# Supplementary material for: Land Use Influences the Composition and Antimicrobial Effects of Propolis
Source: MDPI journal article supplement (doi:10.3390/insects13030239), 2022-02-28
Supplement: s1 [file s1]

**Table S1.** Results of pairwise comparisons between apiaries with respect to propolis composition. Analyses were performed subsequent to a significant permutational ANOVA in 'RRPP' using the 'pairwise' function.

| Comparison | Distance between Means | Z-Score     | Pr > d       |
|------------|------------------------|-------------|--------------|
| A:B        | 12.00                  | -0.03       | 0.502        |
| <b>A:C</b> | <b>25.74</b>           | <b>1.71</b> | <b>0.044</b> |
| <b>AD</b>  | <b>26.43</b>           | <b>1.86</b> | <b>0.031</b> |
| A:E        | 22.09                  | 1.27        | 0.107        |
| <b>B:C</b> | <b>27.91</b>           | <b>2.10</b> | <b>0.016</b> |
| B:D        | 18.14                  | 1.12        | 0.146        |
| B:E        | 11.29                  | -0.18       | 0.557        |
| <b>C:D</b> | <b>40.75</b>           | <b>3.16</b> | <b>0.001</b> |
| <b>C:E</b> | <b>32.98</b>           | <b>2.34</b> | <b>0.006</b> |
| D:E        | 14.70                  | 0.54        | 0.301        |

The bolded text represents only those that were statistically significant.

### Script S1

#### Supplementary R script of analyses from this study

```
library(RRPP)
```

```
library(ape)
```

```
library(vegan)
```

```
##Sum abundance vs cropland
```

```
PropSum<-read.csv('PropSumAbundance.csv')
```

```
summary(lm(PropSum$Mean_peak_sum_abundance~PropSum$Cropland_coverage))
```

```
##GCMS comparisons among apiaries
```

```
PropGCMS<-read.csv('PropGCMS.csv')
```

```
apiary<-PropGCMS[,2]
```

```
compounds<-PropGCMS[,-(1:2)]
```

```
####Euclidean
```

```
pca.Euc<-prcomp(compounds)$x
```

```
summary(prcomp(compounds))
```

```
summary(lm.rrpp(pca.Euc~ apiary))
```

```
pair<-pairwise(lm.rrpp(pca.Euc~ apiary),groups=apiary)
```

```
summary(pair,test.type='dist')
```

```

####Jaccard

distJac<-vegdist(compounds,method='jaccard')

pcoa.Jac<-pcoa(distJac)$vectors

summary(lm.rrpp(pcoa.Jac~ apiary))


##MIC50

PropMIC50_bigmodel<-read.csv('PropMIC50_bigmodel.csv')

summary(aov(PropMIC50_bigmodel$MIC50~PropMIC50_bigmodel$pathoge
n*PropMIC50_bigmodel $apiary))

PropMIC50_bigmodel$pathogen<-
factor(PropMIC50_bigmodel$pathogen,levels=c('Serratia_marcescens','Klebsi
ella_pneumoniae','Lysinibacillus_sphaericus','Paenibacillus_larvae'))

TukeyHSD(aov(PropMIC50_bigmodel$MIC50~
PropMIC50_bigmodel$pathogen))


PropMIC50<-read.csv('PropMIC50.csv')cfa

PropMIC50_noF<-subset(PropMIC50, PropMIC50$apiary!='F')


summary(lm(PropMIC50_noF$Klebsiella_pneumoniae~ PropMIC50_noF
$apiary))

TukeyHSD(aov(PropMIC50_noF$Klebsiella_pneumoniae~ PropMIC50_noF
$apiary))

summary(lm(PropMIC50_noF$Serratia_marcescens~ PropMIC50_noF
$apiary))

TukeyHSD(aov(PropMIC50_noF$Serratia_marcescens~ PropMIC50_noF
$apiary))

```
