# Supplementary material for: Land Use Influences the Composition and Antimicrobial Effects of Propolis
Source: MDPI journal article supplement (doi:10.3390/insects13030239), 2022-02-28
Supplement: s1 [file s1]

Acq On : 7 Mar 2019 00:57  
Operator :  
Sample : Apiary B 25 :  
Misc  
ALS Vial : 6 Sample Multiplier: 1

Integration Parameters: autoint1.e  
Integrator: ChemStation

| peak<br># | R.T.<br>min | first<br>scan | max<br>scan | last<br>scan | PK<br>TY | peak<br>height | corr.<br>area | corr.<br>% max. | % of<br>total |
|-----------|-------------|---------------|-------------|--------------|----------|----------------|---------------|-----------------|---------------|
| ---       | ----        | -----         | -----       | -----        | ---      | -----          | -----         | -----           | -----         |
| 1         | 4.479       | 208           | 243         | 273          | BB 4     | 25407          | 1151311       | 0.33%           | 0.197%        |
| 2         | 6.099       | 466           | 527         | 537          | BV 2     | 19354          | 136098        | 0.04%           | 0.023%        |
| 3         | 6.869       | 597           | 661         | 697          | PB 3     | 12985          | 2606699       | 0.75%           | 0.445%        |
| 4         | 8.295       | 891           | 910         | 1040         | PB 2     | 302619         | 25250128      | 7.22%           | 4.310%        |
| 5         | 9.449       | 1083          | 1112        | 1151         | BB 3     | 42391          | 2569839       | 0.73%           | 0.439%        |
| 6         | 11.183      | 1385          | 1415        | 1458         | BB 2     | 24539          | 1770732       | 0.51%           | 0.302%        |
| 7         | 14.525      | 1739          | 1999        | 2149         | BV 2     | 825650         | 349872270     | 100.00%         | 59.720%       |
| 8         | 15.522      | 2149          | 2173        | 2373         | VB 3     | 781947         | 79704452      | 22.78%          | 13.605%       |
| 9         | 19.464      | 2776          | 2862        | 2922         | BV       | 388966         | 36997953      | 10.57%          | 6.315%        |
| 10        | 19.831      | 2922          | 2926        | 2935         | VV       | 24902          | 1067588       | 0.31%           | 0.182%        |
| 11        | 19.906      | 2935          | 2940        | 2981         | VB       | 24148          | 1879256       | 0.54%           | 0.321%        |
| 12        | 23.802      | 3447          | 3620        | 3696         | PB 9     | 29107          | 8926748       | 2.55%           | 1.524%        |
| 13        | 25.228      | 3783          | 3869        | 3941         | BB 9     | 31369          | 4697798       | 1.34%           | 0.802%        |
| 14        | 26.318      | 3945          | 4060        | 4070         | BV 9     | 8708           | -1693442      | -0.48%          | -0.289%       |
| 15        | 26.445      | 4070          | 4082        | 4095         | VB 9     | 13020          | 624715        | 0.18%           | 0.107%        |
| 16        | 27.115      | 4113          | 4199        | 4255         | BV 9     | 17369          | 4728674       | 1.35%           | 0.807%        |
| 17        | 27.513      | 4255          | 4269        | 4284         | VV 9     | 10665          | 630726        | 0.18%           | 0.108%        |
| 18        | 33.704      | 5263          | 5351        | 5476         | BV 9     | 39540          | 10735875      | 3.07%           | 1.833%        |
| 19        | 35.047      | 5516          | 5586        | 5754         | BV 9     | 56650          | 14538052      | 4.16%           | 2.482%        |
| 20        | 38.554      | 6064          | 6198        | 6433         | BV 4     | 97034          | 34030920      | 9.73%           | 5.809%        |
| 21        | 43.132      | 6856          | 6999        | 7091         | PB 4     | 14910          | 5628959       | 1.61%           | 0.961%        |

Sum of corrected areas: 585855350

Acq On : 7 Mar 2019 2:27  
 Operator :  
 Sample : Apiary B 32 :  
 Misc  
 ALS Vial : 7 Sample Multiplier: 1

Integration Parameters: autoint1.e  
 Integrator: ChemStation

| peak<br># | R.T.<br>min | first<br>scan | max<br>scan | last<br>scan | PK<br>TY | peak<br>height | corr.<br>area | corr.<br>% max. | % of<br>total |
|-----------|-------------|---------------|-------------|--------------|----------|----------------|---------------|-----------------|---------------|
| ---       | ----        | -----         | -----       | -----        | ---      | -----          | -----         | -----           | -----         |
| 1         | 4.476       | 208           | 243         | 275          | BB 4     | 18943          | 857757        | 0.45%           | 0.202%        |
| 2         | 6.101       | 498           | 527         | 535          | BV 2     | 16625          | 240022        | 0.13%           | 0.057%        |
| 3         | 7.026       | 598           | 688         | 714          | PV       | 15897          | 4225991       | 2.22%           | 0.995%        |
| 4         | 7.247       | 714           | 727         | 737          | VV 5     | 11642          | 517715        | 0.27%           | 0.122%        |
| 5         | 8.297       | 890           | 911         | 961          | PV 2     | 224343         | 14524101      | 7.65%           | 3.421%        |
| 6         | 9.452       | 1084          | 1112        | 1185         | BV 2     | 50797          | 4181618       | 2.20%           | 0.985%        |
| 7         | 11.183      | 1386          | 1415        | 1473         | BB 3     | 25889          | 2031990       | 1.07%           | 0.479%        |
| 8         | 14.239      | 1741          | 1949        | 2053         | BV 3     | 538204         | 189970011     | 100.00%         | 44.746%       |
| 9         | 14.886      | 2053          | 2062        | 2099         | VB 9     | 22485          | 1673653       | 0.88%           | 0.394%        |
| 10        | 15.519      | 2134          | 2173        | 2327         | BB 3     | 443630         | 43005587      | 22.64%          | 10.130%       |
| 11        | 19.468      | 2748          | 2863        | 2981         | BV 2     | 301504         | 35895026      | 18.90%          | 8.455%        |
| 12        | 20.209      | 2981          | 2992        | 3032         | VB 6     | 12015          | 1238921       | 0.65%           | 0.292%        |
| 13        | 23.807      | 3540          | 3621        | 3728         | BV 6     | 27994          | 10119746      | 5.33%           | 2.384%        |
| 14        | 25.251      | 3837          | 3873        | 3950         | BV 8     | 24428          | 3772744       | 1.99%           | 0.889%        |
| 15        | 26.310      | 3950          | 4059        | 4069         | PV 8     | 30643          | 2838453       | 1.49%           | 0.669%        |
| 16        | 26.456      | 4069          | 4084        | 4100         | VV 8     | 38467          | 3026341       | 1.59%           | 0.713%        |
| 17        | 27.159      | 4100          | 4207        | 4232         | VV 8     | 44909          | 16140824      | 8.50%           | 3.802%        |
| 18        | 27.527      | 4232          | 4271        | 4278         | VV 8     | 50626          | 7231413       | 3.81%           | 1.703%        |
| 19        | 27.640      | 4278          | 4291        | 4352         | VV 8     | 56159          | 11149293      | 5.87%           | 2.626%        |
| 20        | 28.074      | 4352          | 4367        | 4495         | VB 8     | 39224          | 8446450       | 4.45%           | 1.990%        |
| 21        | 33.764      | 5268          | 5361        | 5461         | BV 8     | 34842          | 8264945       | 4.35%           | 1.947%        |
| 22        | 35.138      | 5503          | 5601        | 5861         | BV 8     | 133991         | 37784165      | 19.89%          | 8.900%        |
| 23        | 38.686      | 6086          | 6222        | 6383         | BV 6     | 45058          | 17414022      | 9.17%           | 4.102%        |

Sum of corrected areas: 424550786

File  
Operator :  
Acquired : 7 Mar 2019 2:27 using AcqMethod FOMETHOD.M  
Instrument : 5975 MSD  
Sample Name: Apiary B 32  
Misc Info :  
Vial Number: 7

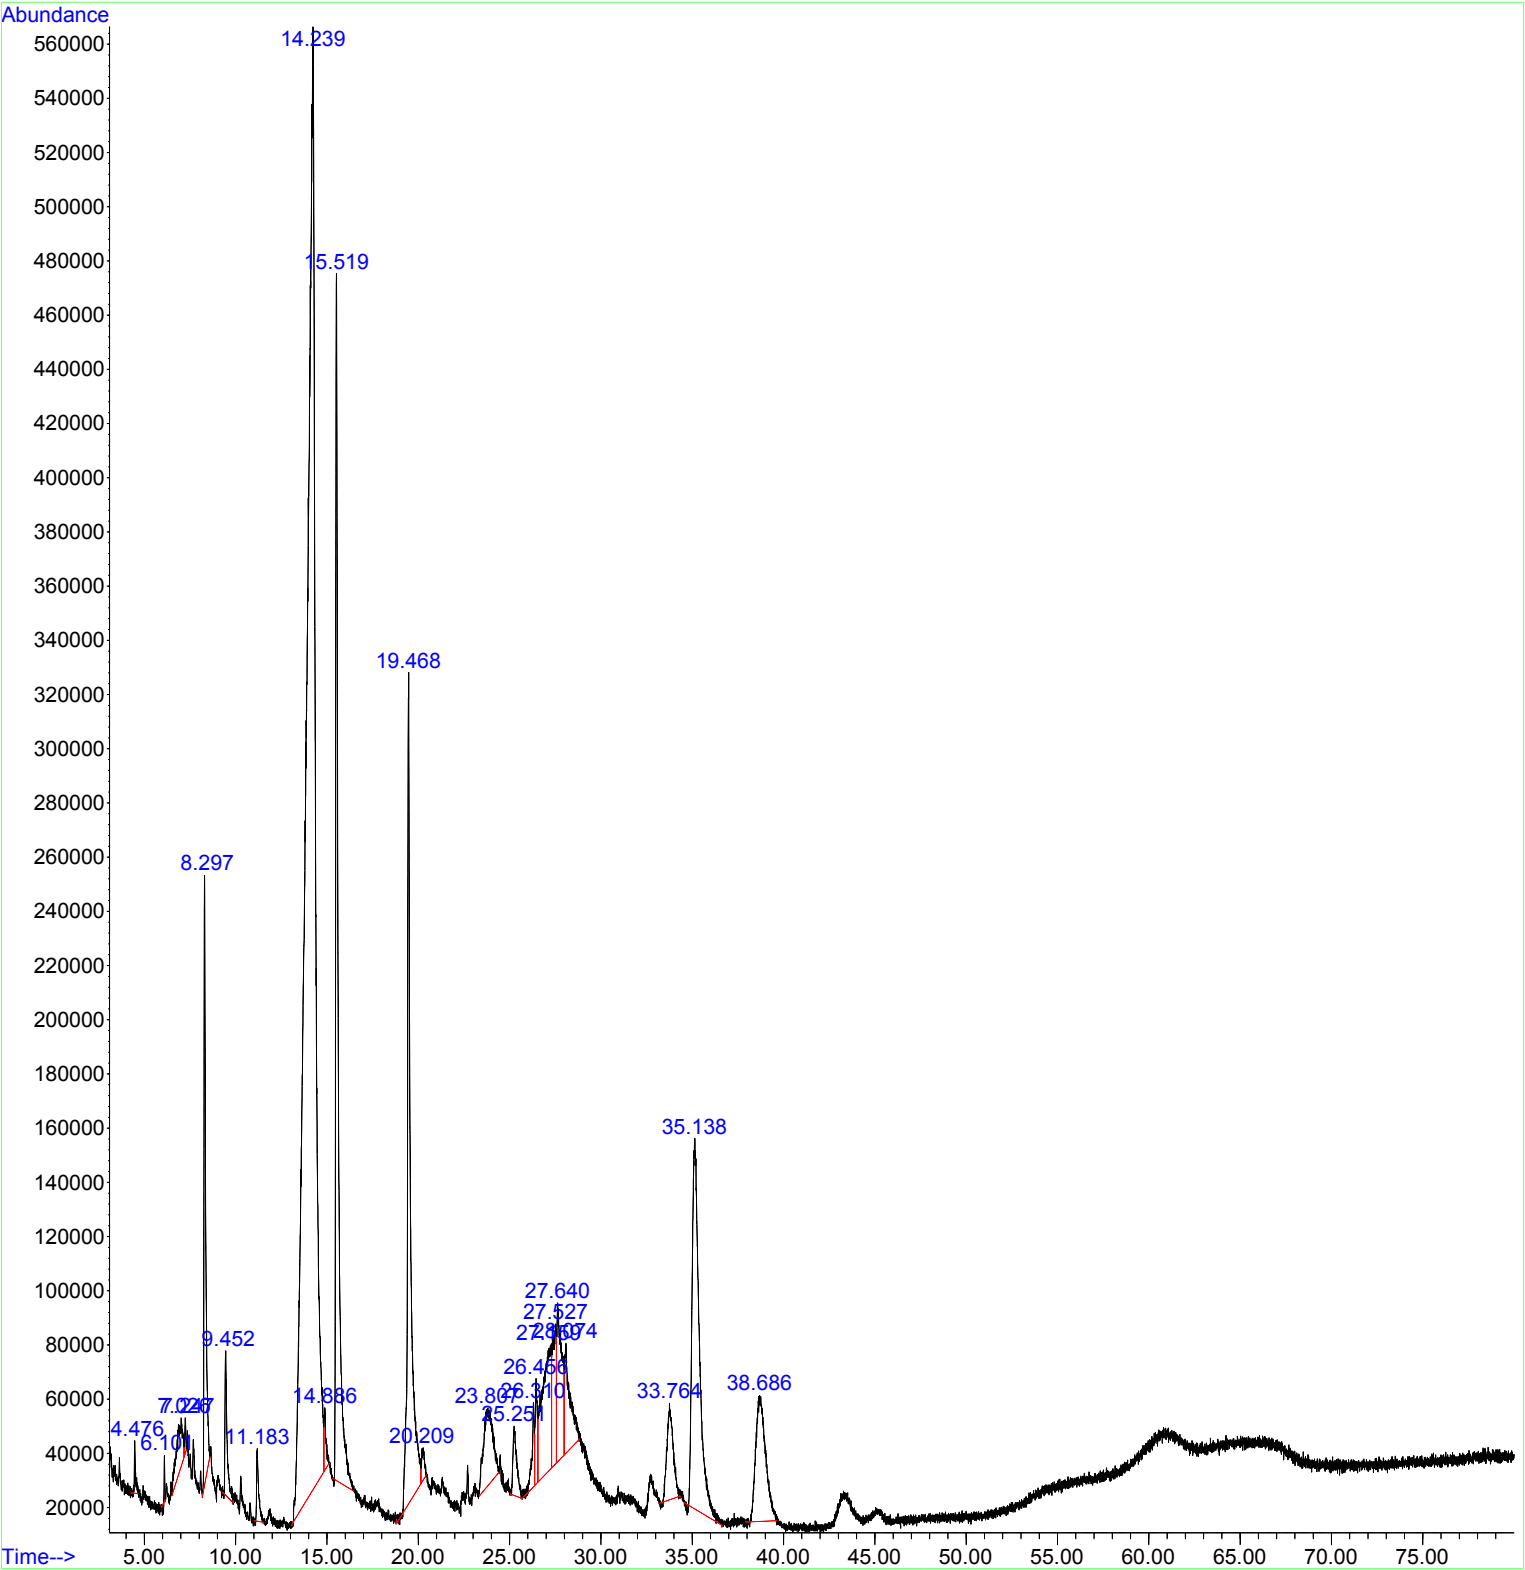

Acq On : 7 Mar 2019 3:56  
 Operator :  
 Sample : Apiary B 33 :  
 Misc :  
 ALS Vial : 8 Sample Multiplier: 1

Integration Parameters: autoint1.e  
 Integrator: ChemStation

| peak<br># | R.T.<br>min | first<br>scan | max<br>scan | last<br>scan | PK<br>TY | peak<br>height | corr.<br>area | corr.<br>% max. | % of<br>total |
|-----------|-------------|---------------|-------------|--------------|----------|----------------|---------------|-----------------|---------------|
| 1         | 3.640       | 71            | 97          | 116          | BB       | 33992          | 807262        | 0.09%           | 0.042%        |
| 2         | 4.490       | 215           | 245         | 303          | BB 3     | 34526          | 3000173       | 0.34%           | 0.157%        |
| 3         | 6.101       | 502           | 527         | 537          | BV 2     | 27081          | 563270        | 0.06%           | 0.029%        |
| 4         | 6.611       | 601           | 616         | 638          | VV 2     | 19433          | 1525844       | 0.17%           | 0.080%        |
| 5         | 6.797       | 638           | 648         | 670          | VV 9     | 22713          | 1318552       | 0.15%           | 0.069%        |
| 6         | 7.258       | 670           | 729         | 740          | VV 4     | 23611          | 2784848       | 0.31%           | 0.145%        |
| 7         | 7.360       | 740           | 747         | 779          | VB 5     | 16393          | 1079382       | 0.12%           | 0.056%        |
| 8         | 8.299       | 887           | 911         | 1018         | PV 2     | 535163         | 45624999      | 5.14%           | 2.381%        |
| 9         | 9.456       | 1082          | 1113        | 1165         | BV 3     | 102757         | 7082054       | 0.80%           | 0.370%        |
| 10        | 10.296      | 1197          | 1260        | 1284         | PV 3     | 32500          | 2675055       | 0.30%           | 0.140%        |
| 11        | 10.464      | 1284          | 1289        | 1306         | VV 10    | 14195          | 645379        | 0.07%           | 0.034%        |
| 12        | 11.187      | 1386          | 1416        | 1468         | BB 3     | 19315          | 1562510       | 0.18%           | 0.082%        |
| 13        | 13.201      | 1739          | 1768        | 1781         | BV 3     | 37702          | 1689385       | 0.19%           | 0.088%        |
| 14        | 15.363      | 1781          | 2145        | 2164         | VV 3     | 1658331        | 888370074     | 100.00%         | 46.368%       |
| 15        | 15.545      | 2164          | 2177        | 2429         | VV 2     | 1783827        | 240867170     | 27.11%          | 12.572%       |
| 16        | 19.490      | 2800          | 2867        | 2985         | BV 2     | 834637         | 99466498      | 11.20%          | 5.192%        |
| 17        | 20.280      | 2985          | 3005        | 3082         | VB 5     | 50630          | 9024202       | 1.02%           | 0.471%        |
| 18        | 23.911      | 3449          | 3639        | 3644         | BV 8     | 61829          | 11953588      | 1.35%           | 0.624%        |
| 19        | 23.984      | 3644          | 3652        | 3727         | VV 8     | 60007          | 11907105      | 1.34%           | 0.621%        |
| 20        | 24.494      | 3727          | 3741        | 3796         | VB 6     | 74274          | 4766078       | 0.54%           | 0.249%        |
| 21        | 25.278      | 3842          | 3878        | 3892         | BV 7     | 61652          | 5546158       | 0.62%           | 0.289%        |
| 22        | 25.417      | 3892          | 3902        | 3950         | VV 8     | 63941          | 5069671       | 0.57%           | 0.265%        |
| 23        | 26.315      | 3982          | 4059        | 4072         | PV 8     | 142134         | 9048311       | 1.02%           | 0.472%        |
| 24        | 26.462      | 4072          | 4085        | 4112         | VV 4     | 188726         | 14498063      | 1.63%           | 0.757%        |
| 25        | 26.931      | 4112          | 4167        | 4189         | VV 4     | 86055          | 19598343      | 2.21%           | 1.023%        |
| 26        | 27.168      | 4189          | 4208        | 4217         | VV 4     | 91476          | 8250790       | 0.93%           | 0.431%        |
| 27        | 27.541      | 4217          | 4274        | 4285         | VV 6     | 204421         | 30628280      | 3.45%           | 1.599%        |
| 28        | 27.660      | 4285          | 4295        | 4307         | VV 9     | 223804         | 15538377      | 1.75%           | 0.811%        |
| 29        | 27.803      | 4307          | 4320        | 4325         | VV 9     | 201828         | 12229206      | 1.38%           | 0.638%        |
| 30        | 28.096      | 4325          | 4371        | 4387         | VV 9     | 282885         | 48671772      | 5.48%           | 2.540%        |
| 31        | 28.449      | 4387          | 4432        | 4450         | VV 10    | 290388         | 59677503      | 6.72%           | 3.115%        |
| 32        | 28.623      | 4450          | 4463        | 4496         | VV 10    | 315665         | 47857581      | 5.39%           | 2.498%        |
| 33        | 28.891      | 4496          | 4510        | 4538         | VV 10    | 306267         | 41880126      | 4.71%           | 2.186%        |
| 34        | 29.086      | 4538          | 4544        | 4553         | VV 8     | 291812         | 14344862      | 1.61%           | 0.749%        |
| 35        | 29.164      | 4553          | 4557        | 4853         | VV 3     | 293549         | 107046513     | 12.05%          | 5.587%        |
| 36        | 33.823      | 5294          | 5372        | 5467         | BV 3     | 39500          | 9436066       | 1.06%           | 0.493%        |
| 37        | 35.222      | 5530          | 5616        | 5868         | BB 3     | 234885         | 72350527      | 8.14%           | 3.776%        |
| 38        | 38.834      | 6101          | 6247        | 6491         | BB 4     | 118828         | 53563270      | 6.03%           | 2.796%        |
| 39        | 43.463      | 6915          | 7056        | 7132         | BB 6     | 14421          | 4505744       | 0.51%           | 0.235%        |
| 40        | 64.531      | 10489         | 10738       | 10743        | BV 6     | 8076           | -2284656      | -0.26%          | -0.119%       |
| 41        | 64.917      | 10743         | 10806       | 10837        | VB 6     | 9034           | 1747049       | 0.20%           | 0.091%        |

Sum of corrected areas: 1915916985

Acq On : 7 Mar 2019 5:26  
 Operator :  
 Sample : Apiary B 39 :  
 Misc  
 ALS Vial : 9 Sample Multiplier: 1

Integration Parameters: autoint1.e  
 Integrator: ChemStation

| peak<br># | R.T.<br>min | first<br>scan | max<br>scan | last<br>scan | PK<br>TY | peak<br>height | corr.<br>area | corr.<br>% max. | % of<br>total |
|-----------|-------------|---------------|-------------|--------------|----------|----------------|---------------|-----------------|---------------|
| ---       | ----        | -----         | -----       | -----        | ---      | -----          | -----         | -----           | -----         |
| 1         | 3.640       | 42            | 97          | 115          | BB       | 36238          | 1142367       | 0.07%           | 0.036%        |
| 2         | 4.482       | 215           | 244         | 268          | BV 3     | 18656          | 838685        | 0.05%           | 0.026%        |
| 3         | 6.101       | 501           | 527         | 539          | BV 3     | 31712          | 752871        | 0.04%           | 0.024%        |
| 4         | 6.492       | 572           | 595         | 603          | BV       | 19034          | 591155        | 0.03%           | 0.019%        |
| 5         | 6.606       | 603           | 615         | 639          | VV 9     | 26257          | 1929388       | 0.11%           | 0.060%        |
| 6         | 6.796       | 639           | 648         | 671          | VB 4     | 51541          | 1640896       | 0.10%           | 0.051%        |
| 7         | 8.303       | 890           | 912         | 1094         | PB       | 647610         | 55798869      | 3.29%           | 1.747%        |
| 8         | 9.451       | 1095          | 1112        | 1162         | BV       | 147297         | 8394520       | 0.50%           | 0.263%        |
| 9         | 10.305      | 1224          | 1262        | 1308         | BV 3     | 43373          | 4106255       | 0.24%           | 0.129%        |
| 10        | 11.187      | 1386          | 1416        | 1480         | BB 3     | 57033          | 4154003       | 0.25%           | 0.130%        |
| 11        | 13.205      | 1742          | 1768        | 1781         | BV 7     | 20820          | 883065        | 0.05%           | 0.028%        |
| 12        | 15.579      | 1781          | 2183        | 2216         | VV 3     | 4095955        | 1694492313    | 100.00%         | 53.057%       |
| 13        | 15.876      | 2216          | 2235        | 2544         | VV       | 3397204        | 708238077     | 41.80%          | 22.176%       |
| 14        | 19.515      | 2781          | 2871        | 2985         | BV 2     | 1672405        | 203025167     | 11.98%          | 6.357%        |
| 15        | 20.319      | 2985          | 3012        | 3083         | VV 5     | 121139         | 27367802      | 1.62%           | 0.857%        |
| 16        | 20.877      | 3083          | 3109        | 3166         | VV 5     | 38826          | 8013581       | 0.47%           | 0.251%        |
| 17        | 21.338      | 3166          | 3190        | 3257         | VV 5     | 49096          | 6364121       | 0.38%           | 0.199%        |
| 18        | 23.660      | 3529          | 3595        | 3605         | BV 5     | 38590          | 3359179       | 0.20%           | 0.105%        |
| 19        | 24.093      | 3605          | 3671        | 3727         | VV 5     | 66841          | 22835543      | 1.35%           | 0.715%        |
| 20        | 24.499      | 3727          | 3742        | 3802         | VV 8     | 128204         | 11202066      | 0.66%           | 0.351%        |
| 21        | 25.308      | 3842          | 3883        | 3895         | VV 5     | 160100         | 14575342      | 0.86%           | 0.456%        |
| 22        | 25.412      | 3895          | 3902        | 3953         | VV 8     | 146309         | 14151277      | 0.84%           | 0.443%        |
| 23        | 25.788      | 3953          | 3967        | 4000         | VV 8     | 39165          | 2328135       | 0.14%           | 0.073%        |
| 24        | 26.321      | 4043          | 4061        | 4073         | VV 3     | 214117         | 9451325       | 0.56%           | 0.296%        |
| 25        | 26.468      | 4073          | 4086        | 4117         | VV 5     | 227667         | 13552229      | 0.80%           | 0.424%        |
| 26        | 26.913      | 4117          | 4164        | 4182         | VV 5     | 47253          | 6913799       | 0.41%           | 0.216%        |
| 27        | 27.154      | 4182          | 4206        | 4225         | VV 5     | 48000          | 5150925       | 0.30%           | 0.161%        |
| 28        | 27.551      | 4248          | 4276        | 4287         | VV 5     | 261816         | 14778215      | 0.87%           | 0.463%        |
| 29        | 27.672      | 4287          | 4297        | 4337         | VV 5     | 147477         | 14523101      | 0.86%           | 0.455%        |
| 30        | 28.093      | 4337          | 4370        | 4394         | VV 9     | 192657         | 20294547      | 1.20%           | 0.635%        |
| 31        | 28.646      | 4394          | 4467        | 4493         | VV 9     | 125047         | 36201272      | 2.14%           | 1.134%        |
| 32        | 28.920      | 4493          | 4515        | 4526         | VV 9     | 124874         | 13676097      | 0.81%           | 0.428%        |
| 33        | 29.275      | 4526          | 4577        | 4582         | VV 9     | 174362         | 27325026      | 1.61%           | 0.856%        |
| 34        | 29.335      | 4582          | 4587        | 4610         | VV 9     | 181845         | 16069867      | 0.95%           | 0.503%        |
| 35        | 29.504      | 4610          | 4617        | 4791         | VV 6     | 161077         | 47081552      | 2.78%           | 1.474%        |
| 36        | 33.883      | 5301          | 5382        | 5556         | BV 6     | 44261          | 15878256      | 0.94%           | 0.497%        |
| 37        | 35.299      | 5556          | 5630        | 5868         | PV 6     | 101882         | 33858838      | 2.00%           | 1.060%        |
| 38        | 39.006      | 6139          | 6277        | 6567         | BV 4     | 222216         | 116887029     | 6.90%           | 3.660%        |
| 39        | 43.839      | 6974          | 7122        | 7147         | BV 7     | 13203          | 5881087       | 0.35%           | 0.184%        |

Sum of corrected areas: 3193707839



File  
Operator :  
Acquired : 7 Mar 2019 5:26 using AcqMethod FOMETHOD.M  
Instrument : 5975 MSD  
Sample Name: Apiary B 39  
Misc Info :  
Vial Number: 9

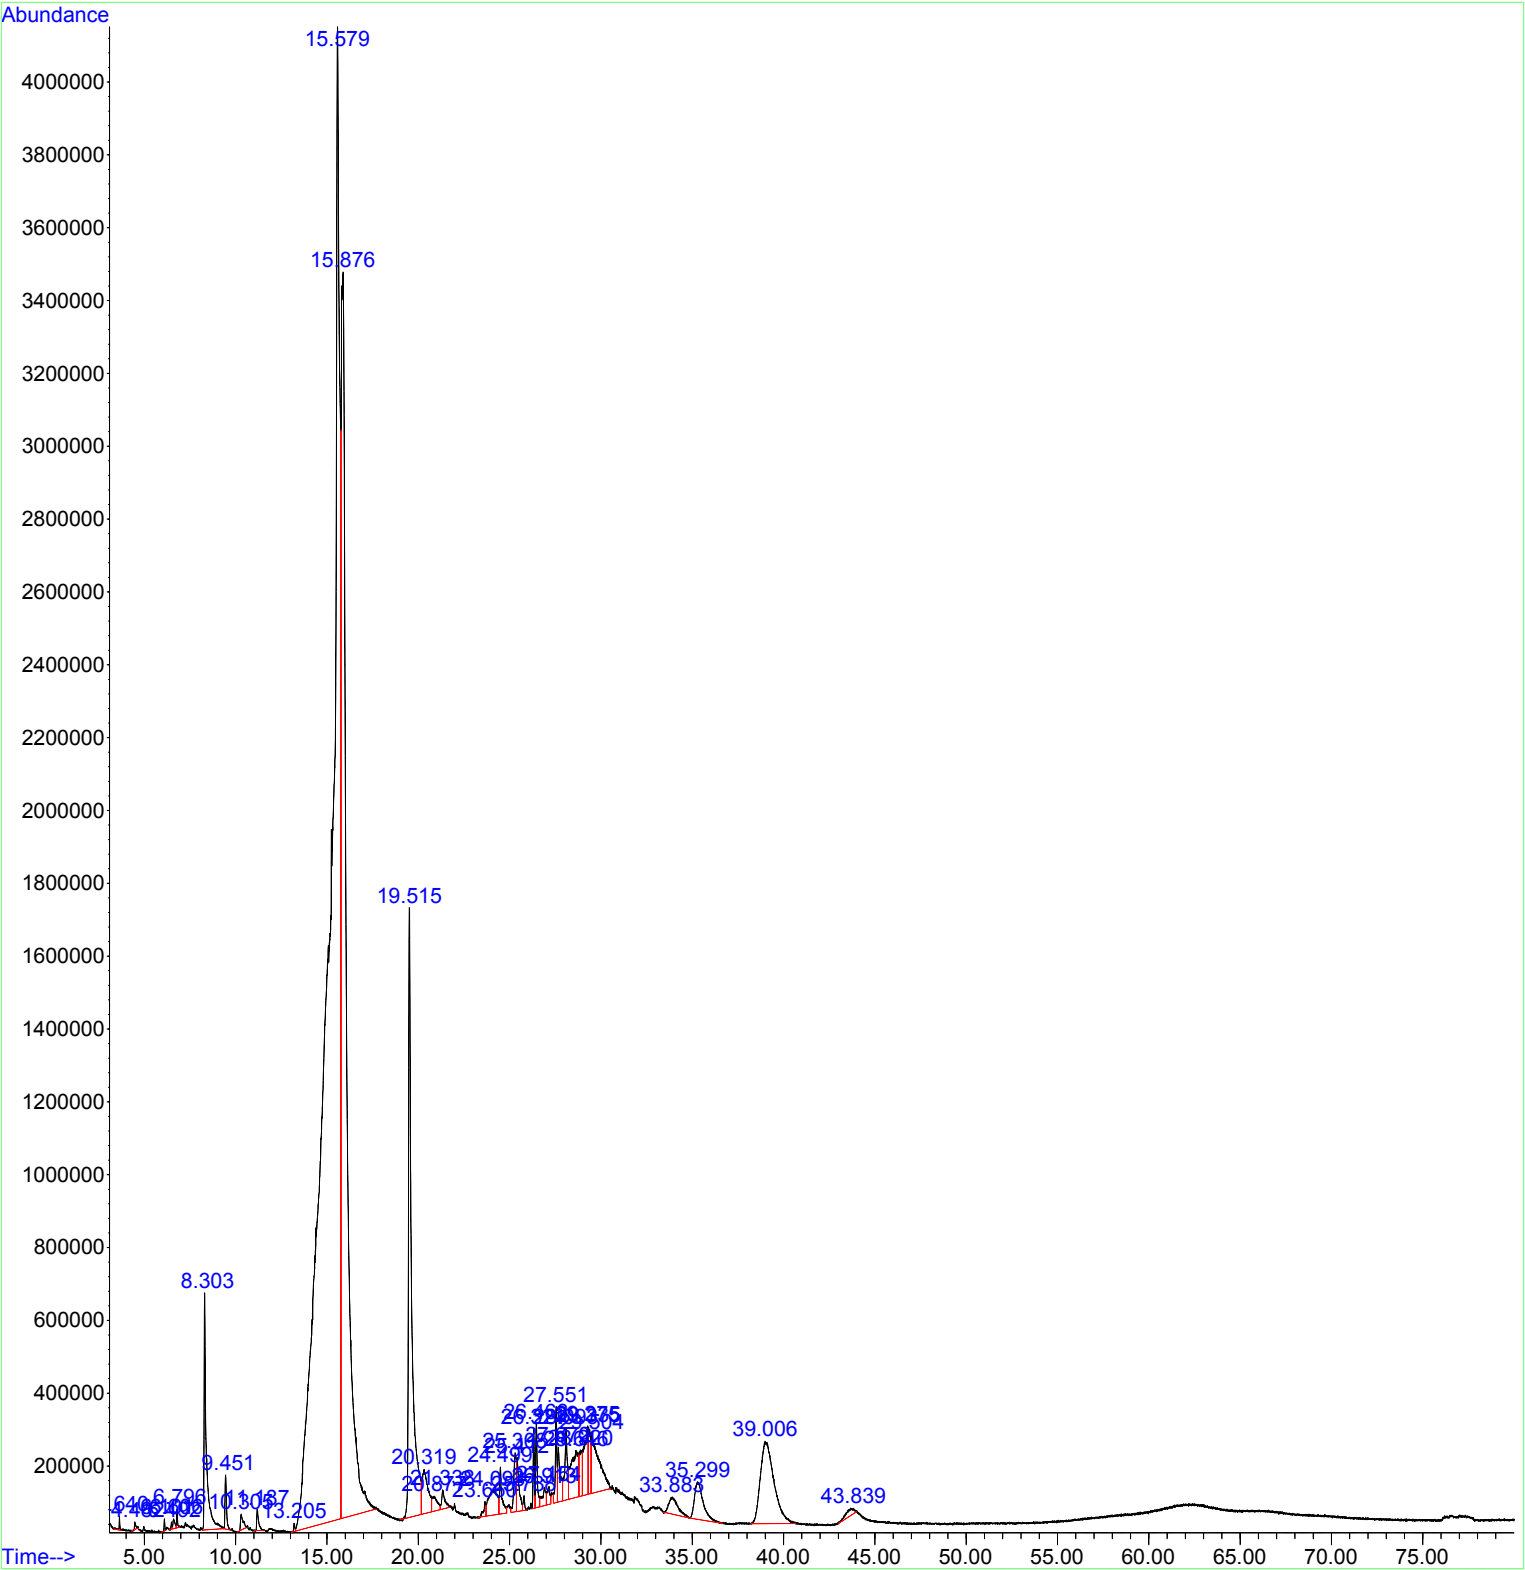



Acq On : 7 Mar 2019 6:55  
 Operator :  
 Sample : Apiary B 41 :  
 Misc  
 ALS Vial : 10 Sample Multiplier: 1

Integration Parameters: autoint1.e  
 Integrator: ChemStation

| peak<br># | R.T.<br>min | first<br>scan | max<br>scan | last<br>scan | PK<br>TY | peak<br>height | corr.<br>area | corr.<br>% max. | % of<br>total |
|-----------|-------------|---------------|-------------|--------------|----------|----------------|---------------|-----------------|---------------|
| ---       | ---         | ---           | ---         | ---          | ---      | ---            | ---           | ---             | ---           |
| 1         | 3.641       | 71            | 97          | 118          | BB       | 35212          | 885365        | 0.13%           | 0.047%        |
| 2         | 4.487       | 185           | 245         | 268          | BV 3     | 32197          | 747910        | 0.11%           | 0.039%        |
| 3         | 6.102       | 500           | 527         | 539          | BV 2     | 29548          | 682286        | 0.10%           | 0.036%        |
| 4         | 6.798       | 640           | 649         | 664          | VV 10    | 18415          | 597277        | 0.09%           | 0.031%        |
| 5         | 8.306       | 889           | 912         | 1072         | PB       | 575835         | 49389075      | 7.21%           | 2.602%        |
| 6         | 9.456       | 1083          | 1113        | 1166         | BV 4     | 102031         | 6815033       | 1.00%           | 0.359%        |
| 7         | 10.307      | 1227          | 1262        | 1285         | BV 4     | 27853          | 2215541       | 0.32%           | 0.117%        |
| 8         | 10.470      | 1285          | 1290        | 1310         | VV 4     | 16243          | 784641        | 0.11%           | 0.041%        |
| 9         | 11.201      | 1386          | 1418        | 1500         | BB 3     | 54928          | 5096882       | 0.74%           | 0.268%        |
| 10        | 13.210      | 1705          | 1769        | 1779         | BV 3     | 27308          | 390523        | 0.06%           | 0.021%        |
| 11        | 14.379      | 1779          | 1973        | 1979         | VV       | 600672         | 176268499     | 25.74%          | 9.285%        |
| 12        | 15.392      | 1979          | 2151        | 2167         | VV 3     | 1608646        | 684824960     | 100.00%         | 36.075%       |
| 13        | 15.569      | 2167          | 2182        | 2423         | VV 2     | 2123413        | 337344779     | 49.26%          | 17.771%       |
| 14        | 19.506      | 2792          | 2870        | 2990         | BV 2     | 811701         | 113660308     | 16.60%          | 5.987%        |
| 15        | 20.328      | 2990          | 3013        | 3079         | VV 6     | 61837          | 13331408      | 1.95%           | 0.702%        |
| 16        | 21.345      | 3175          | 3191        | 3254         | VV 6     | 24444          | 2684358       | 0.39%           | 0.141%        |
| 17        | 23.495      | 3530          | 3567        | 3573         | BV 6     | 27269          | 1632896       | 0.24%           | 0.086%        |
| 18        | 24.185      | 3573          | 3687        | 3728         | VV 7     | 84120          | 31945483      | 4.66%           | 1.683%        |
| 19        | 24.498      | 3728          | 3742        | 3787         | VV 7     | 88092          | 12407277      | 1.81%           | 0.654%        |
| 20        | 24.779      | 3787          | 3791        | 3810         | VV 7     | 51581          | 3998736       | 0.58%           | 0.211%        |
| 21        | 24.925      | 3810          | 3817        | 3854         | VV 7     | 49522          | 6798016       | 0.99%           | 0.358%        |
| 22        | 25.334      | 3854          | 3888        | 3928         | VV 10    | 118328         | 21493471      | 3.14%           | 1.132%        |
| 23        | 25.593      | 3928          | 3933        | 3959         | VV 10    | 56761          | 5004110       | 0.73%           | 0.264%        |
| 24        | 26.322      | 4047          | 4061        | 4072         | VV 5     | 47506          | 2156840       | 0.31%           | 0.114%        |
| 25        | 26.471      | 4072          | 4087        | 4110         | VV 4     | 75313          | 4610119       | 0.67%           | 0.243%        |
| 26        | 26.916      | 4120          | 4164        | 4183         | VV 4     | 31491          | 5042135       | 0.74%           | 0.266%        |
| 27        | 27.153      | 4183          | 4206        | 4223         | VV 4     | 35796          | 4175854       | 0.61%           | 0.220%        |
| 28        | 27.551      | 4258          | 4276        | 4285         | VV 10    | 73290          | 4648062       | 0.68%           | 0.245%        |
| 29        | 27.682      | 4285          | 4298        | 4325         | VV 10    | 80395          | 7559940       | 1.10%           | 0.398%        |
| 30        | 28.094      | 4325          | 4370        | 4390         | VV 10    | 111237         | 14248614      | 2.08%           | 0.751%        |
| 31        | 28.656      | 4390          | 4469        | 4473         | VV 6     | 121652         | 26130930      | 3.82%           | 1.377%        |
| 32        | 29.553      | 4473          | 4625        | 4630         | VV 9     | 189377         | 86170854      | 12.58%          | 4.539%        |
| 33        | 29.607      | 4630          | 4635        | 5165         | VV 8     | 185425         | 152774268     | 22.31%          | 8.048%        |
| 34        | 33.992      | 5305          | 5401        | 5560         | BV 8     | 37259          | 13440044      | 1.96%           | 0.708%        |
| 35        | 35.378      | 5560          | 5643        | 5928         | PB 8     | 77390          | 28474467      | 4.16%           | 1.500%        |
| 36        | 39.138      | 6156          | 6300        | 6661         | BB 4     | 117481         | 69900375      | 10.21%          | 3.682%        |

Sum of corrected areas: 1898331337

File  
Operator :  
Acquired : 7 Mar 2019 6:55 using AcqMethod FOMETHOD.M  
Instrument : 5975 MSD  
Sample Name: Apiary B 41  
Misc Info :  
Vial Number: 10

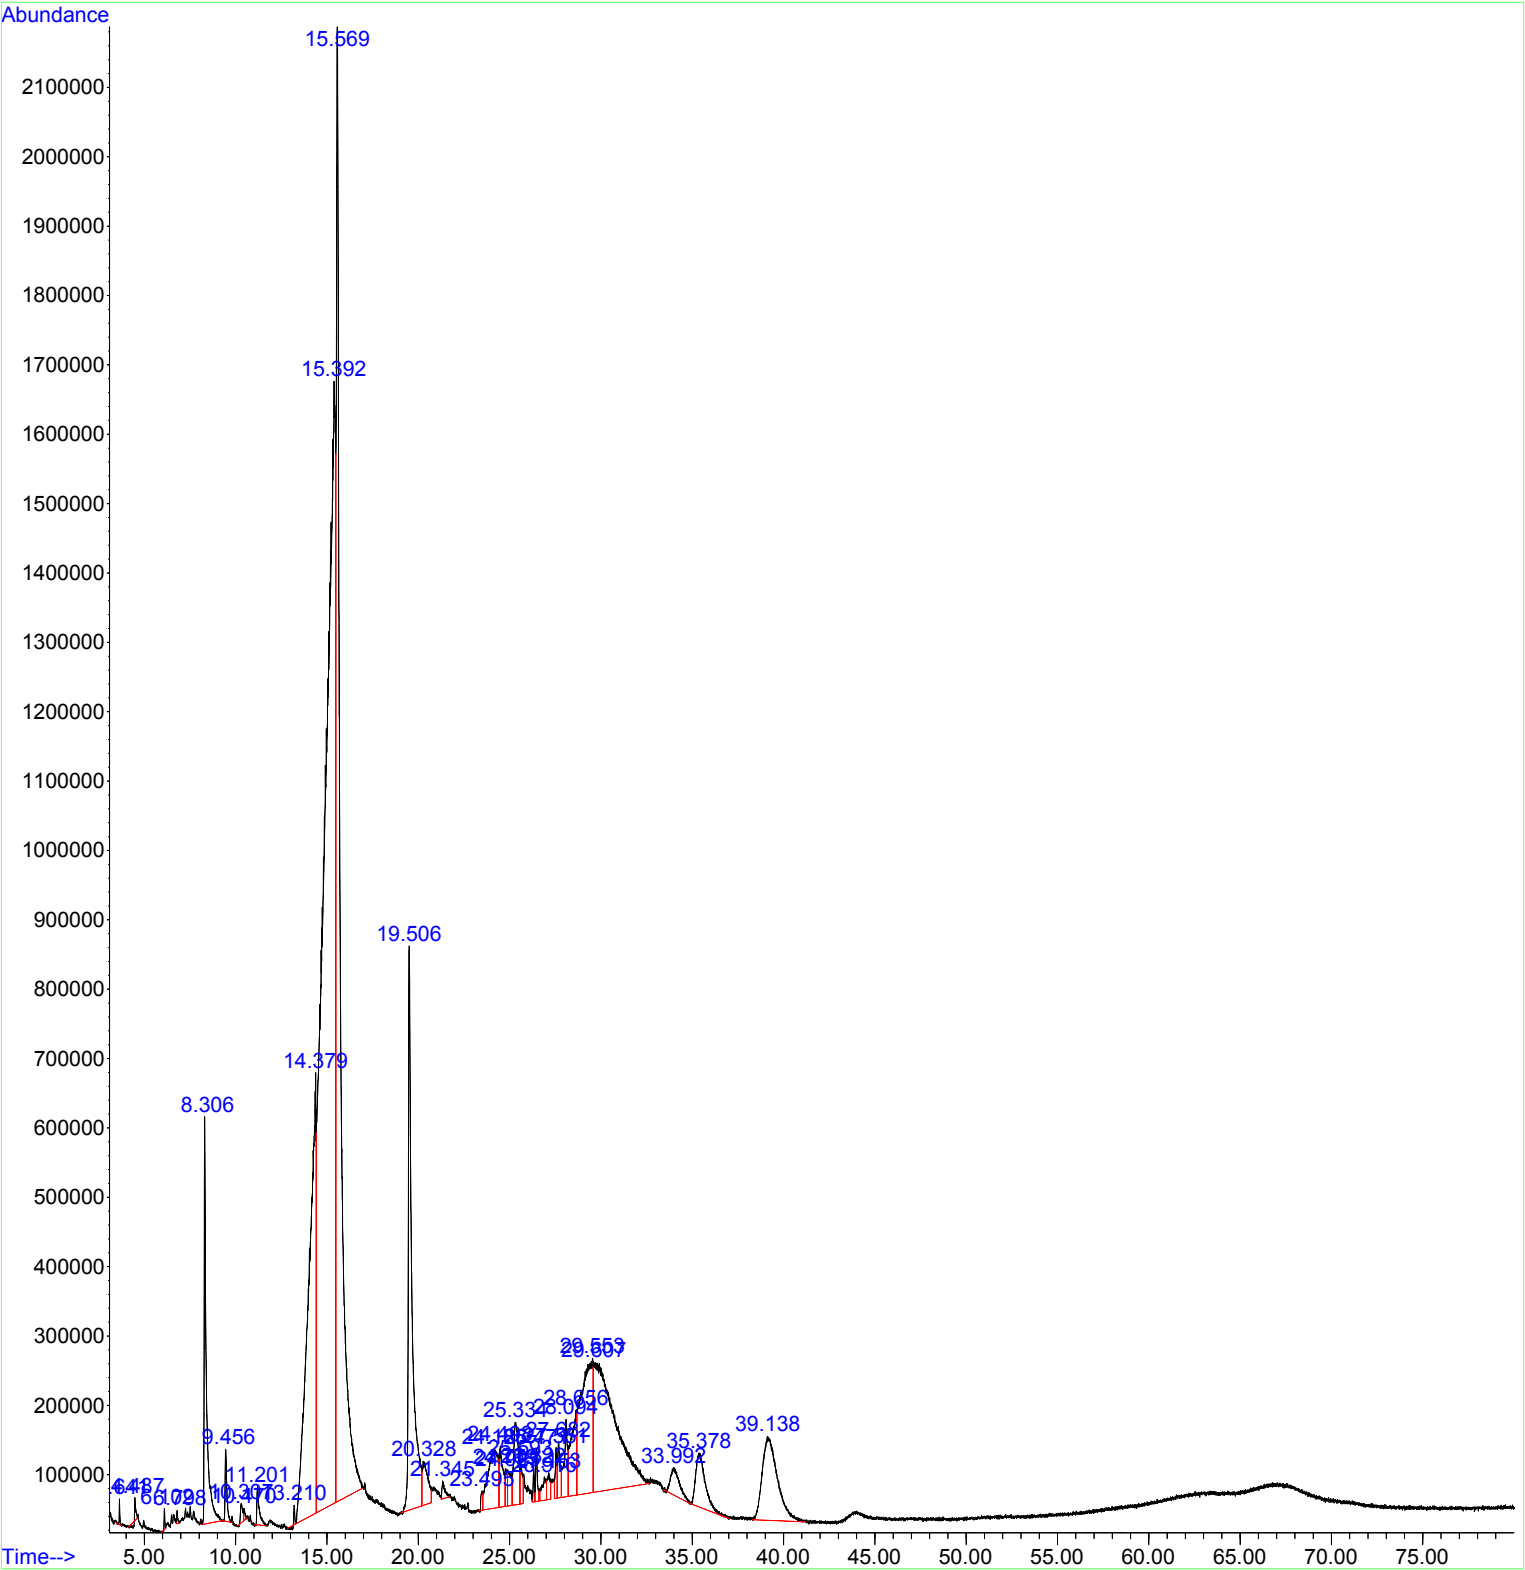

File  
Operator :  
Acquired : 7 Mar 2019 00:57 using AcqMethod FOMETHOD.M  
Instrument : 5975 MSD  
Sample Name: Apiary B 25  
Misc Info :  
Vial Number: 6

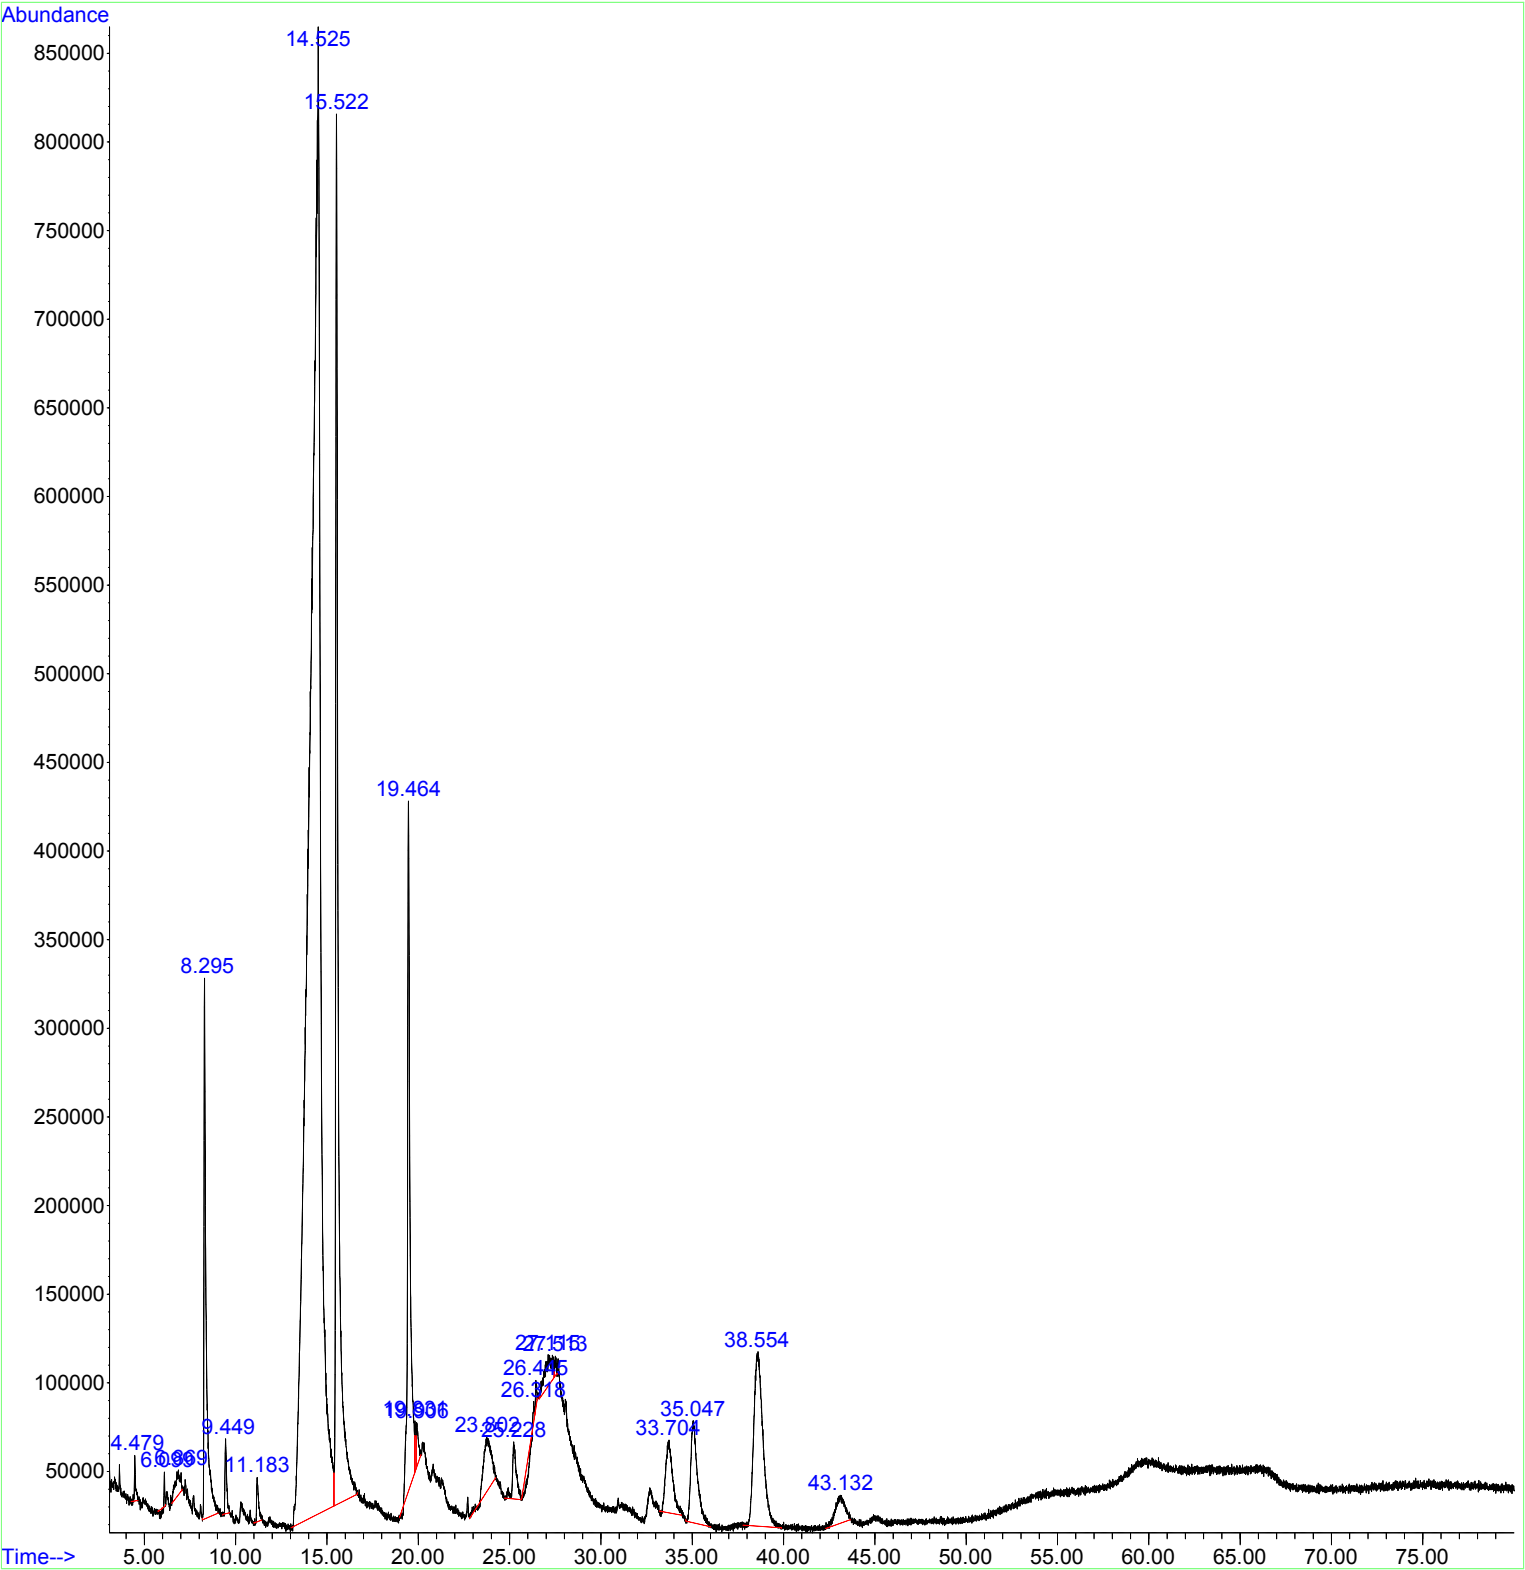

File  
Operator :  
Acquired : 7 Mar 2019 3:56 using AcqMethod FOMETHOD.M  
Instrument : 5975 MSD  
Sample Name: Apiary B 33  
Misc Info :  
Vial Number: 8

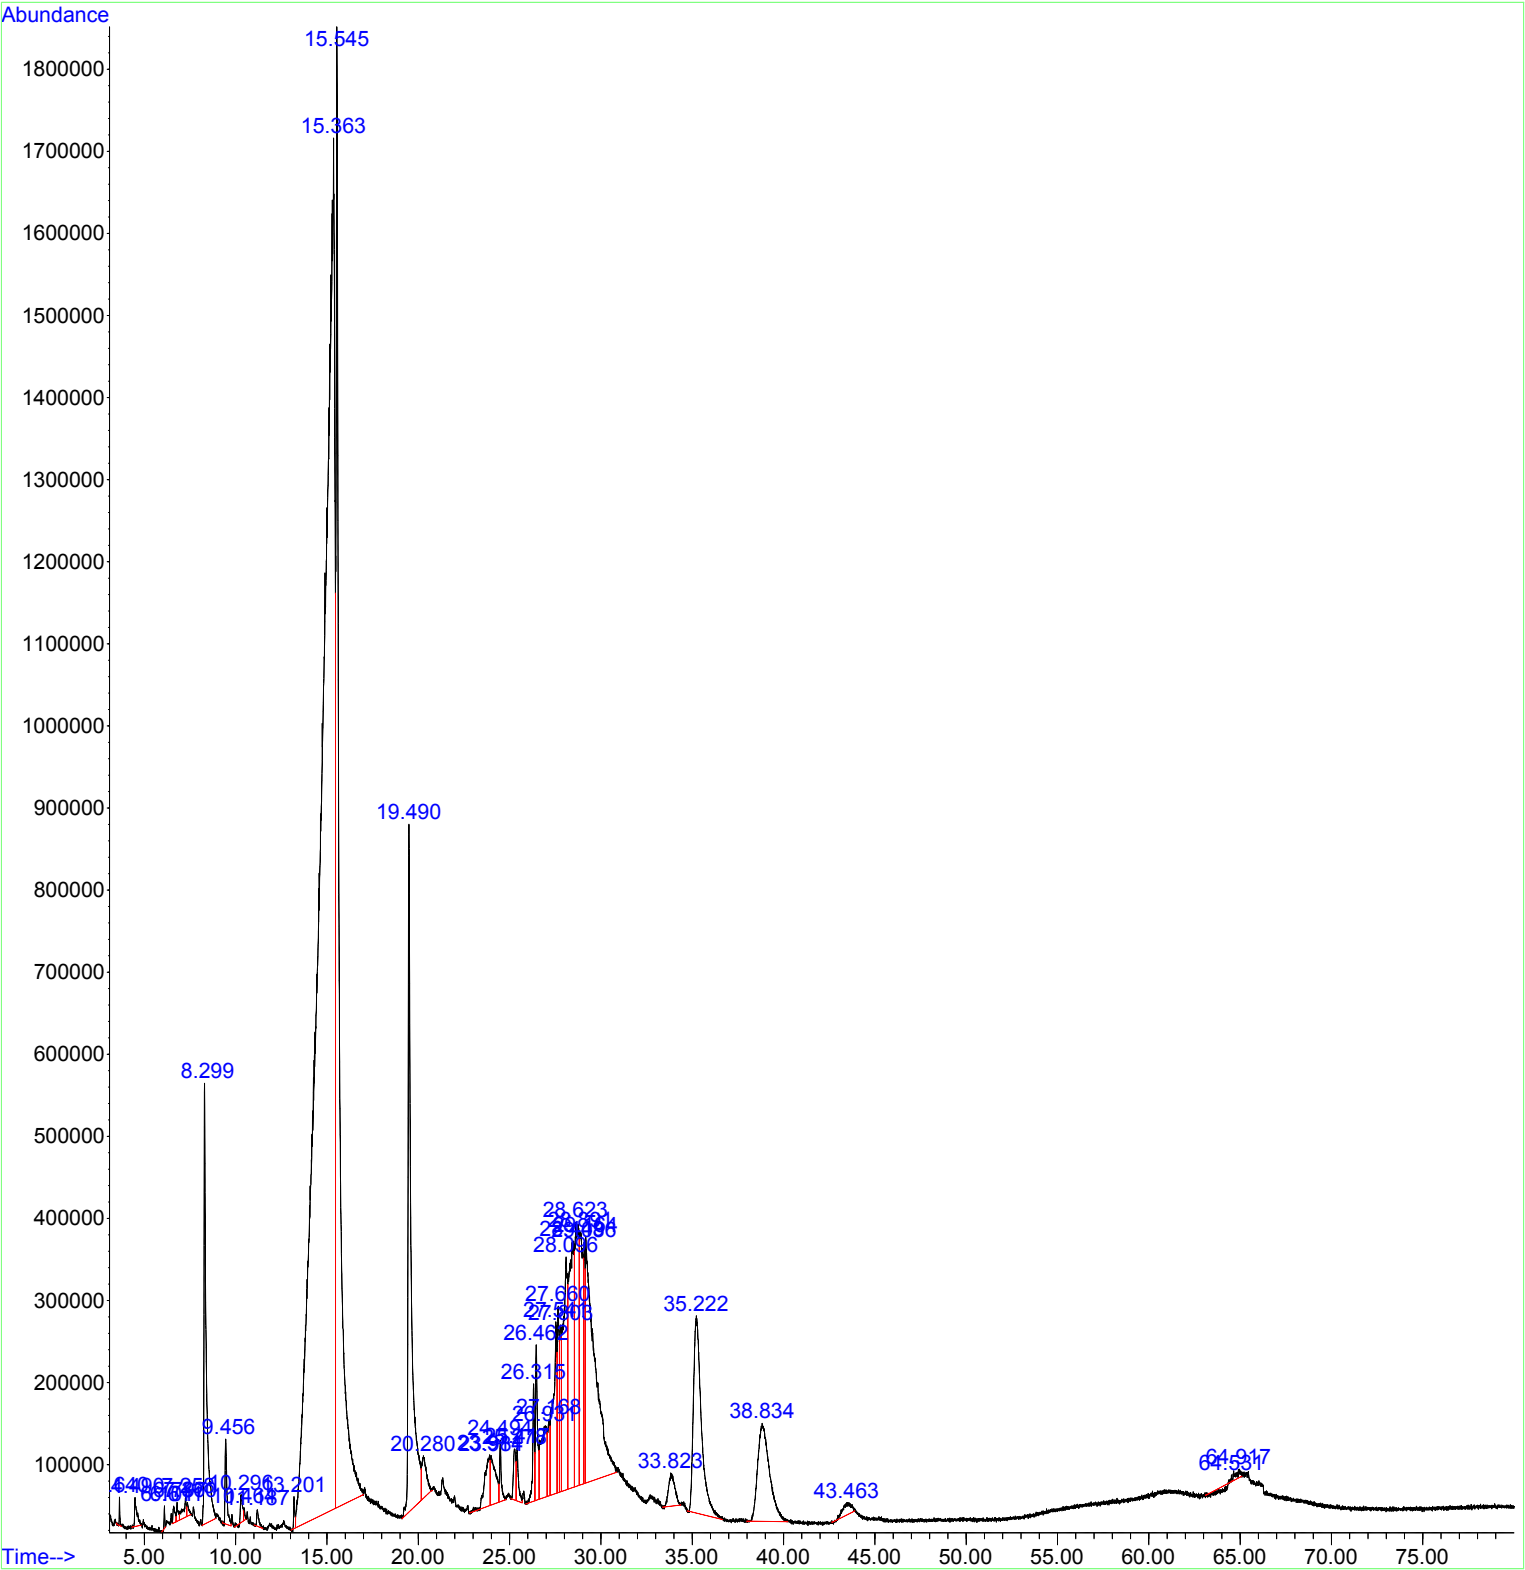

Acq On : 7 Mar 2019 8:25  
Operator :  
Sample : Apiary A 5  
Misc :  
ALS Vial : 11 Sample Multiplier: 1

Integration Parameters: autoint1.e  
Integrator: ChemStation

| peak<br># | R.T.<br>min | first<br>scan | max<br>scan | last<br>scan | PK<br>TY | peak<br>height | corr.<br>area | corr.<br>% max. | % of<br>total |
|-----------|-------------|---------------|-------------|--------------|----------|----------------|---------------|-----------------|---------------|
| ---       | ----        | -----         | -----       | -----        | ---      | -----          | -----         | -----           | -----         |
| 1         | 3.641       | 86            | 97          | 123          | BB       | 32645          | 817306        | 0.14%           | 0.083%        |
| 2         | 4.485       | 217           | 244         | 268          | BV 5     | 21072          | 884475        | 0.15%           | 0.090%        |
| 3         | 6.105       | 477           | 527         | 542          | BV 4     | 20347          | 336886        | 0.06%           | 0.034%        |
| 4         | 8.312       | 887           | 913         | 1046         | PV 2     | 512628         | 43326070      | 7.47%           | 4.419%        |
| 5         | 9.465       | 1086          | 1115        | 1162         | BV 2     | 82932          | 5159757       | 0.89%           | 0.526%        |
| 6         | 10.329      | 1219          | 1266        | 1283         | BV 4     | 30095          | 2276571       | 0.39%           | 0.232%        |
| 7         | 10.464      | 1283          | 1289        | 1311         | VV 4     | 15992          | 816163        | 0.14%           | 0.083%        |
| 8         | 11.208      | 1387          | 1419        | 1475         | BB 3     | 33313          | 2976856       | 0.51%           | 0.304%        |
| 9         | 15.037      | 1785          | 2088        | 2162         | VV 3     | 1084700        | 579925747     | 100.00%         | 59.151%       |
| 10        | 15.585      | 2162          | 2184        | 2435         | VV 3     | 1139711        | 171113712     | 29.51%          | 17.453%       |
| 11        | 19.512      | 2797          | 2871        | 2941         | BV 2     | 568297         | 71393854      | 12.31%          | 7.282%        |
| 12        | 19.945      | 2941          | 2946        | 2994         | VV 8     | 92204          | 12199678      | 2.10%           | 1.244%        |
| 13        | 20.291      | 2994          | 3007        | 3075         | VV 5     | 54193          | 9486326       | 1.64%           | 0.968%        |
| 14        | 21.372      | 3160          | 3196        | 3227         | BV 5     | 15992          | 1025660       | 0.18%           | 0.105%        |
| 15        | 24.506      | 3536          | 3743        | 3802         | BV 8     | 34748          | 15863103      | 2.74%           | 1.618%        |
| 16        | 25.364      | 3802          | 3893        | 3960         | VV 8     | 46687          | 10773395      | 1.86%           | 1.099%        |
| 17        | 26.324      | 4014          | 4061        | 4074         | BV 8     | 28309          | 849728        | 0.15%           | 0.087%        |
| 18        | 26.473      | 4074          | 4087        | 4110         | PV 6     | 28695          | 1443605       | 0.25%           | 0.147%        |
| 19        | 27.558      | 4110          | 4277        | 4287         | PV 6     | 27906          | 5552808       | 0.96%           | 0.566%        |
| 20        | 27.678      | 4287          | 4298        | 4335         | VB 6     | 20829          | 1689564       | 0.29%           | 0.172%        |
| 21        | 29.356      | 4441          | 4591        | 4640         | BB 6     | 12269          | 3845991       | 0.66%           | 0.392%        |
| 22        | 34.123      | 5340          | 5424        | 5531         | BB 6     | 21436          | 7318960       | 1.26%           | 0.747%        |
| 23        | 35.517      | 5563          | 5668        | 5829         | BB 6     | 36818          | 12948402      | 2.23%           | 1.321%        |
| 24        | 39.241      | 6168          | 6318        | 6539         | BB 4     | 32917          | 18391047      | 3.17%           | 1.876%        |

Sum of corrected areas: 980415665

File  
Operator :  
Acquired : 7 Mar 2019 8:25 using AcqMethod FOMETHOD.M  
Instrument : 5975 MSD  
Sample Name: Apiary A 5  
Misc Info :  
Vial Number: 11

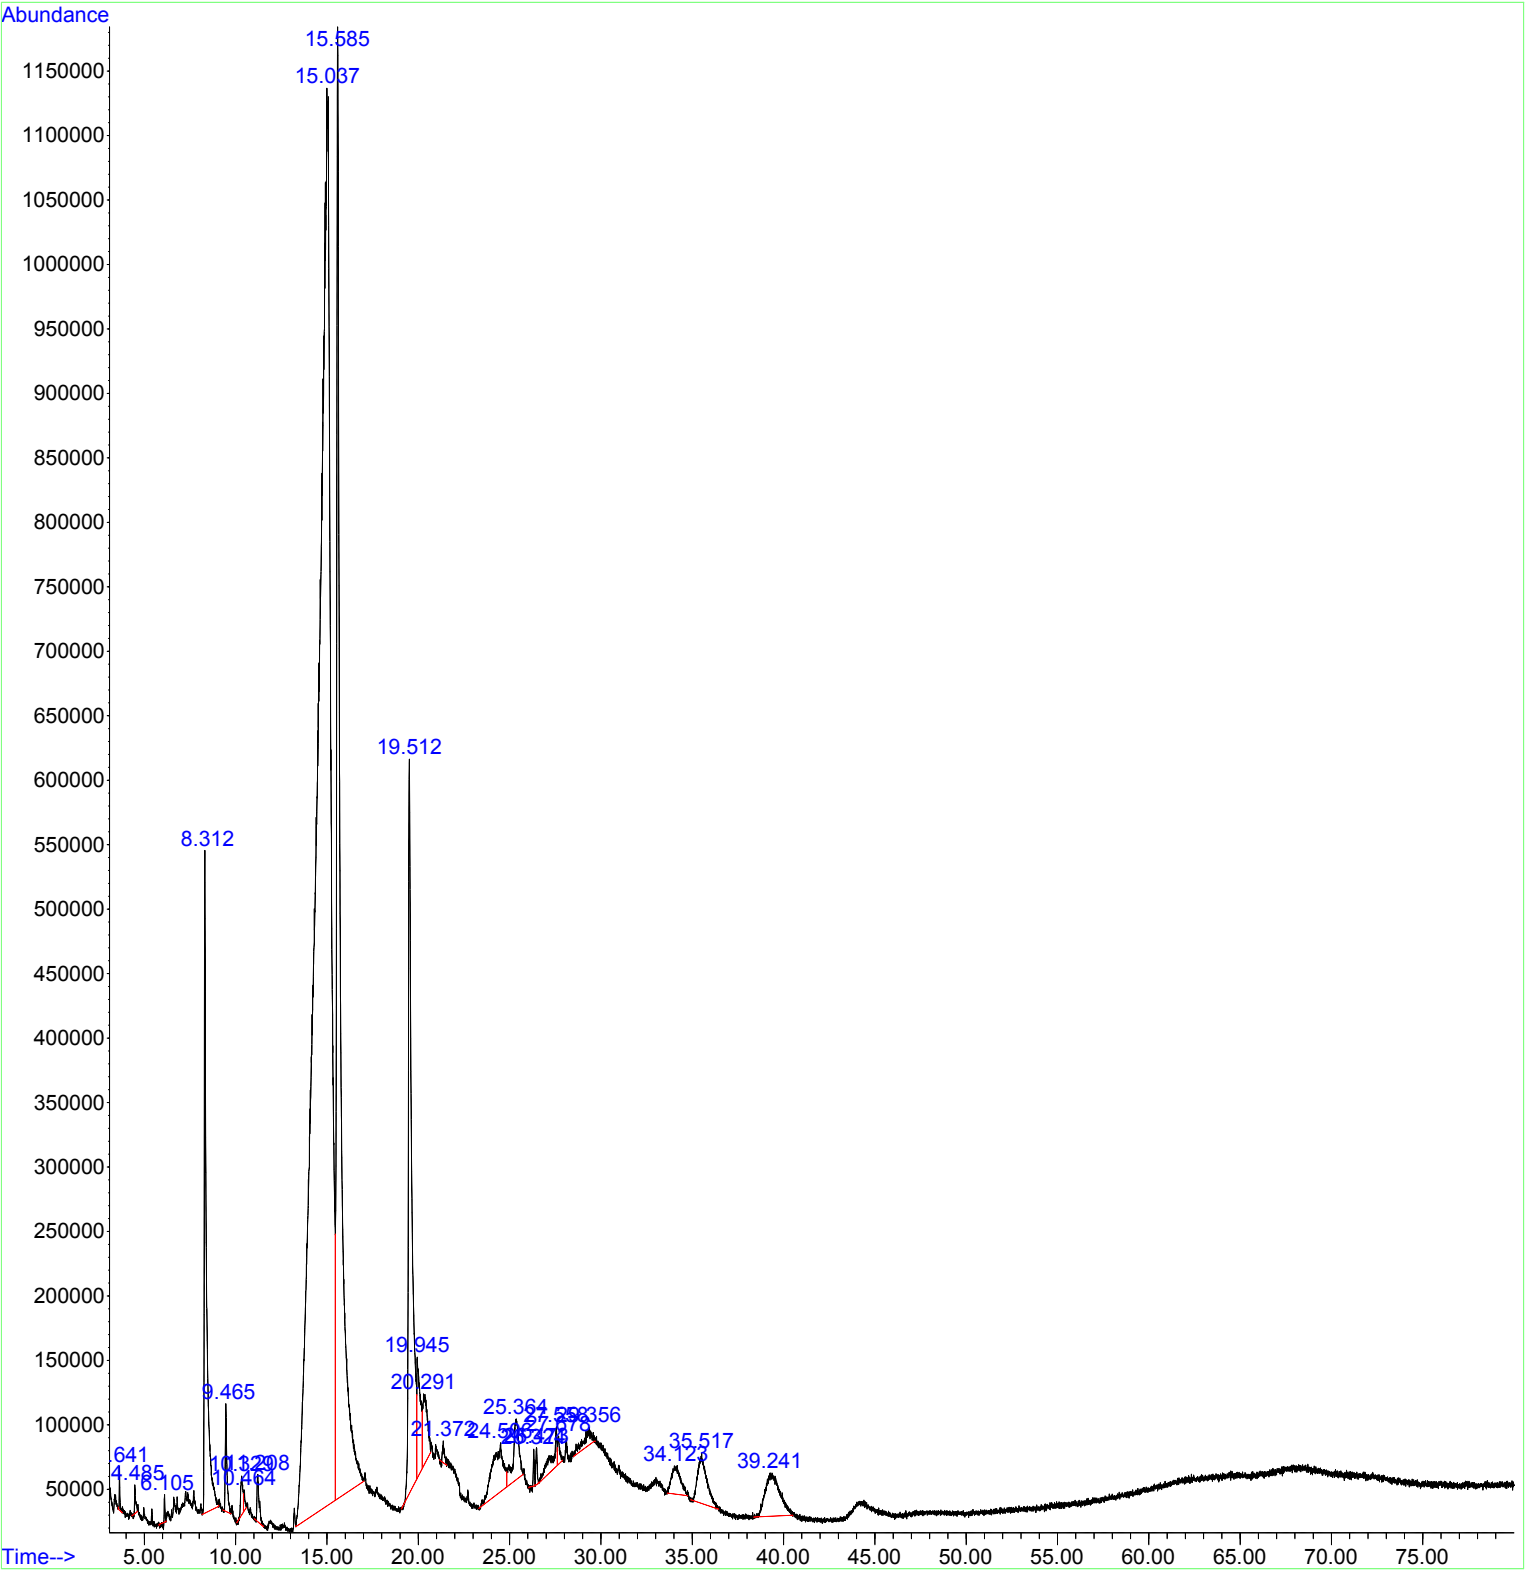

Acq On : 7 Mar 2019 9:54  
 Operator :  
 Sample : Apiary A 6  
 Misc :  
 ALS Vial : 12 Sample Multiplier: 1

Integration Parameters: autoint1.e  
 Integrator: ChemStation

| peak<br># | R.T.<br>min | first<br>scan | max<br>scan | last<br>scan | PK<br>TY | peak<br>height | corr.<br>area | corr.<br>% max. | % of<br>total |
|-----------|-------------|---------------|-------------|--------------|----------|----------------|---------------|-----------------|---------------|
| ---       | ----        | -----         | -----       | -----        | ---      | -----          | -----         | -----           | -----         |
| 1         | 3.642       | 78            | 97          | 120          | BB       | 19931          | 645635        | 0.15%           | 0.083%        |
| 2         | 4.480       | 219           | 243         | 268          | BV 2     | 29710          | 1029139       | 0.23%           | 0.132%        |
| 3         | 6.107       | 484           | 528         | 543          | BV 2     | 21195          | 682512        | 0.16%           | 0.088%        |
| 4         | 8.314       | 892           | 914         | 1031         | BV 2     | 534759         | 47938544      | 10.91%          | 6.164%        |
| 5         | 9.469       | 1077          | 1115        | 1168         | BV 2     | 77441          | 6064485       | 1.38%           | 0.780%        |
| 6         | 10.315      | 1207          | 1263        | 1282         | PV 4     | 22469          | 2019572       | 0.46%           | 0.260%        |
| 7         | 10.475      | 1282          | 1291        | 1317         | VB 5     | 23860          | 1160727       | 0.26%           | 0.149%        |
| 8         | 11.219      | 1373          | 1421        | 1506         | BV 3     | 47363          | 6443493       | 1.47%           | 0.828%        |
| 9         | 14.824      | 1786          | 2051        | 2164         | VV 2     | 878508         | 439270302     | 100.00%         | 56.480%       |
| 10        | 15.587      | 2164          | 2185        | 2426         | VB 2     | 769861         | 116890887     | 26.61%          | 15.029%       |
| 11        | 19.513      | 2801          | 2871        | 2998         | BV 2     | 498532         | 67728842      | 15.42%          | 8.708%        |
| 12        | 20.286      | 2998          | 3006        | 3039         | VB 2     | 14364          | 1196912       | 0.27%           | 0.154%        |
| 13        | 24.504      | 3611          | 3743        | 3796         | BB 9     | 45842          | 6921397       | 1.58%           | 0.890%        |
| 14        | 25.424      | 3796          | 3904        | 3949         | BV 9     | 36288          | 6682504       | 1.52%           | 0.859%        |
| 15        | 25.792      | 3949          | 3968        | 4000         | VB 9     | 24018          | 1490906       | 0.34%           | 0.192%        |
| 16        | 26.326      | 4025          | 4061        | 4074         | BV 5     | 120707         | 5232727       | 1.19%           | 0.673%        |
| 17        | 26.474      | 4074          | 4087        | 4115         | VB 3     | 112151         | 5588634       | 1.27%           | 0.719%        |
| 18        | 27.162      | 4188          | 4207        | 4220         | VV 3     | 24312          | 1548717       | 0.35%           | 0.199%        |
| 19        | 27.315      | 4220          | 4234        | 4252         | VV 3     | 17741          | 1785211       | 0.41%           | 0.230%        |
| 20        | 27.554      | 4252          | 4276        | 4286         | VV 9     | 59071          | 3839657       | 0.87%           | 0.494%        |
| 21        | 27.669      | 4286          | 4296        | 4346         | VB 9     | 61898          | 5301420       | 1.21%           | 0.682%        |
| 22        | 28.102      | 4348          | 4372        | 4398         | BV 9     | 31224          | 2056243       | 0.47%           | 0.264%        |
| 23        | 35.574      | 5581          | 5678        | 5738         | BB 9     | 17016          | 4376064       | 1.00%           | 0.563%        |
| 24        | 39.438      | 6151          | 6353        | 6614         | BB 7     | 44956          | 27846163      | 6.34%           | 3.580%        |
| 25        | 44.475      | 6932          | 7233        | 7339         | VV 5     | 16037          | 8102433       | 1.84%           | 1.042%        |
| 26        | 63.083      | 10090         | 10485       | 10520        | PV 5     | 1675           | 1886696       | 0.43%           | 0.243%        |
| 27        | 65.485      | 10520         | 10905       | 10940        | VV 5     | 3752           | 4019382       | 0.92%           | 0.517%        |

Sum of corrected areas: 777749204

File  
Operator :  
Acquired : 7 Mar 2019 9:54 using AcqMethod FOMETHOD.M  
Instrument : 5975 MSD  
Sample Name: Apiary A 6  
Misc Info :  
Vial Number: 12

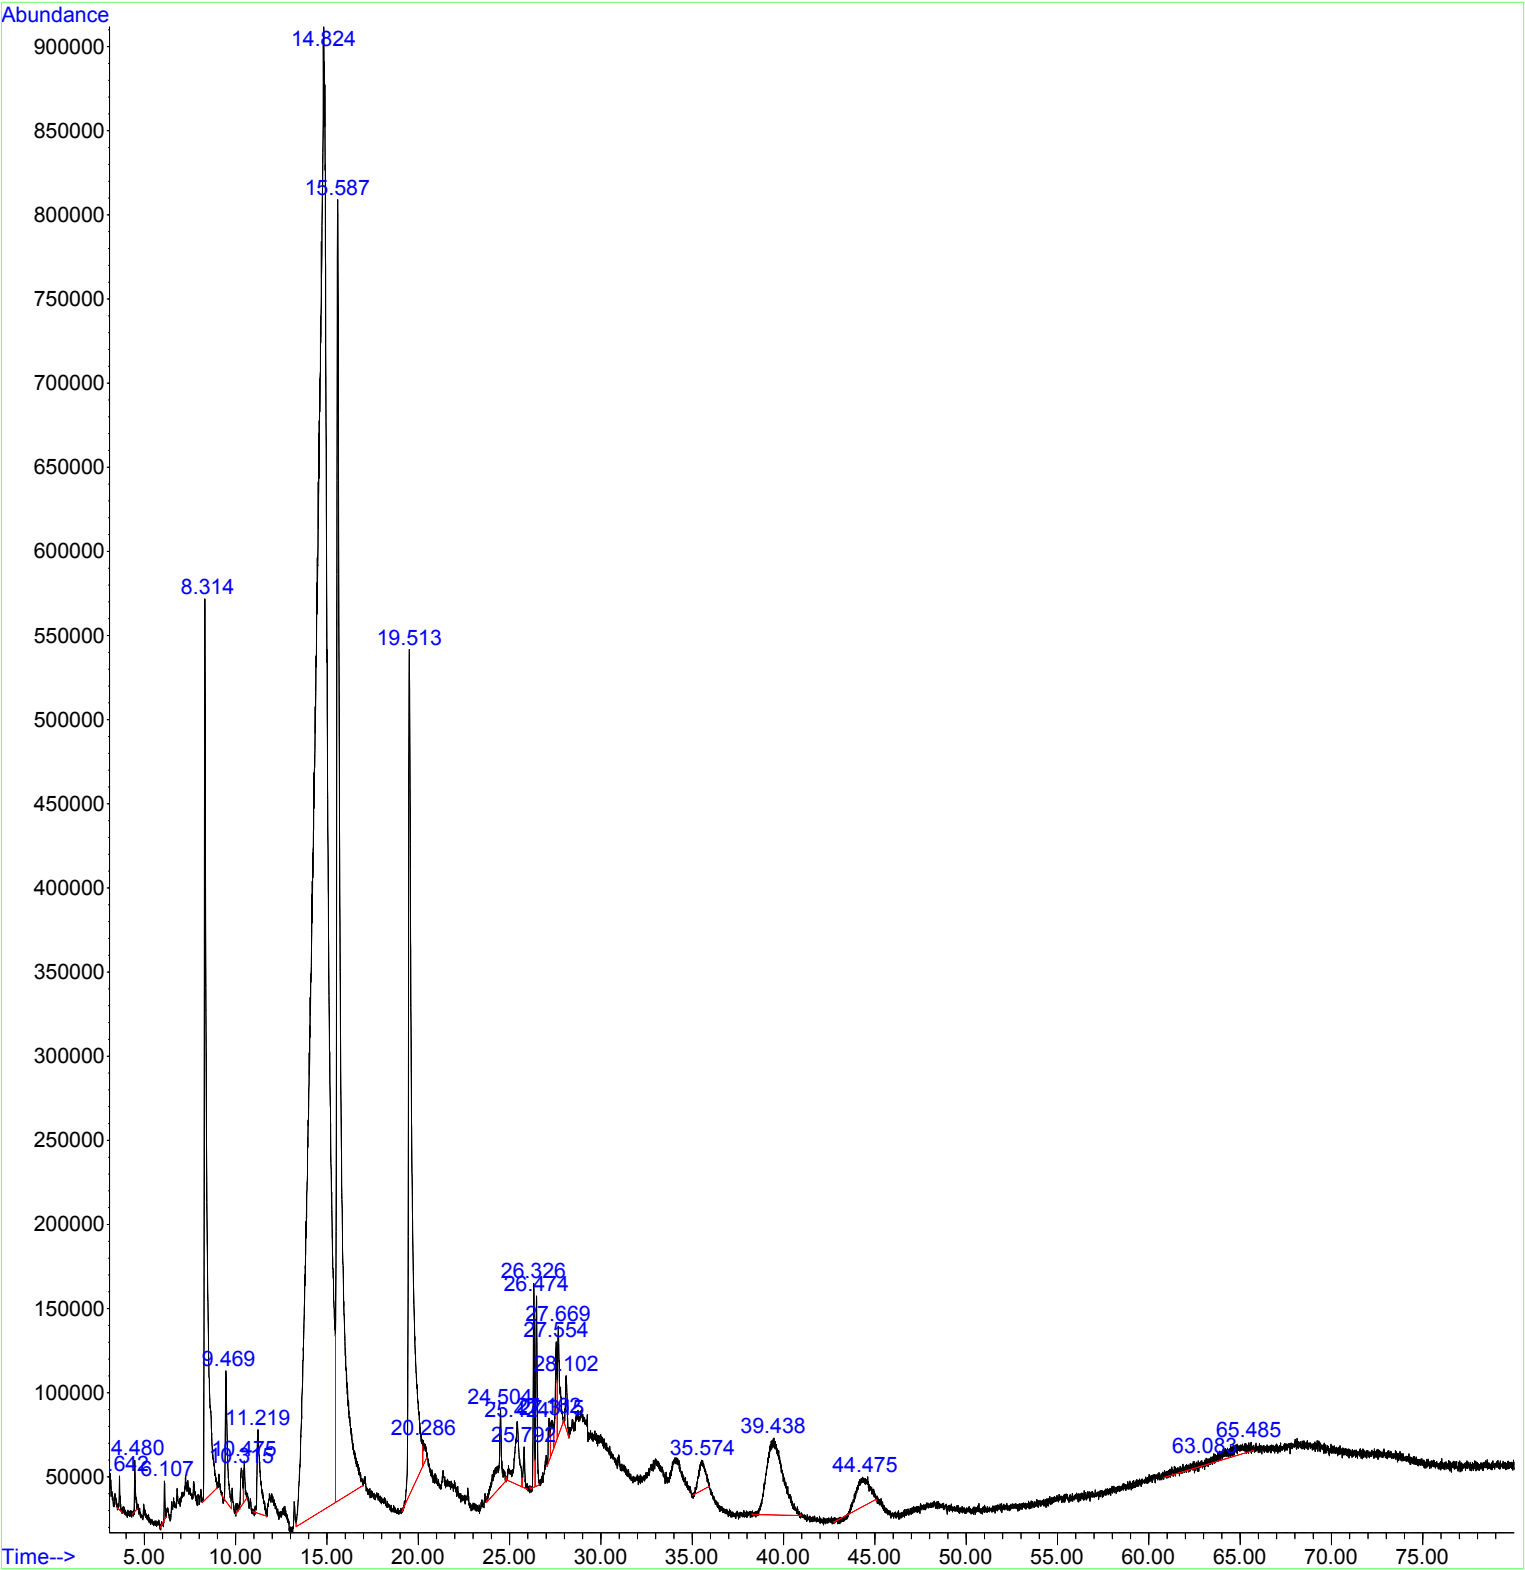



Acq On : 7 Mar 2019 11:24  
Operator :  
Sample : Apiary A 15  
Misc :  
ALS Vial : 13 Sample Multiplier: 1

Integration Parameters: autoint1.e  
Integrator: ChemStation

| peak<br># | R.T.<br>min | first<br>scan | max<br>scan | last<br>scan | PK<br>TY | peak<br>height | corr.<br>area | corr.<br>% max. | % of<br>total |
|-----------|-------------|---------------|-------------|--------------|----------|----------------|---------------|-----------------|---------------|
| ---       | ----        | -----         | -----       | -----        | ---      | -----          | -----         | -----           | -----         |
| 1         | 4.482       | 180           | 244         | 273          | BB 5     | 18127          | 815760        | 0.33%           | 0.223%        |
| 2         | 6.113       | 505           | 529         | 539          | BV 2     | 15267          | 301148        | 0.12%           | 0.082%        |
| 3         | 7.265       | 657           | 730         | 747          | BV 4     | 11227          | 580681        | 0.24%           | 0.159%        |
| 4         | 8.323       | 900           | 915         | 1002         | BV 2     | 242584         | 21797659      | 8.85%           | 5.971%        |
| 5         | 9.465       | 1074          | 1115        | 1168         | BV 4     | 38231          | 2559091       | 1.04%           | 0.701%        |
| 6         | 11.216      | 1402          | 1421        | 1491         | BB 4     | 24632          | 2869301       | 1.17%           | 0.786%        |
| 7         | 14.477      | 1783          | 1991        | 2160         | BV 2     | 543918         | 246253203     | 100.00%         | 67.455%       |
| 8         | 15.583      | 2160          | 2184        | 2369         | VB 3     | 414570         | 60205299      | 24.45%          | 16.492%       |
| 9         | 19.515      | 2752          | 2871        | 2993         | BB 3     | 199431         | 27680478      | 11.24%          | 7.582%        |
| 10        | 24.504      | 3537          | 3743        | 3771         | BB 3     | 9954           | 1849192       | 0.75%           | 0.507%        |
| 11        | 27.554      | 4132          | 4276        | 4286         | BV 3     | 7349           | 153169        | 0.06%           | 0.042%        |

Sum of corrected areas: 365064981

File  
Operator :  
Acquired : 7 Mar 2019 11:24 using AcqMethod FOMETHOD.M  
Instrument : 5975 MSD  
Sample Name: Apiary A 15  
Misc Info :  
Vial Number: 13

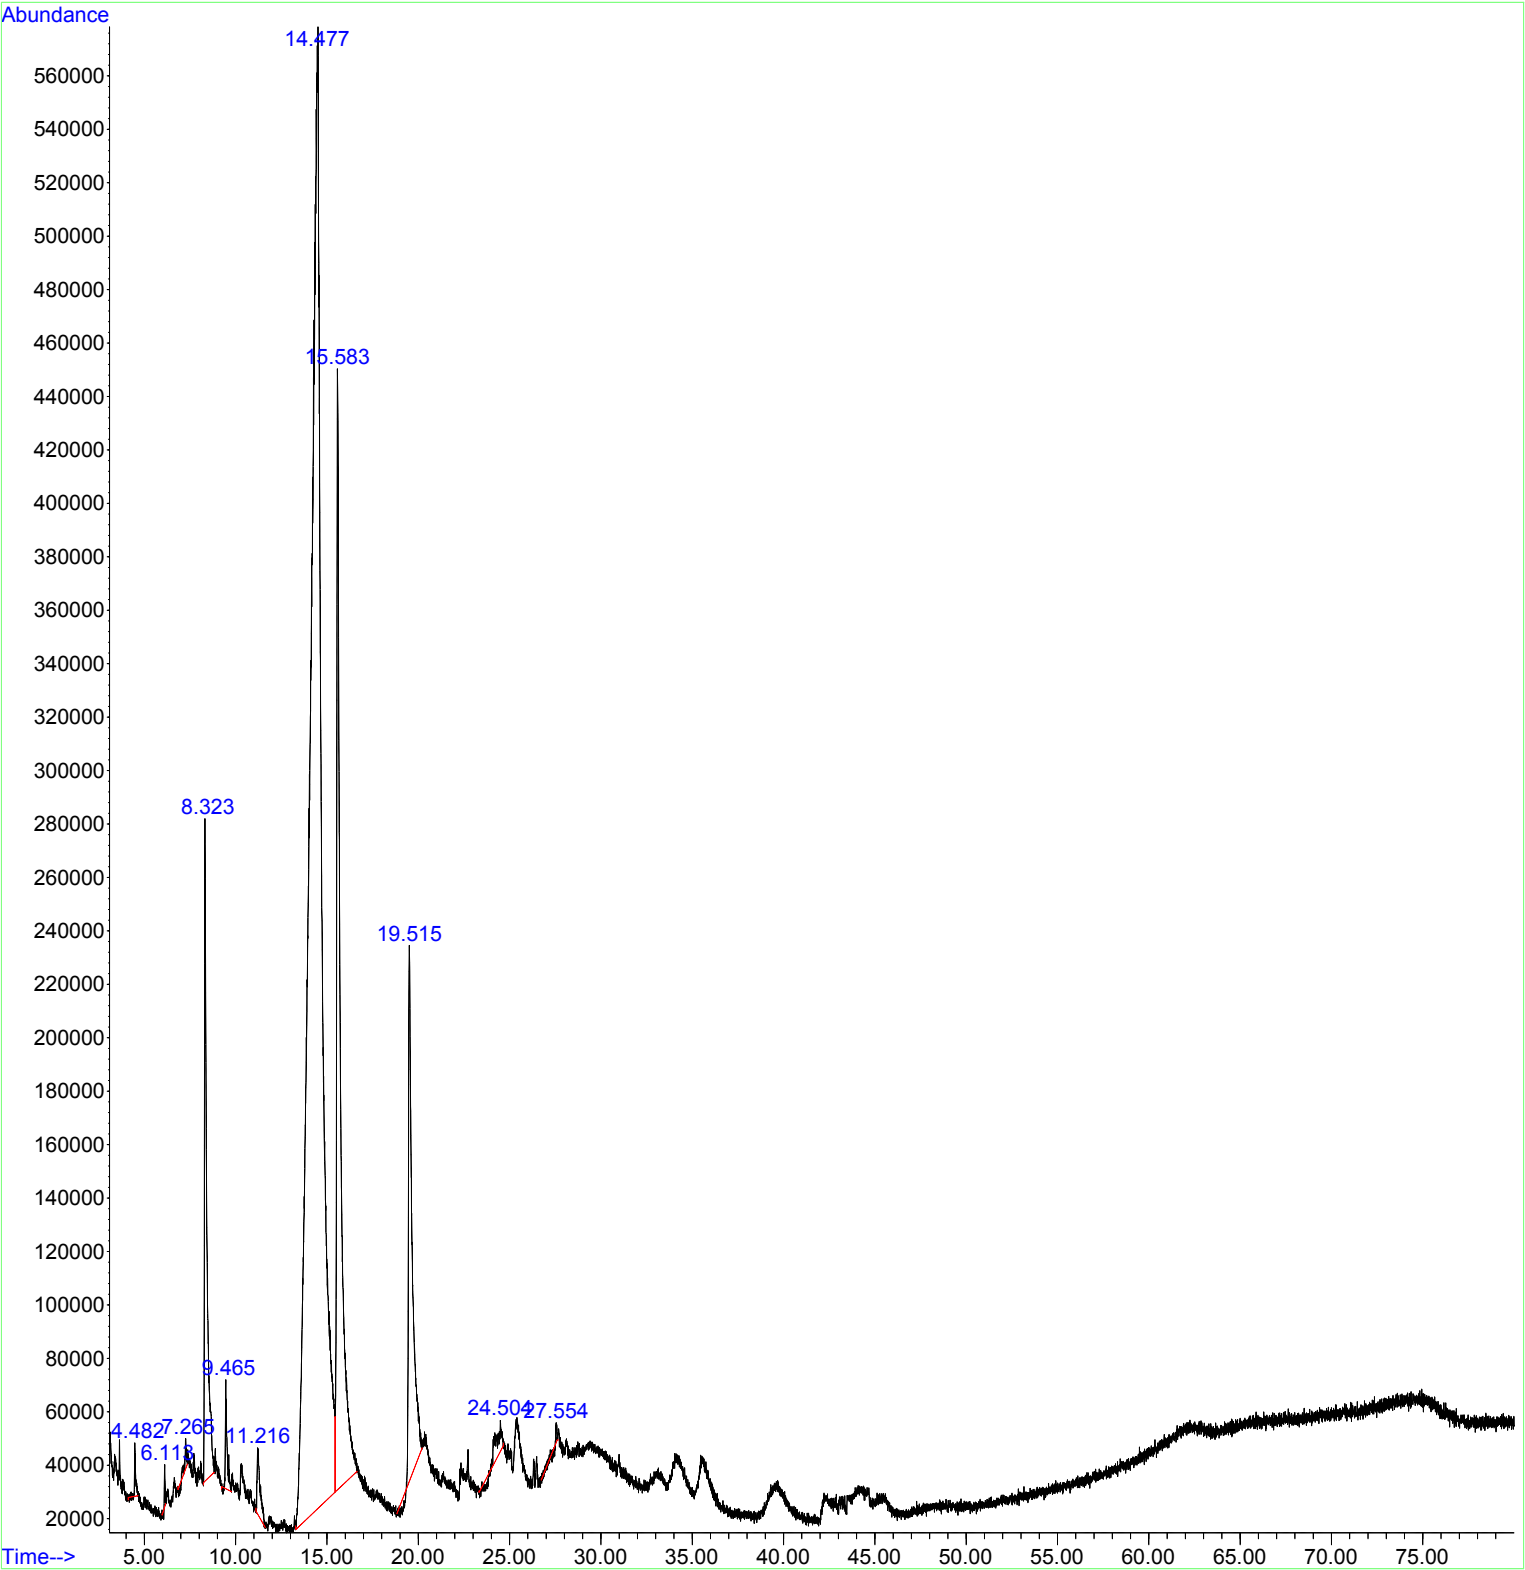

Acq On : 7 Mar 2019 12:53  
 Operator :  
 Sample : Apiary A 16  
 Misc :  
 ALS Vial : 14 Sample Multiplier: 1

Integration Parameters: autoint1.e  
 Integrator: ChemStation

| peak<br># | R.T.<br>min | first<br>scan | max<br>scan | last<br>scan | PK<br>TY | peak<br>height | corr.<br>area | corr.<br>% max. | % of<br>total |
|-----------|-------------|---------------|-------------|--------------|----------|----------------|---------------|-----------------|---------------|
| ---       | ----        | -----         | -----       | -----        | ---      | -----          | -----         | -----           | -----         |
| 1         | 4.480       | 198           | 244         | 269          | BV       | 38309          | 1333913       | 0.42%           | 0.240%        |
| 2         | 6.112       | 505           | 529         | 543          | BV 3     | 21156          | 558367        | 0.17%           | 0.100%        |
| 3         | 6.624       | 577           | 618         | 638          | BV 3     | 17550          | 920199        | 0.29%           | 0.165%        |
| 4         | 7.267       | 679           | 731         | 737          | BV 8     | 20265          | 1422348       | 0.44%           | 0.256%        |
| 5         | 7.389       | 737           | 752         | 797          | VB 6     | 28235          | 2735157       | 0.85%           | 0.491%        |
| 6         | 7.719       | 797           | 809         | 862          | BB 2     | 24910          | 1650267       | 0.51%           | 0.297%        |
| 7         | 8.319       | 897           | 914         | 984          | PV 2     | 465718         | 35818802      | 11.17%          | 6.436%        |
| 8         | 8.738       | 984           | 988         | 1037         | VV 2     | 23536          | 2091743       | 0.65%           | 0.376%        |
| 9         | 9.476       | 1101          | 1117        | 1166         | BV 3     | 50390          | 4161931       | 1.30%           | 0.748%        |
| 10        | 11.221      | 1390          | 1422        | 1476         | BB 3     | 22973          | 2040544       | 0.64%           | 0.367%        |
| 11        | 13.342      | 1780          | 1792        | 1803         | VV 3     | 22303          | 1159264       | 0.36%           | 0.208%        |
| 12        | 14.638      | 1803          | 2019        | 2144         | VV 4     | 700659         | 320551545     | 100.00%         | 57.597%       |
| 13        | 15.382      | 2144          | 2149        | 2160         | VV       | 93101          | 4637036       | 1.45%           | 0.833%        |
| 14        | 15.593      | 2160          | 2186        | 2262         | VV 2     | 615659         | 85440965      | 26.65%          | 15.352%       |
| 15        | 16.054      | 2262          | 2266        | 2427         | VV 5     | 81127          | 18226577      | 5.69%           | 3.275%        |
| 16        | 19.519      | 2803          | 2872        | 3059         | BB 2     | 229077         | 38758593      | 12.09%          | 6.964%        |
| 17        | 25.462      | 3857          | 3910        | 3950         | BB 2     | 16468          | 2552114       | 0.80%           | 0.459%        |
| 18        | 26.331      | 4034          | 4062        | 4076         | BV 6     | 25241          | 1007468       | 0.31%           | 0.181%        |
| 19        | 26.482      | 4076          | 4089        | 4123         | VB 6     | 21462          | 1235787       | 0.39%           | 0.222%        |
| 20        | 27.556      | 4140          | 4276        | 4286         | BV 6     | 11767          | 981929        | 0.31%           | 0.176%        |
| 21        | 27.691      | 4286          | 4300        | 4314         | VV 6     | 10347          | 601136        | 0.19%           | 0.108%        |
| 22        | 34.248      | 5341          | 5446        | 5517         | BB 6     | 17266          | 5157927       | 1.61%           | 0.927%        |
| 23        | 35.592      | 5576          | 5681        | 5843         | BB 6     | 24870          | 9697805       | 3.03%           | 1.743%        |
| 24        | 39.591      | 6204          | 6380        | 6551         | BB 5     | 24734          | 13803629      | 4.31%           | 2.480%        |

Sum of corrected areas: 556545046

File  
Operator :  
Acquired : 7 Mar 2019 12:53 using AcqMethod FOMETHOD.M  
Instrument : 5975 MSD  
Sample Name: Apiary A 16  
Misc Info :  
Vial Number: 14

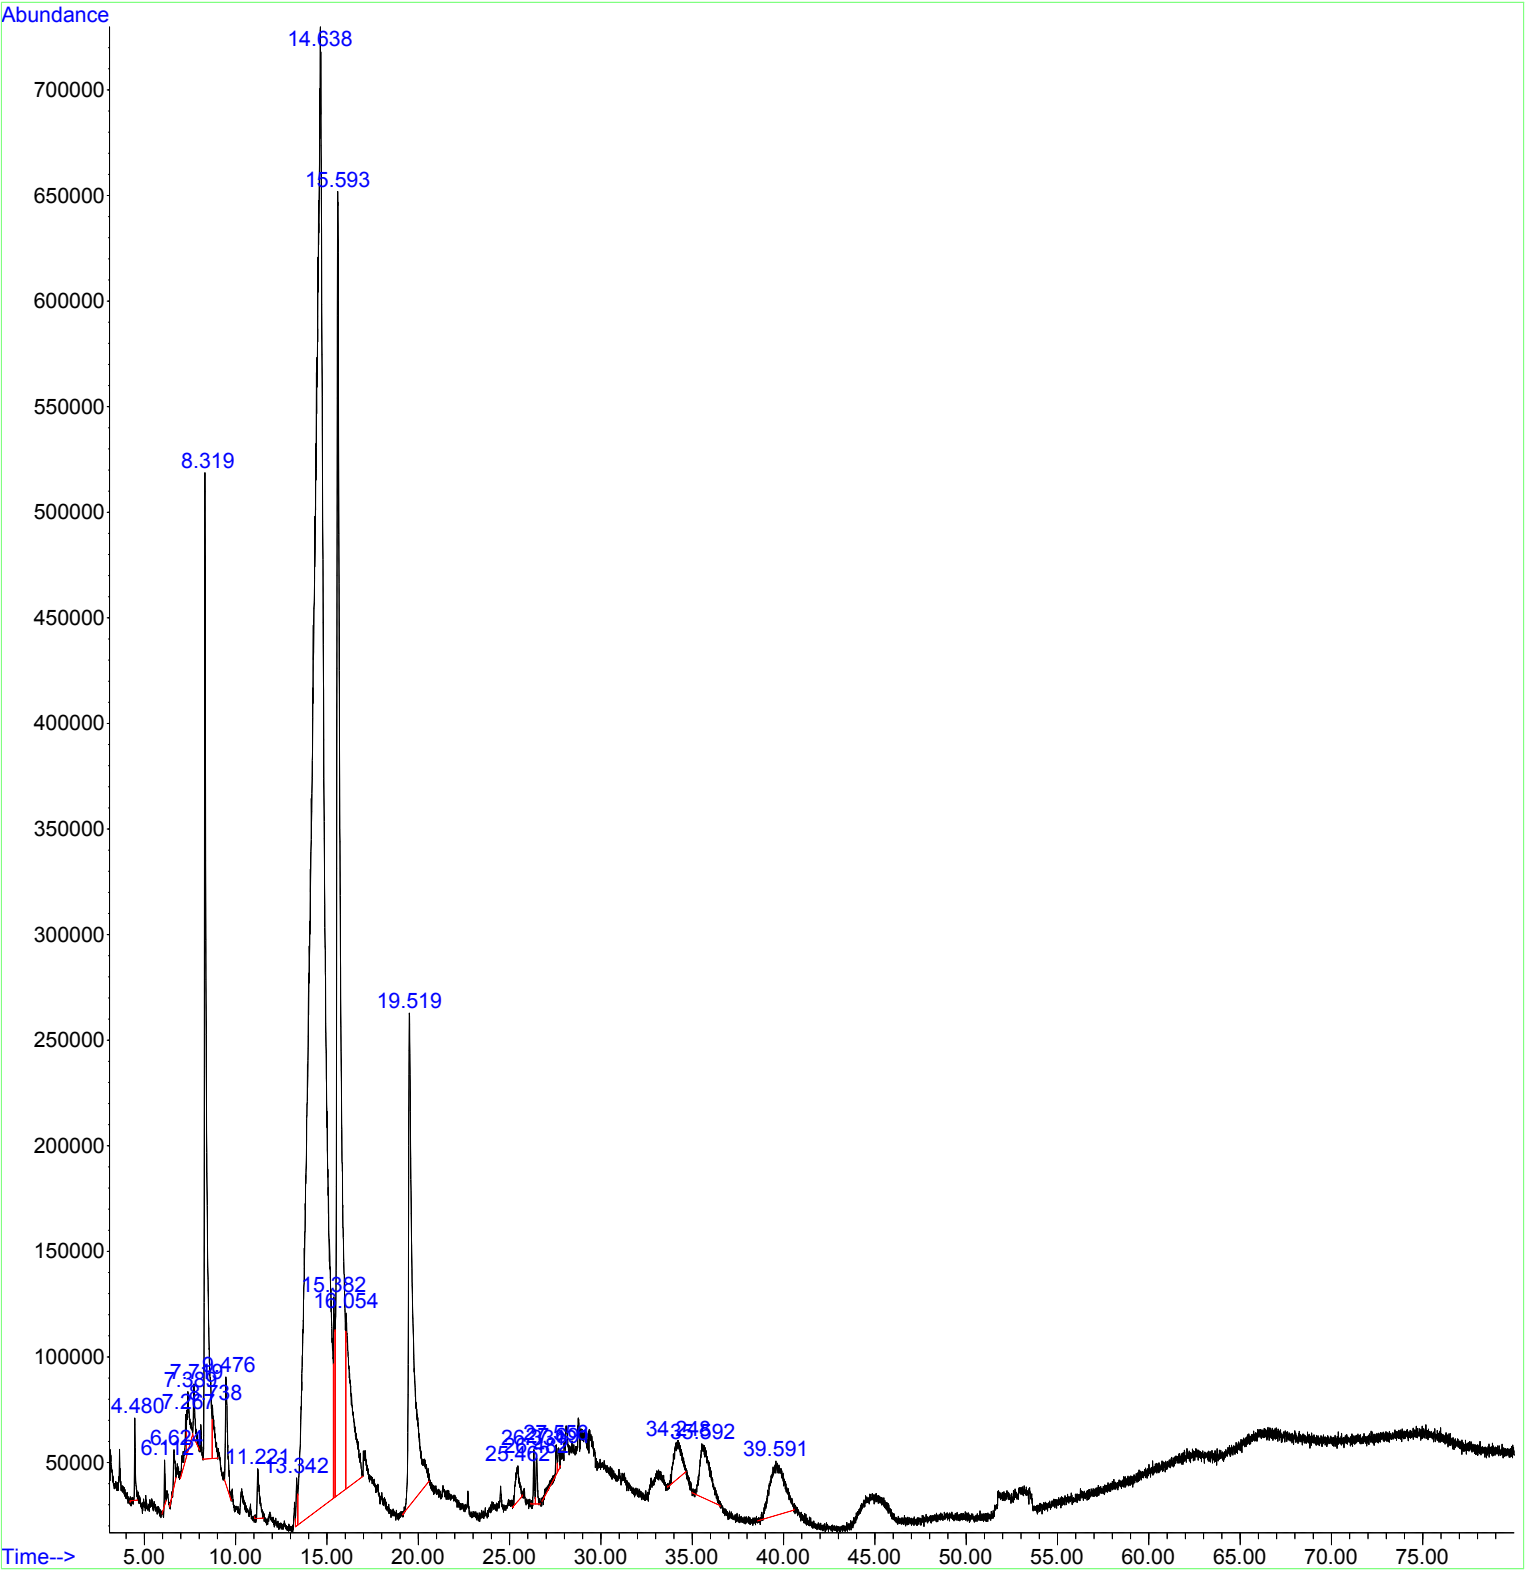

Acq On : 6 Mar 2019 18:59  
 Operator :  
 Sample : Apiary E 34 :  
 Misc  
 ALS Vial : 2 Sample Multiplier: 1

Integration Parameters: autoint1.e  
 Integrator: ChemStation

| peak<br># | R.T.<br>min | first<br>scan | max<br>scan | last<br>scan | PK<br>TY | peak<br>height | corr.<br>area | corr.<br>% max. | % of<br>total |
|-----------|-------------|---------------|-------------|--------------|----------|----------------|---------------|-----------------|---------------|
| ---       | ---         | ---           | ---         | ---          | ---      | ---            | ---           | ---             | ---           |
| 1         | 3.628       | 82            | 95          | 117          | BB       | 46097          | 970888        | 0.12%           | 0.061%        |
| 2         | 8.277       | 851           | 907         | 1024         | BB 2     | 656461         | 50446426      | 6.11%           | 3.171%        |
| 3         | 9.434       | 1084          | 1109        | 1157         | BB 2     | 96870          | 6004038       | 0.73%           | 0.377%        |
| 4         | 13.189      | 1737          | 1766        | 1773         | BV 2     | 49725          | 2288441       | 0.28%           | 0.144%        |
| 5         | 15.075      | 1773          | 2095        | 2146         | VV 4     | 1585728        | 825358655     | 100.00%         | 51.888%       |
| 6         | 15.483      | 2146          | 2166        | 2321         | VB 2     | 2360726        | 169505282     | 20.54%          | 10.656%       |
| 7         | 19.210      | 2779          | 2818        | 2838         | BV 7     | 132916         | 12048823      | 1.46%           | 0.757%        |
| 8         | 19.429      | 2838          | 2856        | 2967         | VV       | 1137570        | 87210643      | 10.57%          | 5.483%        |
| 9         | 20.170      | 2967          | 2985        | 3044         | VB 2     | 79135          | 7832810       | 0.95%           | 0.492%        |
| 10        | 22.683      | 3265          | 3425        | 3472         | BB 2     | 38620          | 10178944      | 1.23%           | 0.640%        |
| 11        | 23.316      | 3472          | 3535        | 3701         | BB 5     | 284813         | 67450636      | 8.17%           | 4.240%        |
| 12        | 25.125      | 3765          | 3852        | 3863         | BV 8     | 118731         | 9713122       | 1.18%           | 0.611%        |
| 13        | 26.285      | 3863          | 4054        | 4069         | VV 7     | 447403         | 205081498     | 24.85%          | 12.893%       |
| 14        | 26.412      | 4069          | 4076        | 4232         | VB 8     | 417568         | 61377903      | 7.44%           | 3.859%        |
| 15        | 33.383      | 5163          | 5295        | 5369         | BB 8     | 75769          | 16196442      | 1.96%           | 1.018%        |
| 16        | 34.631      | 5459          | 5513        | 5587         | BB 7     | 284080         | 31133085      | 3.77%           | 1.957%        |
| 17        | 37.867      | 6018          | 6078        | 6160         | BB 3     | 190267         | 27865494      | 3.38%           | 1.752%        |

Sum of corrected areas: 1590663129

Acq On : 6 Mar 2019 20:29  
Operator :  
Sample : Apiary E 36 :  
Misc  
ALS Vial : 3 Sample Multiplier: 1

Integration Parameters: autoint1.e  
Integrator: ChemStation

| peak<br># | R.T.<br>min | first<br>scan | max<br>scan | last<br>scan | PK<br>TY | peak<br>height | corr.<br>area | corr.<br>% max. | % of<br>total |
|-----------|-------------|---------------|-------------|--------------|----------|----------------|---------------|-----------------|---------------|
| ---       | ---         | ---           | ---         | ---          | ---      | ---            | ---           | ---             | ---           |
| 1         | 3.630       | 88            | 95          | 114          | BV       | 31648          | 714761        | 0.10%           | 0.055%        |
| 2         | 8.279       | 880           | 907         | 960          | BV 2     | 231018         | 14635115      | 2.04%           | 1.131%        |
| 3         | 9.438       | 1061          | 1110        | 1161         | BB 3     | 76229          | 4775206       | 0.66%           | 0.369%        |
| 4         | 13.190      | 1748          | 1766        | 1768         | BV 4     | 30247          | 829564        | 0.12%           | 0.064%        |
| 5         | 14.980      | 1768          | 2079        | 2143         | VV 3     | 1467663        | 718892441     | 100.00%         | 55.560%       |
| 6         | 15.363      | 2143          | 2145        | 2149         | VV       | 68253          | 1192421       | 0.17%           | 0.092%        |
| 7         | 15.488      | 2149          | 2167        | 2310         | VV 2     | 1351425        | 102648202     | 14.28%          | 7.933%        |
| 8         | 19.226      | 2793          | 2821        | 2840         | BV 2     | 86156          | 7545099       | 1.05%           | 0.583%        |
| 9         | 19.440      | 2840          | 2858        | 2972         | VV 2     | 862213         | 75776579      | 10.54%          | 5.856%        |
| 10        | 20.199      | 2972          | 2991        | 3057         | VB 2     | 72907          | 8370395       | 1.16%           | 0.647%        |
| 11        | 23.427      | 3495          | 3555        | 3635         | BV 5     | 117960         | 23951379      | 3.33%           | 1.851%        |
| 12        | 25.148      | 3835          | 3856        | 3888         | PV 4     | 136486         | 11456053      | 1.59%           | 0.885%        |
| 13        | 25.748      | 3888          | 3960        | 3963         | VV 4     | 199979         | 28206053      | 3.92%           | 2.180%        |
| 14        | 25.969      | 3963          | 3999        | 4001         | VV 8     | 246649         | 28224891      | 3.93%           | 2.181%        |
| 15        | 26.130      | 4001          | 4027        | 4032         | VV 8     | 270642         | 27126303      | 3.77%           | 2.096%        |
| 16        | 26.292      | 4032          | 4055        | 4066         | VV 8     | 334703         | 35040869      | 4.87%           | 2.708%        |
| 17        | 26.433      | 4066          | 4080        | 4254         | VV 9     | 386536         | 96412686      | 13.41%          | 7.451%        |
| 18        | 27.507      | 4254          | 4268        | 4279         | PV 7     | 48053          | 1874492       | 0.26%           | 0.145%        |
| 19        | 33.486      | 5240          | 5313        | 5398         | BV 7     | 82052          | 16082823      | 2.24%           | 1.243%        |
| 20        | 34.763      | 5488          | 5536        | 5630         | BV 7     | 302019         | 41579170      | 5.78%           | 3.213%        |
| 21        | 38.091      | 6043          | 6118        | 6246         | BV 3     | 257571         | 48567218      | 6.76%           | 3.754%        |

Sum of corrected areas: 1293901721

File  
Operator :  
Acquired : 6 Mar 2019 20:29 using AcqMethod FOMETHOD.M  
Instrument : 5975 MSD  
Sample Name: Apiary E 36  
Misc Info :  
Vial Number: 3

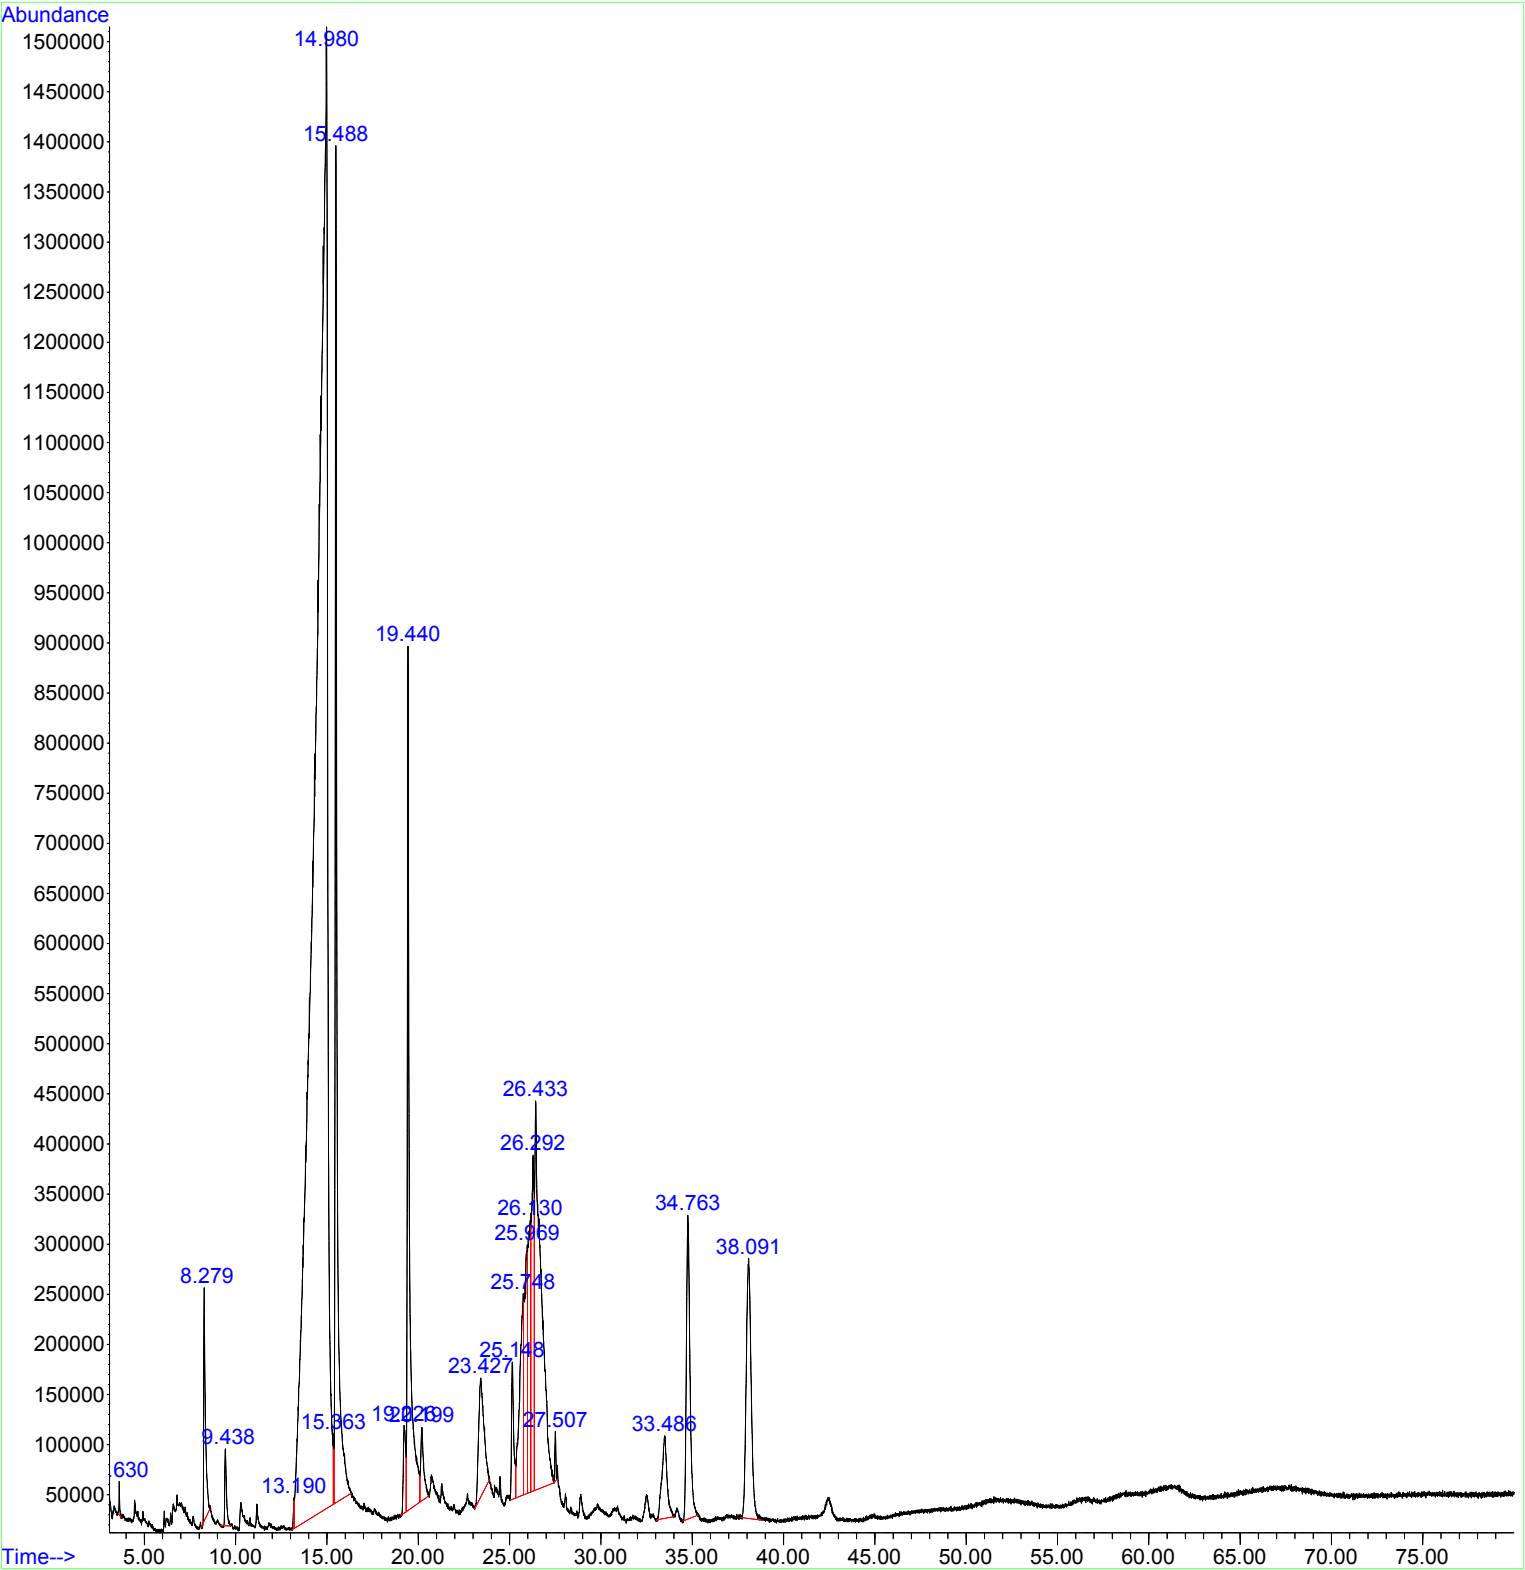

Acq On : 6 Mar 2019 21:58  
Operator :  
Sample : Apiary E 38 :  
Misc  
ALS Vial : 4 Sample Multiplier: 1

Integration Parameters: autoint1.e  
Integrator: ChemStation

| peak<br># | R.T.<br>min | first<br>scan | max<br>scan | last<br>scan | PK<br>TY | peak<br>height | corr.<br>area | corr.<br>% max. | % of<br>total |
|-----------|-------------|---------------|-------------|--------------|----------|----------------|---------------|-----------------|---------------|
| ---       | ----        | -----         | -----       | -----        | ---      | -----          | -----         | -----           | -----         |
| 1         | 6.789       | 637           | 647         | 673          | VB 5     | 40386          | 1215824       | 0.08%           | 0.055%        |
| 2         | 8.283       | 889           | 908         | 1021         | PV       | 476661         | 34558457      | 2.24%           | 1.551%        |
| 3         | 9.438       | 1073          | 1110        | 1163         | BB 2     | 122251         | 7247841       | 0.47%           | 0.325%        |
| 4         | 10.287      | 1223          | 1258        | 1308         | BV 5     | 43902          | 4135729       | 0.27%           | 0.186%        |
| 5         | 15.522      | 1774          | 2173        | 2416         | VV 5     | 4522553        | 1544467611    | 100.00%         | 69.335%       |
| 6         | 17.051      | 2416          | 2440        | 2481         | VB 9     | 17465          | 1964333       | 0.13%           | 0.088%        |
| 7         | 19.308      | 2777          | 2835        | 2842         | BV 10    | 94220          | 7119025       | 0.46%           | 0.320%        |
| 8         | 19.464      | 2842          | 2862        | 2974         | VV       | 1643202        | 146948013     | 9.51%           | 6.597%        |
| 9         | 20.224      | 2974          | 2995        | 3069         | VV 3     | 111245         | 15123466      | 0.98%           | 0.679%        |
| 10        | 23.542      | 3499          | 3575        | 3727         | BV 5     | 131628         | 41423009      | 2.68%           | 1.860%        |
| 11        | 24.483      | 3727          | 3739        | 3778         | VB 4     | 79408          | 3886815       | 0.25%           | 0.174%        |
| 12        | 25.188      | 3840          | 3863        | 3891         | BV 6     | 185906         | 14957903      | 0.97%           | 0.671%        |
| 13        | 25.402      | 3891          | 3900        | 3918         | VV 9     | 53671          | 2708214       | 0.18%           | 0.122%        |
| 14        | 26.296      | 3918          | 4056        | 4068         | VV 8     | 292725         | 58843898      | 3.81%           | 2.642%        |
| 15        | 26.440      | 4068          | 4081        | 4103         | VV 5     | 357165         | 29539972      | 1.91%           | 1.326%        |
| 16        | 27.173      | 4103          | 4210        | 4257         | VV 7     | 308217         | 139423124     | 9.03%           | 6.259%        |
| 17        | 27.516      | 4257          | 4269        | 4353         | VV 7     | 422484         | 47313863      | 3.06%           | 2.124%        |
| 18        | 33.559      | 5255          | 5325        | 5416         | BV 7     | 83178          | 17500935      | 1.13%           | 0.786%        |
| 19        | 34.876      | 5495          | 5556        | 5706         | BB 7     | 416599         | 71659587      | 4.64%           | 3.217%        |
| 20        | 38.246      | 6049          | 6145        | 6268         | BB 4     | 160330         | 37515705      | 2.43%           | 1.684%        |

Sum of corrected areas: 2227553325



File  
Operator :  
Acquired : 6 Mar 2019 21:58 using AcqMethod FOMETHOD.M  
Instrument : 5975 MSD  
Sample Name: Apiary E 38  
Misc Info :  
Vial Number: 4

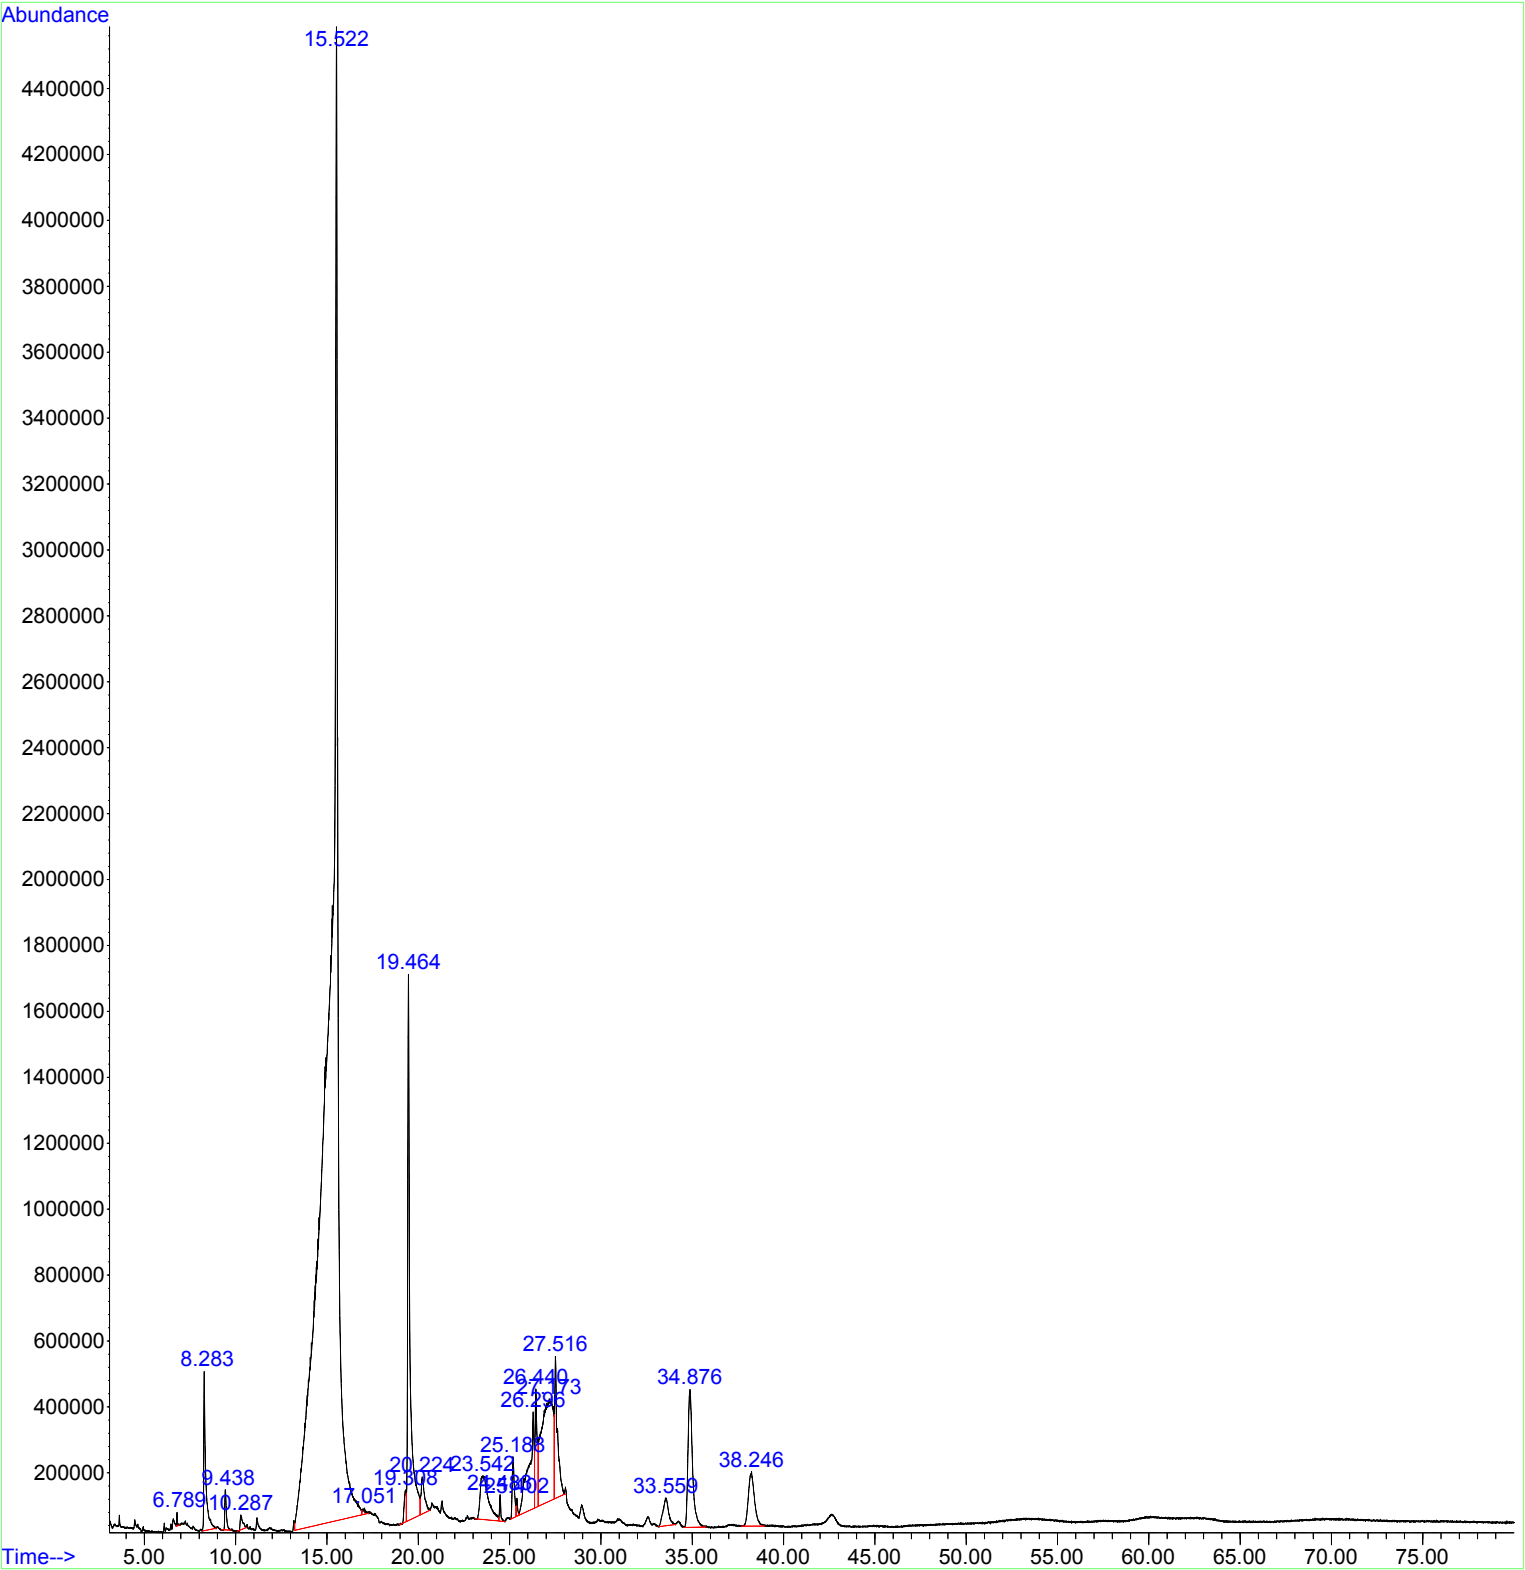

Acq On : 6 Mar 2019 23:28  
 Operator :  
 Sample : Apiary E 45 :  
 Misc  
 ALS Vial : 5 Sample Multiplier: 1

Integration Parameters: autoint1.e  
 Integrator: ChemStation

| peak<br># | R.T.<br>min | first<br>scan | max<br>scan | last<br>scan | PK<br>TY | peak<br>height | corr.<br>area | corr.<br>% max. | % of<br>total |
|-----------|-------------|---------------|-------------|--------------|----------|----------------|---------------|-----------------|---------------|
| ---       | ----        | -----         | -----       | -----        | ---      | -----          | -----         | -----           | -----         |
| 1         | 8.290       | 889           | 909         | 1019         | BB 3     | 350095         | 27078630      | 8.62%           | 3.782%        |
| 2         | 9.450       | 1074          | 1112        | 1166         | BV 3     | 66558          | 4681217       | 1.49%           | 0.654%        |
| 3         | 14.456      | 1774          | 1987        | 2147         | VV 3     | 784026         | 314281059     | 100.00%         | 43.897%       |
| 4         | 15.511      | 2147          | 2171        | 2342         | VB 2     | 841848         | 76206420      | 24.25%          | 10.644%       |
| 5         | 19.456      | 2735          | 2861        | 2979         | BV 2     | 485097         | 55949945      | 17.80%          | 7.815%        |
| 6         | 23.655      | 3445          | 3595        | 3697         | PB 5     | 47631          | 14701001      | 4.68%           | 2.053%        |
| 7         | 26.299      | 3924          | 4057        | 4068         | PV 8     | 108841         | 17231542      | 5.48%           | 2.407%        |
| 8         | 26.439      | 4068          | 4081        | 4105         | VV 9     | 120097         | 11550787      | 3.68%           | 1.613%        |
| 9         | 27.110      | 4105          | 4198        | 4228         | VV 9     | 104523         | 39364262      | 12.53%          | 5.498%        |
| 10        | 27.506      | 4228          | 4268        | 4279         | VV 9     | 87616          | 14333134      | 4.56%           | 2.002%        |
| 11        | 27.630      | 4279          | 4289        | 4353         | VV 9     | 84195          | 9822329       | 3.13%           | 1.372%        |
| 12        | 33.668      | 5265          | 5345        | 5428         | BB 9     | 62960          | 14424323      | 4.59%           | 2.015%        |
| 13        | 34.985      | 5513          | 5575        | 5743         | BB 9     | 393038         | 83353366      | 26.52%          | 11.642%       |
| 14        | 38.399      | 6071          | 6171        | 6313         | BB 4     | 117379         | 32977036      | 10.49%          | 4.606%        |

Sum of corrected areas: 715955049

H

File  
Operator :  
Acquired : 6 Mar 2019 23:28 using AcqMethod FOMETHOD.M  
Instrument : 5975 MSD  
Sample Name: Apiary E 45  
Misc Info :  
Vial Number: 5

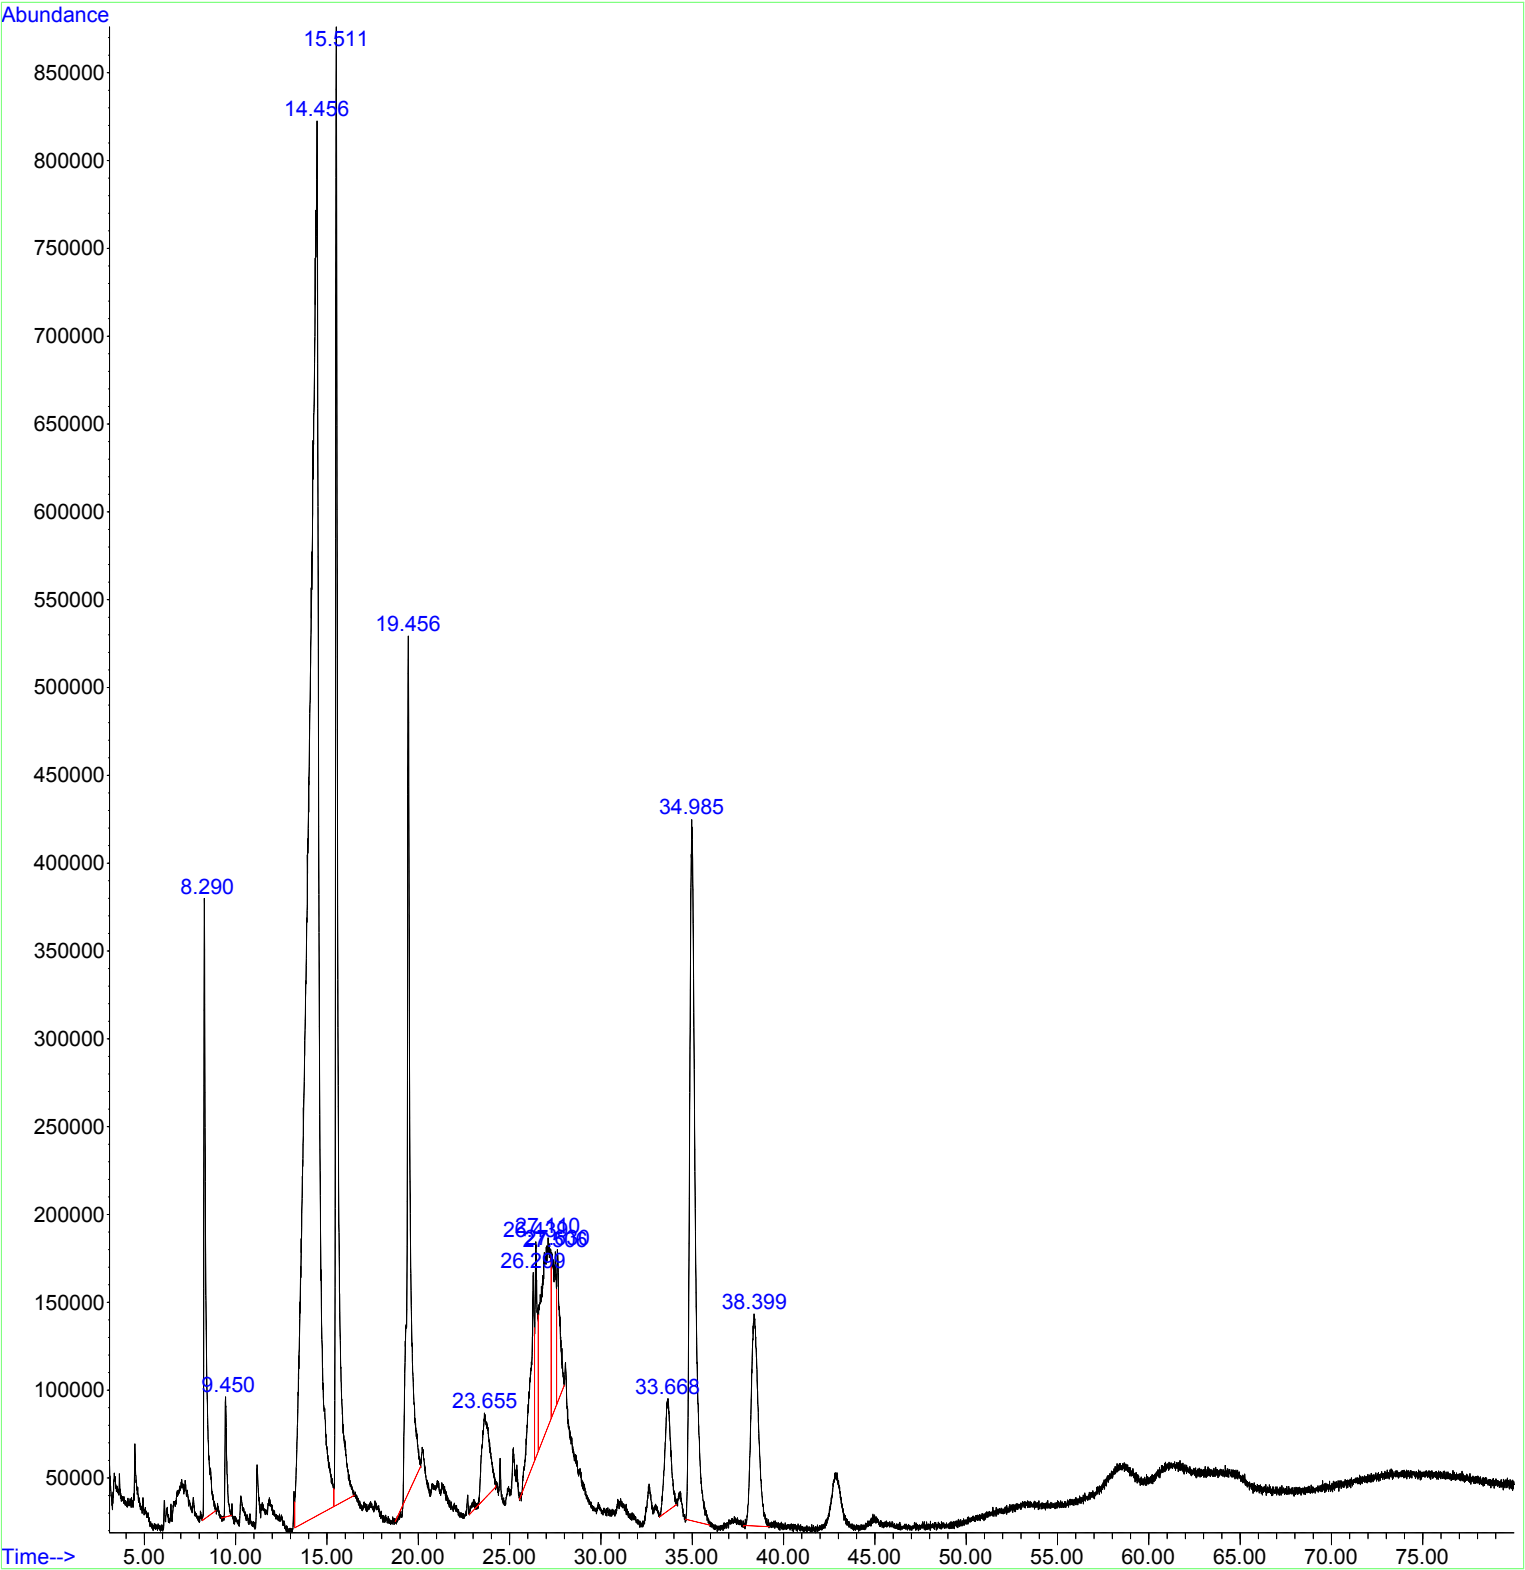

Acq On : 6 Mar 2019 17:30  
 Operator :  
 Sample : Apiary E 29 :  
 Misc  
 ALS Vial : 1 Sample Multiplier: 1

Integration Parameters: autoint1.e  
 Integrator: ChemStation

| peak<br># | R.T.<br>min | first<br>scan | max<br>scan | last<br>scan | PK<br>TY | peak<br>height | corr.<br>area | corr.<br>% max. | % of<br>total |
|-----------|-------------|---------------|-------------|--------------|----------|----------------|---------------|-----------------|---------------|
| 1         | 3.646       | 80            | 98          | 115          | BV 2     | 40337          | 1630100       | 0.24%           | 0.075%        |
| 2         | 4.194       | 115           | 193         | 238          | VV 3     | 131453         | 30417717      | 4.45%           | 1.403%        |
| 3         | 4.483       | 238           | 244         | 259          | VV 3     | 65711          | 3624922       | 0.53%           | 0.167%        |
| 4         | 4.644       | 259           | 272         | 333          | VV 9     | 45045          | 5726966       | 0.84%           | 0.264%        |
| 5         | 5.169       | 333           | 364         | 381          | PV 9     | 14504          | 786839        | 0.12%           | 0.036%        |
| 6         | 6.097       | 516           | 526         | 539          | PV 8     | 23801          | 754020        | 0.11%           | 0.035%        |
| 7         | 6.651       | 597           | 623         | 637          | VV 10    | 41397          | 3367617       | 0.49%           | 0.155%        |
| 8         | 6.791       | 637           | 647         | 687          | VV 10    | 27422          | 2064350       | 0.30%           | 0.095%        |
| 9         | 7.375       | 736           | 749         | 759          | VV 10    | 19612          | 1117311       | 0.16%           | 0.052%        |
| 10        | 7.693       | 759           | 805         | 817          | VV 5     | 46545          | 5694424       | 0.83%           | 0.263%        |
| 11        | 7.920       | 817           | 845         | 848          | VV 4     | 57483          | 5470839       | 0.80%           | 0.252%        |
| 12        | 7.955       | 848           | 851         | 856          | VV 4     | 59927          | 1623437       | 0.24%           | 0.075%        |
| 13        | 8.093       | 856           | 875         | 878          | VV 5     | 69067          | 4541289       | 0.66%           | 0.209%        |
| 14        | 8.121       | 878           | 880         | 894          | VV       | 67404          | 2311855       | 0.34%           | 0.107%        |
| 15        | 8.289       | 894           | 909         | 959          | VV 3     | 402433         | 31000652      | 4.54%           | 1.430%        |
| 16        | 8.587       | 959           | 961         | 993          | VV 3     | 48464          | 3834414       | 0.56%           | 0.177%        |
| 17        | 9.445       | 1092          | 1111        | 1141         | PV 4     | 67071          | 4357935       | 0.64%           | 0.201%        |
| 18        | 10.292      | 1234          | 1259        | 1276         | PV 4     | 18739          | 1085649       | 0.16%           | 0.050%        |
| 19        | 11.165      | 1366          | 1412        | 1515         | BV 7     | 51624          | 7407273       | 1.08%           | 0.342%        |
| 20        | 12.760      | 1659          | 1691        | 1703         | PV 6     | 13377          | 811420        | 0.12%           | 0.037%        |
| 21        | 13.125      | 1703          | 1754        | 1796         | VV 4     | 282326         | 41598956      | 6.09%           | 1.919%        |
| 22        | 14.227      | 1796          | 1947        | 1968         | VV 5     | 1104491        | 238440534     | 34.90%          | 10.998%       |
| 23        | 15.227      | 1968          | 2122        | 2138         | VV       | 1832773        | 683211048     | 100.00%         | 31.514%       |
| 24        | 15.465      | 2138          | 2163        | 2210         | PV       | 1899139        | 104340410     | 15.27%          | 4.813%        |
| 25        | 15.749      | 2210          | 2213        | 2237         | VV 4     | 58486          | 3374011       | 0.49%           | 0.156%        |
| 26        | 15.928      | 2237          | 2244        | 2258         | VV 4     | 23680          | 1334279       | 0.20%           | 0.062%        |
| 27        | 16.014      | 2258          | 2259        | 2267         | VV 8     | 12131          | 201254        | 0.03%           | 0.009%        |
| 28        | 16.417      | 2278          | 2330        | 2337         | PV 6     | 18941          | -619522       | -0.09%          | -0.029%       |
| 29        | 16.837      | 2337          | 2403        | 2405         | PV 6     | 7629           | -1052180      | -0.15%          | -0.049%       |
| 30        | 17.202      | 2405          | 2467        | 2492         | PV 4     | 415554         | 48417120      | 7.09%           | 2.233%        |
| 31        | 17.605      | 2492          | 2537        | 2595         | VV 4     | 429102         | 65156336      | 9.54%           | 3.005%        |
| 32        | 18.159      | 2595          | 2634        | 2643         | VV 10    | 50402          | 4810050       | 0.70%           | 0.222%        |
| 33        | 18.505      | 2643          | 2695        | 2698         | VV 9     | 34205          | 4221843       | 0.62%           | 0.195%        |
| 34        | 18.633      | 2698          | 2717        | 2735         | VV 5     | 110144         | 8477661       | 1.24%           | 0.391%        |
| 35        | 18.764      | 2735          | 2740        | 2756         | VB 5     | 31048          | 1277675       | 0.19%           | 0.059%        |
| 36        | 19.135      | 2774          | 2805        | 2837         | BV 7     | 192386         | 12696406      | 1.86%           | 0.586%        |
| 37        | 19.421      | 2837          | 2855        | 2958         | VV 2     | 955264         | 69459076      | 10.17%          | 3.204%        |
| 38        | 20.147      | 2958          | 2982        | 3040         | VV 3     | 81087          | 7942521       | 1.16%           | 0.366%        |
| 39        | 20.612      | 3040          | 3063        | 3087         | PV 7     | 75024          | 4223040       | 0.62%           | 0.195%        |
| 40        | 21.273      | 3164          | 3178        | 3192         | BV 7     | 27169          | 1347155       | 0.20%           | 0.062%        |
| 41        | 21.730      | 3218          | 3258        | 3287         | PV 2     | 83151          | 9905393       | 1.45%           | 0.457%        |

|    |        |      |      |      |    |    |        |           |        |        |
|----|--------|------|------|------|----|----|--------|-----------|--------|--------|
| 42 | 21.981 | 3287 | 3302 | 3308 | VV | 8  | 34587  | 2232513   | 0.33%  | 0.103% |
| 43 | 22.055 | 3308 | 3315 | 3347 | VV | 8  | 38232  | 2588205   | 0.38%  | 0.119% |
| 44 | 23.019 | 3452 | 3483 | 3507 | PV | 3  | 730858 | 53176885  | 7.78%  | 2.453% |
| 45 | 23.169 | 3507 | 3510 | 3541 | VV | 2  | 192466 | 12640355  | 1.85%  | 0.583% |
| 46 | 23.411 | 3541 | 3552 | 3577 | VV | 2  | 51623  | 3281481   | 0.48%  | 0.151% |
| 47 | 24.926 | 3653 | 3817 | 3836 | PV | 2  | 885648 | 113647824 | 16.63% | 5.242% |
| 48 | 25.100 | 3836 | 3847 | 3861 | VV | 8  | 572054 | 43907514  | 6.43%  | 2.025% |
| 49 | 25.190 | 3861 | 3863 | 3866 | VV | 4  | 474054 | 8599397   | 1.26%  | 0.397% |
| 50 | 25.602 | 3866 | 3935 | 3957 | VV | 6  | 719787 | 154654910 | 22.64% | 7.134% |
| 51 | 26.461 | 4071 | 4085 | 4105 | PV | 7  | 27611  | 1096541   | 0.16%  | 0.051% |
| 52 | 27.553 | 4236 | 4276 | 4288 | PV | 10 | 43658  | 2444468   | 0.36%  | 0.113% |
| 53 | 27.660 | 4288 | 4295 | 4323 | VV | 10 | 22968  | 1434267   | 0.21%  | 0.066% |
| 54 | 28.091 | 4323 | 4370 | 4395 | VV | 10 | 19342  | 2008050   | 0.29%  | 0.093% |
| 55 | 28.338 | 4395 | 4413 | 4415 | VV | 10 | 23791  | 1015004   | 0.15%  | 0.047% |
| 56 | 28.533 | 4415 | 4447 | 4484 | VV | 3  | 126730 | 13434021  | 1.97%  | 0.620% |
| 57 | 28.808 | 4484 | 4495 | 4517 | VV | 3  | 36936  | 1986049   | 0.29%  | 0.092% |
| 58 | 29.433 | 4573 | 4604 | 4613 | BV | 3  | 40757  | 2497579   | 0.37%  | 0.115% |
| 59 | 29.590 | 4613 | 4632 | 4644 | VV | 3  | 78848  | 6127528   | 0.90%  | 0.283% |
| 60 | 29.762 | 4644 | 4662 | 4717 | VV | 3  | 130372 | 16578367  | 2.43%  | 0.765% |
| 61 | 30.264 | 4723 | 4750 | 4770 | PV | 3  | 17818  | 1395002   | 0.20%  | 0.064% |
| 62 | 30.773 | 4795 | 4839 | 4863 | BV | 3  | 25315  | 1728831   | 0.25%  | 0.080% |
| 63 | 31.431 | 4898 | 4954 | 5041 | BV | 7  | 384018 | 42840231  | 6.27%  | 1.976% |
| 64 | 32.303 | 5088 | 5106 | 5114 | VV | 7  | 27573  | 1618355   | 0.24%  | 0.075% |
| 65 | 32.402 | 5114 | 5123 | 5162 | VB | 7  | 24260  | 1564760   | 0.23%  | 0.072% |
| 66 | 32.829 | 5164 | 5198 | 5223 | BV | 7  | 27805  | 2898150   | 0.42%  | 0.134% |
| 67 | 33.099 | 5223 | 5245 | 5255 | VV | 9  | 44026  | 2353073   | 0.34%  | 0.109% |
| 68 | 33.236 | 5255 | 5269 | 5277 | VV | 8  | 43427  | 2441366   | 0.36%  | 0.113% |
| 69 | 33.364 | 5277 | 5291 | 5322 | VV | 7  | 90915  | 5943351   | 0.87%  | 0.274% |
| 70 | 34.089 | 5322 | 5418 | 5452 | PV | 8  | 100724 | 19913916  | 2.91%  | 0.919% |
| 71 | 34.300 | 5452 | 5455 | 5461 | VV | 8  | 24219  | 672917    | 0.10%  | 0.031% |
| 72 | 34.346 | 5461 | 5463 | 5481 | VV | 8  | 22575  | 834865    | 0.12%  | 0.039% |
| 73 | 34.600 | 5481 | 5507 | 5540 | PV | 5  | 299966 | 21007256  | 3.07%  | 0.969% |
| 74 | 35.404 | 5595 | 5648 | 5689 | BV |    | 646800 | 68625388  | 10.04% | 3.165% |
| 75 | 37.015 | 5817 | 5929 | 5945 | BV |    | 55107  | 10146389  | 1.49%  | 0.468% |
| 76 | 37.117 | 5945 | 5947 | 5962 | VV |    | 47278  | 2588882   | 0.38%  | 0.119% |
| 77 | 37.280 | 5962 | 5976 | 5978 | VV |    | 48232  | 2378977   | 0.35%  | 0.110% |
| 78 | 37.486 | 5978 | 6012 | 6021 | VV |    | 61063  | 8063385   | 1.18%  | 0.372% |
| 79 | 37.762 | 6021 | 6060 | 6272 | VV | 3  | 439125 | 78670087  | 11.51% | 3.629% |
| 80 | 39.671 | 6296 | 6394 | 6398 | BV | 3  | 8593   | 861214    | 0.13%  | 0.040% |
| 81 | 39.714 | 6398 | 6401 | 6418 | VB | 3  | 7523   | 239587    | 0.04%  | 0.011% |
| 82 | 40.434 | 6452 | 6527 | 6599 | PV | 2  | 79139  | 15236890  | 2.23%  | 0.703% |
| 83 | 42.028 | 6765 | 6805 | 6809 | BV | 2  | 39574  | 2787804   | 0.41%  | 0.129% |
| 84 | 42.064 | 6809 | 6812 | 6880 | VB | 3  | 40815  | 3393139   | 0.50%  | 0.157% |

Sum of corrected areas: 2167946866

File  
Operator :  
Acquired : 7 Mar 2019 21:50 using AcqMethod FOMETHOD.M  
Instrument : 5975 MSD  
Sample Name: Apiary D 4  
Misc Info :  
Vial Number: 20

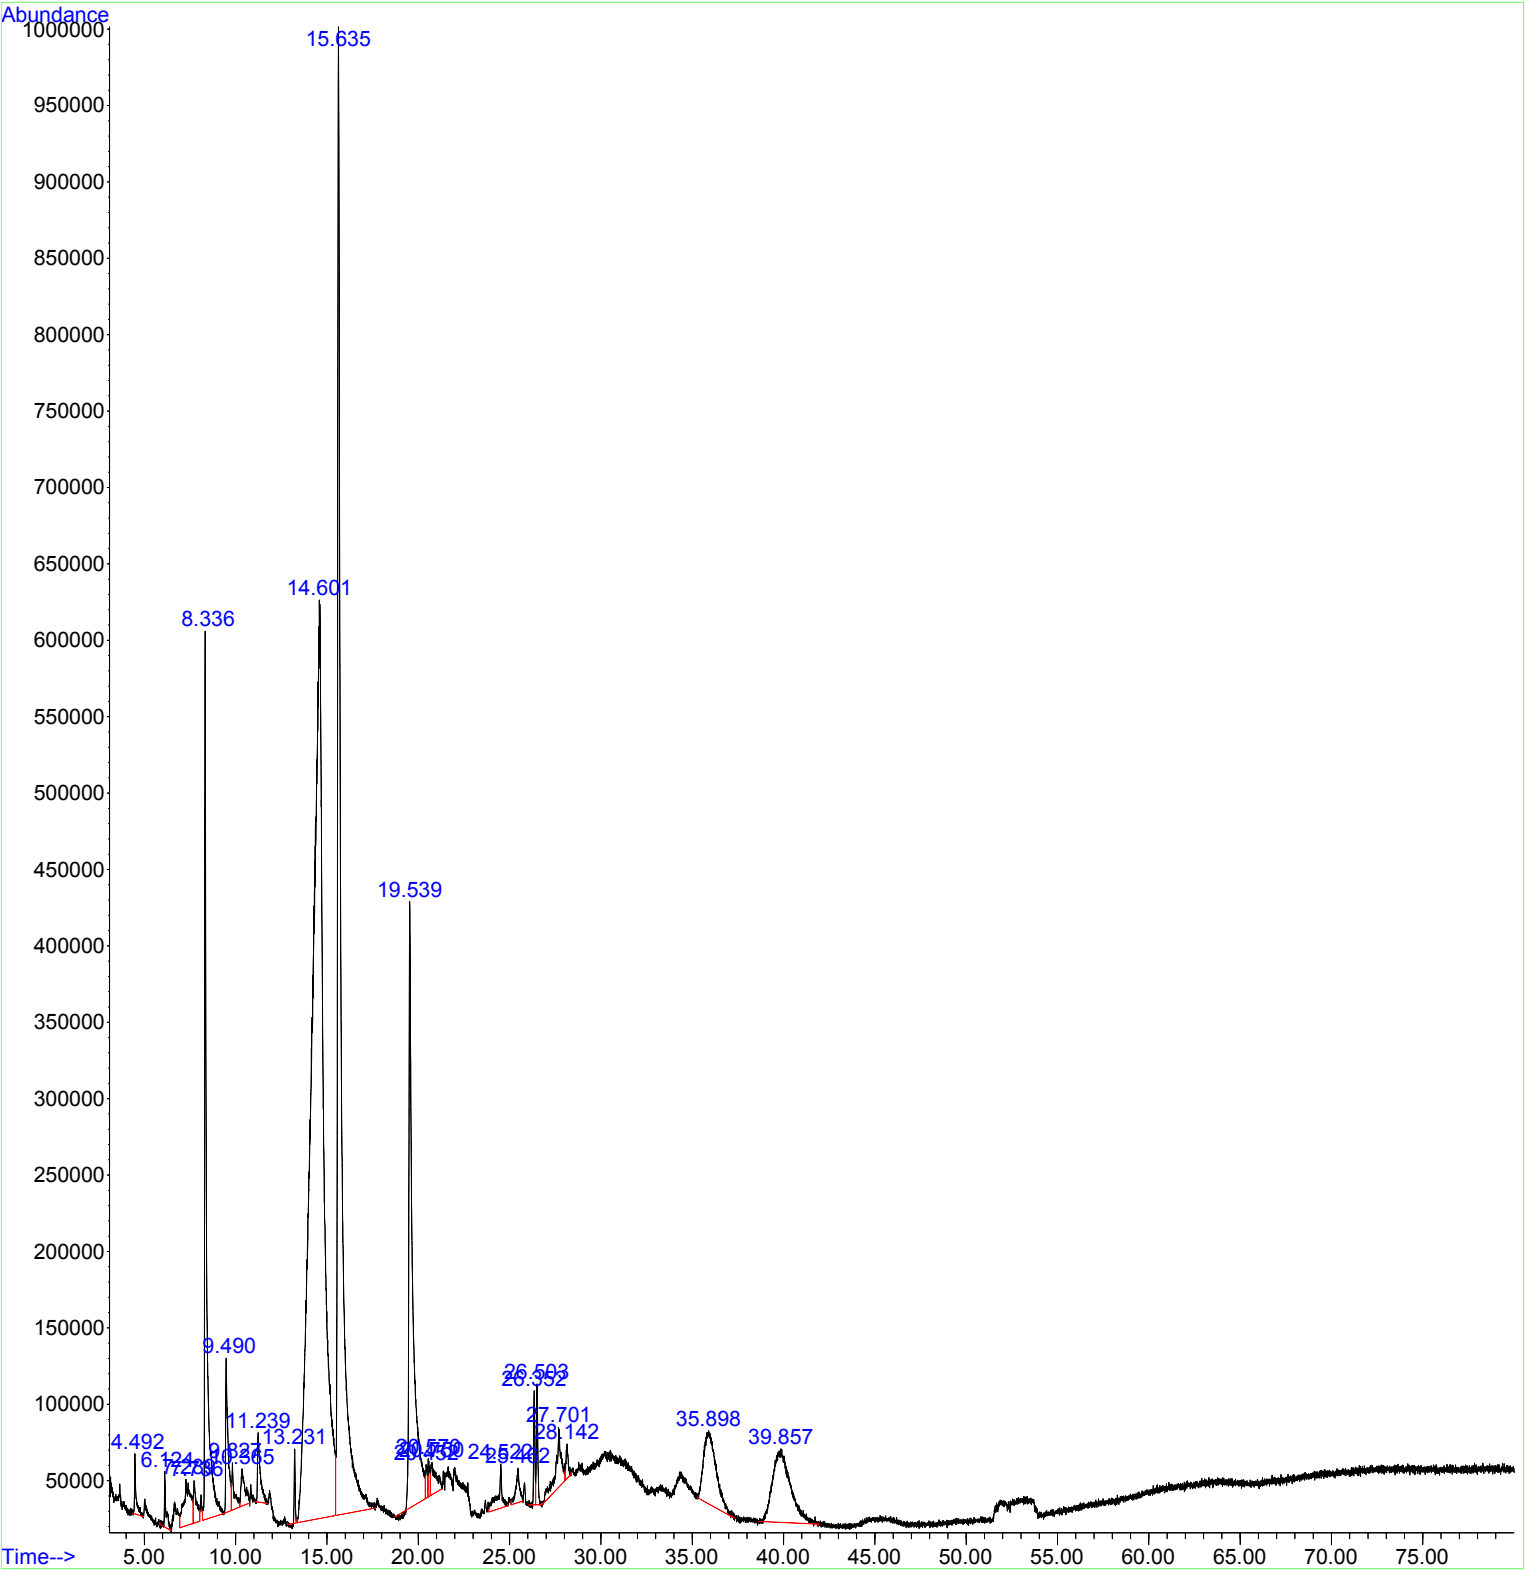

Acq On : 7 Mar 2019 21:50  
 Operator :  
 Sample : Apiary D 4  
 Misc :  
 ALS Vial : 20 Sample Multiplier: 1

Integration Parameters: autoint1.e  
 Integrator: ChemStation

| peak<br># | R.T.<br>min | first<br>scan | max<br>scan | last<br>scan | PK<br>TY | peak<br>height | corr.<br>area | corr.<br>% max. | % of<br>total |
|-----------|-------------|---------------|-------------|--------------|----------|----------------|---------------|-----------------|---------------|
| ---       | ----        | -----         | -----       | -----        | ---      | -----          | -----         | -----           | -----         |
| 1         | 4.492       | 226           | 246         | 325          | PV 4     | 35579          | 2274432       | 0.85%           | 0.364%        |
| 2         | 6.124       | 482           | 531         | 590          | BV 4     | 30919          | 2285282       | 0.85%           | 0.366%        |
| 3         | 7.289       | 674           | 734         | 802          | VV 4     | 27934          | 7718274       | 2.88%           | 1.235%        |
| 4         | 7.736       | 802           | 813         | 865          | VV 3     | 27412          | 3174285       | 1.18%           | 0.508%        |
| 5         | 8.336       | 891           | 917         | 1092         | VV 2     | 535064         | 42529464      | 15.85%          | 6.804%        |
| 6         | 9.490       | 1092          | 1119        | 1167         | PV 2     | 95179          | 9106172       | 3.39%           | 1.457%        |
| 7         | 9.827       | 1167          | 1178        | 1248         | VV 2     | 28517          | 2875543       | 1.07%           | 0.460%        |
| 8         | 10.365      | 1248          | 1272        | 1342         | VV 9     | 21597          | 3506085       | 1.31%           | 0.561%        |
| 9         | 11.239      | 1392          | 1425        | 1515         | BV 2     | 44226          | 4736640       | 1.76%           | 0.758%        |
| 10        | 13.231      | 1705          | 1773        | 1795         | BV 3     | 45566          | 1620928       | 0.60%           | 0.259%        |
| 11        | 14.601      | 1795          | 2012        | 2164         | VV 2     | 581951         | 268374605     | 100.00%         | 42.934%       |
| 12        | 15.635      | 2164          | 2193        | 2545         | VV 2     | 968584         | 133269783     | 49.66%          | 21.320%       |
| 13        | 19.539      | 2731          | 2875        | 3023         | BV 2     | 391795         | 56068749      | 20.89%          | 8.970%        |
| 14        | 20.452      | 3023          | 3035        | 3048         | VV 2     | 19861          | 1504594       | 0.56%           | 0.241%        |
| 15        | 20.570      | 3048          | 3055        | 3071         | VV 2     | 21107          | 1490099       | 0.56%           | 0.238%        |
| 16        | 20.750      | 3071          | 3087        | 3181         | VV 2     | 20218          | 4138478       | 1.54%           | 0.662%        |
| 17        | 24.522      | 3630          | 3746        | 3814         | VV 2     | 27383          | 4333258       | 1.61%           | 0.693%        |
| 18        | 25.462      | 3843          | 3910        | 3957         | VV 2     | 21981          | 3078058       | 1.15%           | 0.492%        |
| 19        | 26.352      | 4014          | 4066        | 4079         | BV 6     | 73509          | 3509225       | 1.31%           | 0.561%        |
| 20        | 26.503      | 4079          | 4092        | 4141         | VV 5     | 79074          | 4514093       | 1.68%           | 0.722%        |
| 21        | 27.701      | 4141          | 4302        | 4361         | PV 5     | 37185          | 8159124       | 3.04%           | 1.305%        |
| 22        | 28.142      | 4361          | 4379        | 4419         | VV 5     | 21394          | 1859451       | 0.69%           | 0.297%        |
| 23        | 35.898      | 5630          | 5734        | 5984         | BV 5     | 46087          | 22717897      | 8.46%           | 3.634%        |
| 24        | 39.857      | 6213          | 6426        | 6783         | BB 5     | 46520          | 32240515      | 12.01%          | 5.158%        |

Sum of corrected areas: 625085035

Acq On : 7 Mar 2019 23:20  
Operator :  
Sample : Apiary D 7  
Misc :  
ALS Vial : 21 Sample Multiplier: 1

Integration Parameters: autoint1.e  
Integrator: ChemStation

| peak<br># | R.T.<br>min | first<br>scan | max<br>scan | last<br>scan | PK<br>TY | peak<br>height | corr.<br>area | corr.<br>% max. | % of<br>total |
|-----------|-------------|---------------|-------------|--------------|----------|----------------|---------------|-----------------|---------------|
| ---       | ---         | ---           | ---         | ---          | ---      | ---            | ---           | ---             | ---           |
| 1         | 3.654       | 86            | 99          | 122          | PV       | 26313          | 640649        | 0.12%           | 0.057%        |
| 2         | 4.495       | 227           | 246         | 329          | VV 7     | 22433          | 2102928       | 0.38%           | 0.187%        |
| 3         | 6.122       | 505           | 531         | 545          | BV 3     | 20422          | 1035510       | 0.19%           | 0.092%        |
| 4         | 8.343       | 889           | 919         | 1069         | VV 2     | 376265         | 32855785      | 5.93%           | 2.923%        |
| 5         | 9.489       | 1069          | 1119        | 1172         | VV 2     | 119917         | 11516156      | 2.08%           | 1.025%        |
| 6         | 10.333      | 1242          | 1266        | 1342         | VV 2     | 40754          | 6308344       | 1.14%           | 0.561%        |
| 7         | 11.243      | 1388          | 1425        | 1515         | BV 2     | 27047          | 2644071       | 0.48%           | 0.235%        |
| 8         | 13.237      | 1708          | 1774        | 1798         | BV 3     | 24250          | 856861        | 0.15%           | 0.076%        |
| 9         | 15.147      | 1798          | 2108        | 2172         | PV 3     | 1049269        | 554299673     | 100.00%         | 49.315%       |
| 10        | 15.652      | 2172          | 2196        | 2424         | VV       | 1568065        | 220360424     | 39.75%          | 19.605%       |
| 11        | 17.092      | 2424          | 2448        | 2555         | VV 7     | 24842          | 5802455       | 1.05%           | 0.516%        |
| 12        | 19.552      | 2801          | 2878        | 3008         | BV       | 737239         | 95419853      | 17.21%          | 8.489%        |
| 13        | 20.368      | 3008          | 3020        | 3181         | VV       | 40038          | 11929011      | 2.15%           | 1.061%        |
| 14        | 21.395      | 3181          | 3200        | 3284         | VB       | 19134          | 2153666       | 0.39%           | 0.192%        |
| 15        | 24.526      | 3511          | 3747        | 3868         | BV 9     | 46905          | 19008070      | 3.43%           | 1.691%        |
| 16        | 25.456      | 3868          | 3909        | 4048         | VV 9     | 51616          | 13493354      | 2.43%           | 1.200%        |
| 17        | 26.512      | 4048          | 4094        | 4144         | VV 8     | 69807          | 6594339       | 1.19%           | 0.587%        |
| 18        | 27.612      | 4144          | 4286        | 4354         | PV 8     | 35115          | 8205699       | 1.48%           | 0.730%        |
| 19        | 28.151      | 4354          | 4380        | 4461         | VB 8     | 19312          | 2565124       | 0.46%           | 0.228%        |
| 20        | 31.072      | 4464          | 4891        | 5227         | BV 10    | 29458          | 40266153      | 7.26%           | 3.582%        |
| 21        | 39.925      | 6190          | 6438        | 6577         | BV 3     | 102550         | 65498333      | 11.82%          | 5.827%        |
| 22        | 40.799      | 6577          | 6591        | 6887         | VB 5     | 45507          | 20452837      | 3.69%           | 1.820%        |

Sum of corrected areas: 1124009294



File  
Operator :  
Acquired : 7 Mar 2019 23:20 using AcqMethod FOMETHOD.M  
Instrument : 5975 MSD  
Sample Name: Apiary D 7  
Misc Info :  
Vial Number: 21

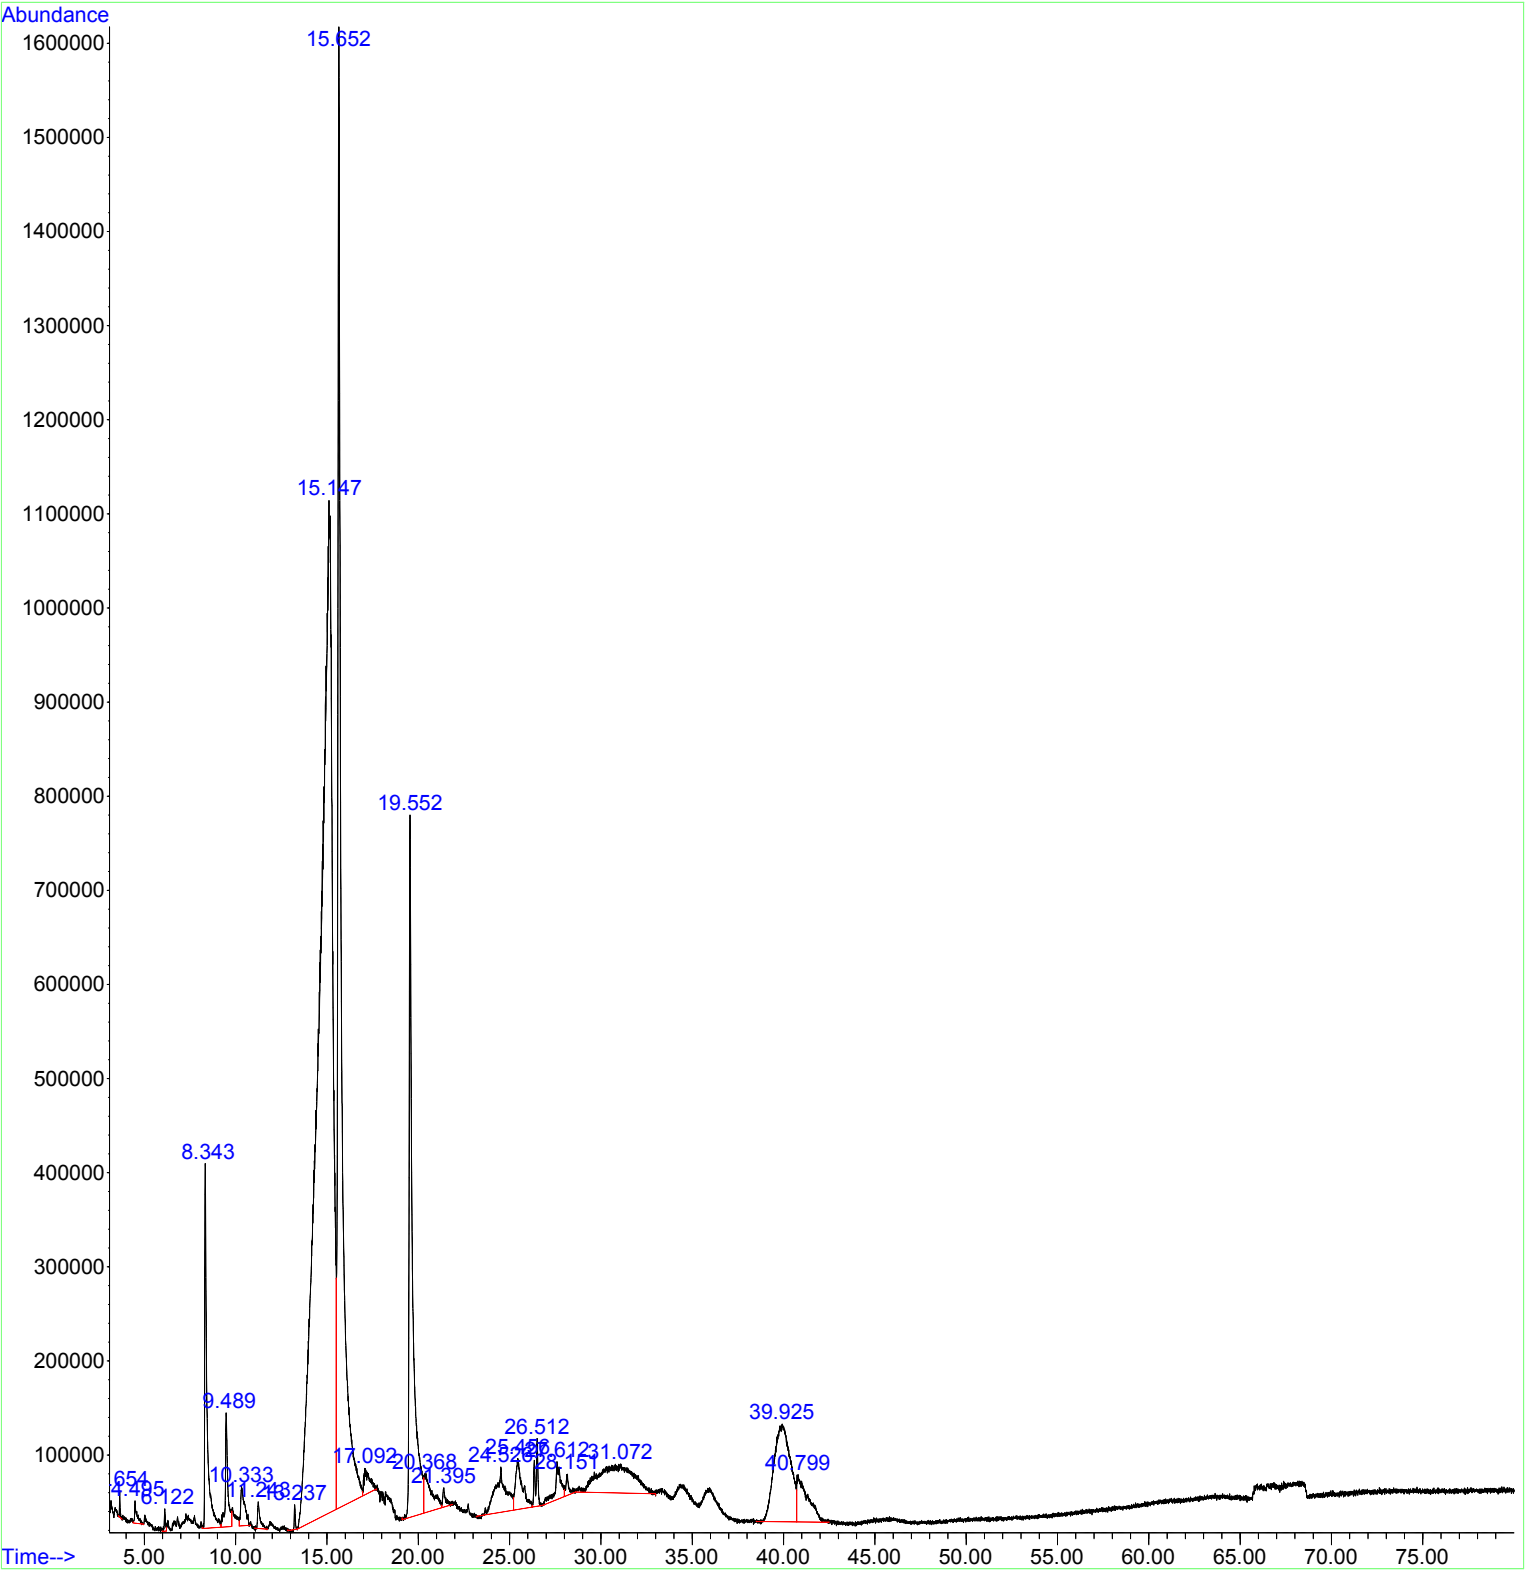

Acq On : 8 Mar 2019 00:49  
 Operator :  
 Sample : Apiary D 14 :  
 Misc : 22  
 ALS Vial Sample Multiplier: 1

Integration Parameters: autoint1.e  
 Integrator: ChemStation

| peak<br># | R.T.<br>min | first<br>scan | max<br>scan | last<br>scan | PK<br>TY | peak<br>height | corr.<br>area | corr.<br>% max. | % of<br>total |
|-----------|-------------|---------------|-------------|--------------|----------|----------------|---------------|-----------------|---------------|
| ---       | ----        | -----         | -----       | -----        | ---      | -----          | -----         | -----           | -----         |
| 1         | 8.342       | 892           | 918         | 1038         | PV 2     | 287847         | 23440200      | 2.48%           | 1.388%        |
| 2         | 9.485       | 1038          | 1118        | 1173         | VV 2     | 100813         | 6391577       | 0.68%           | 0.378%        |
| 3         | 10.332      | 1221          | 1266        | 1316         | BV 2     | 35764          | 3080175       | 0.33%           | 0.182%        |
| 4         | 14.588      | 1802          | 2010        | 2022         | VV 2     | 687964         | 237940104     | 25.20%          | 14.086%       |
| 5         | 14.788      | 2022          | 2045        | 2051         | VV 3     | 761944         | 69165396      | 7.32%           | 4.094%        |
| 6         | 15.661      | 2051          | 2198        | 2532         | VV 6     | 2681902        | 944317142     | 100.00%         | 55.902%       |
| 7         | 19.567      | 2817          | 2880        | 3003         | BV 2     | 1099488        | 141448956     | 14.98%          | 8.374%        |
| 8         | 20.382      | 3003          | 3023        | 3105         | VB 6     | 55062          | 11620285      | 1.23%           | 0.688%        |
| 9         | 23.681      | 3552          | 3599        | 3617         | BV 10    | 32386          | 2282867       | 0.24%           | 0.135%        |
| 10        | 24.272      | 3617          | 3702        | 3710         | VV 5     | 53009          | 7285977       | 0.77%           | 0.431%        |
| 11        | 24.529      | 3710          | 3747        | 3771         | VV 4     | 170532         | 15963493      | 1.69%           | 0.945%        |
| 12        | 24.695      | 3771          | 3776        | 3813         | VV 4     | 51058          | 6406933       | 0.68%           | 0.379%        |
| 13        | 25.465      | 3813          | 3911        | 3960         | VV 8     | 194893         | 39382735      | 4.17%           | 2.331%        |
| 14        | 25.828      | 3960          | 3974        | 4052         | VV 8     | 106769         | 12556936      | 1.33%           | 0.743%        |
| 15        | 26.365      | 4052          | 4068        | 4082         | VV 2     | 247602         | 12240429      | 1.30%           | 0.725%        |
| 16        | 26.516      | 4082          | 4095        | 4147         | VB 2     | 261880         | 15656575      | 1.66%           | 0.927%        |
| 17        | 27.603      | 4210          | 4285        | 4296         | BV 5     | 103911         | 4437375       | 0.47%           | 0.263%        |
| 18        | 27.700      | 4296          | 4302        | 4318         | VV 7     | 59539          | 2696216       | 0.29%           | 0.160%        |
| 19        | 29.876      | 4547          | 4682        | 4688         | PV 7     | 31301          | 11613172      | 1.23%           | 0.687%        |
| 20        | 31.440      | 4688          | 4955        | 5130         | VB 8     | 46607          | 51214922      | 5.42%           | 3.032%        |
| 21        | 39.987      | 6270          | 6449        | 6860         | BB 6     | 94040          | 70102773      | 7.42%           | 4.150%        |

Sum of corrected areas: 1689244239

File  
Operator :  
Acquired : 8 Mar 2019 00:49 using AcqMethod FOMETHOD.M  
Instrument : 5975 MSD  
Sample Name: Apiary D 14  
Misc Info :  
Vial Number: 22

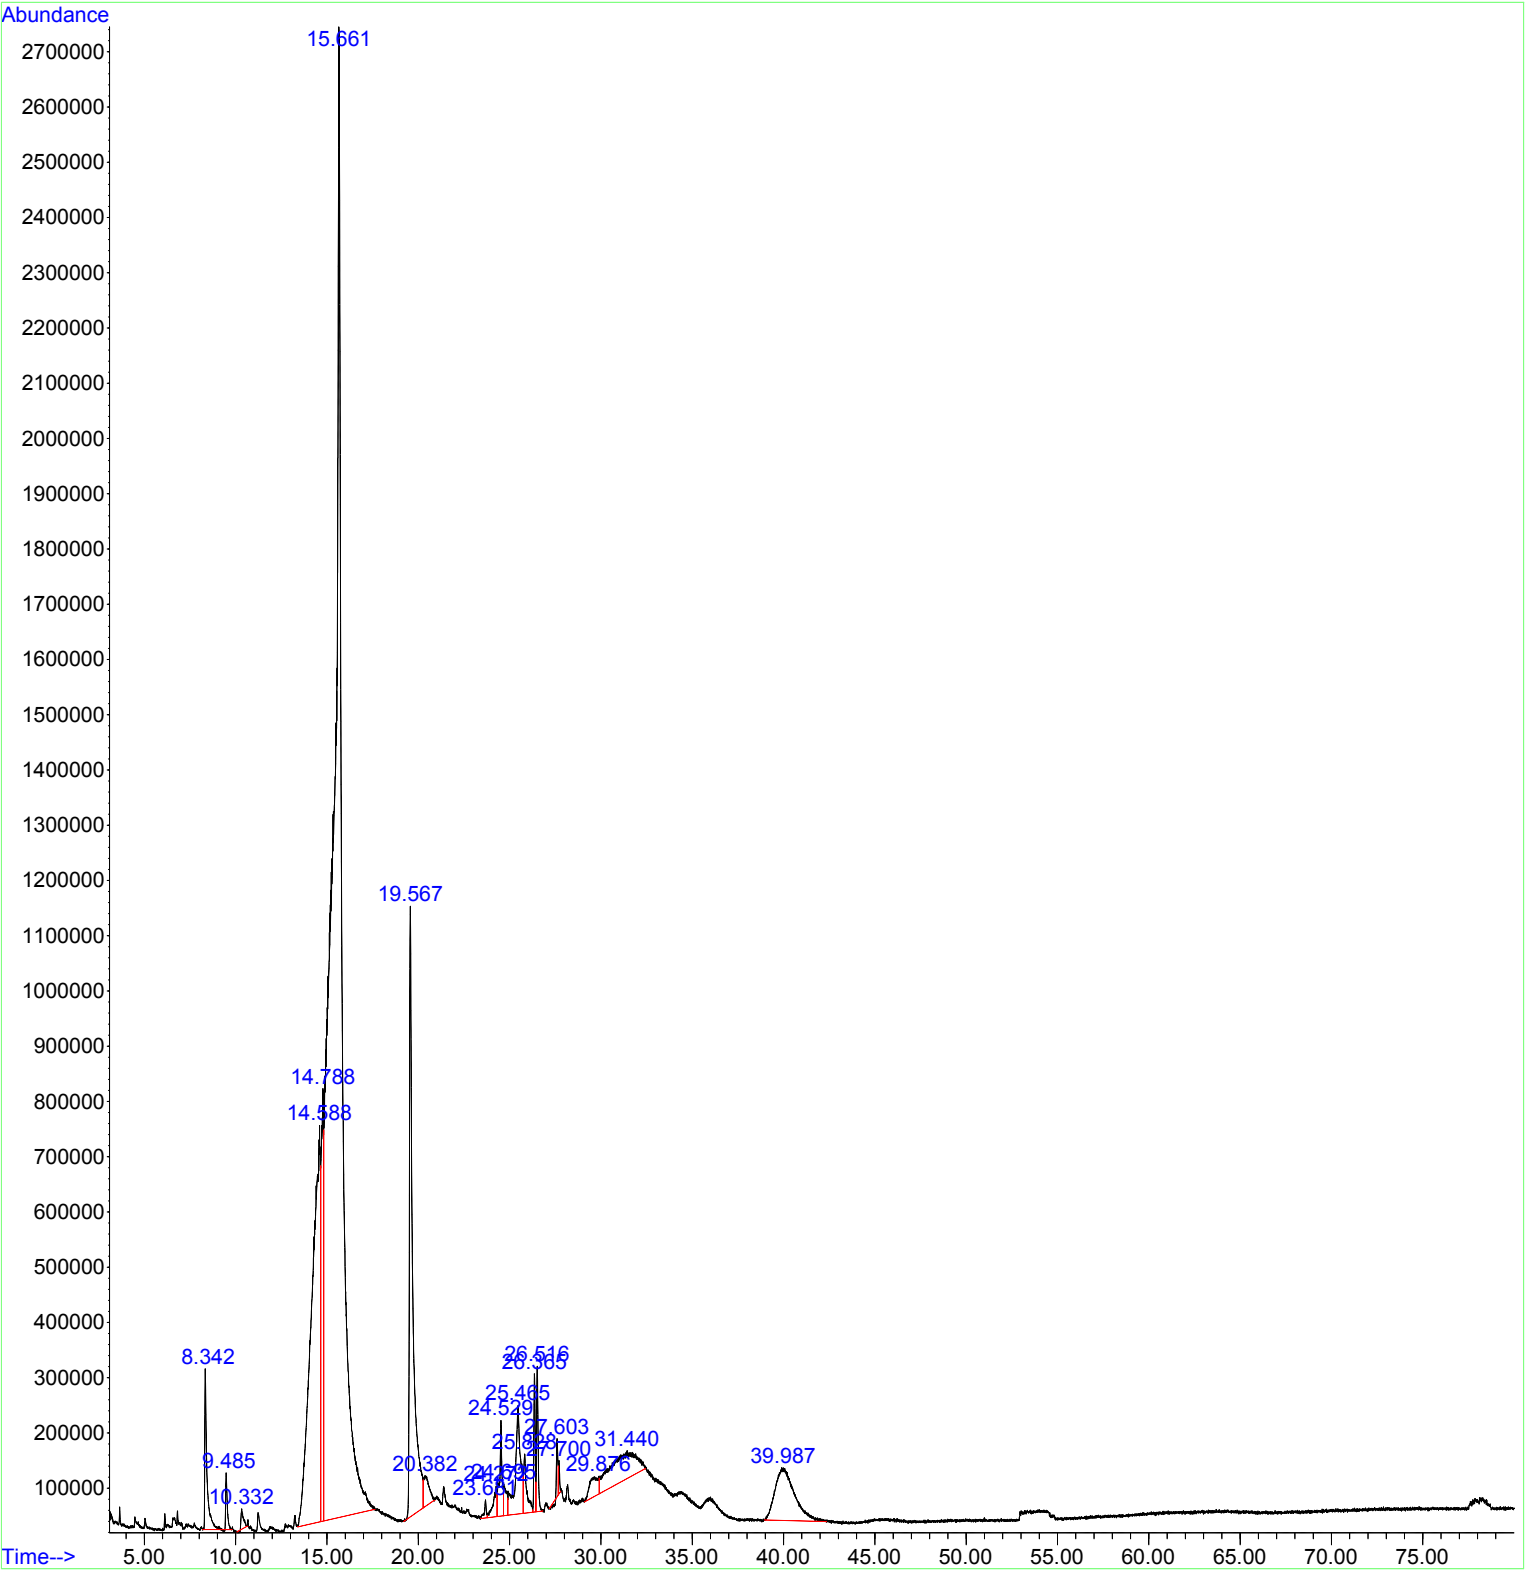

Acq On : 8 Mar 2019 2:19  
Operator :  
Sample : Apiary D 17 :  
Misc : 23  
ALS Vial Sample Multiplier: 1

Integration Parameters: autoint1.e  
Integrator: ChemStation

| peak<br># | R.T.<br>min | first<br>scan | max<br>scan | last<br>scan | PK<br>TY | peak<br>height | corr.<br>area | corr.<br>% max. | % of<br>total |
|-----------|-------------|---------------|-------------|--------------|----------|----------------|---------------|-----------------|---------------|
| ---       | ----        | -----         | -----       | -----        | ---      | -----          | -----         | -----           | -----         |
| 1         | 4.488       | 206           | 245         | 281          | BB 3     | 25965          | 1298783       | 0.37%           | 0.176%        |
| 2         | 7.285       | 670           | 734         | 749          | PV 3     | 10688          | 781646        | 0.22%           | 0.106%        |
| 3         | 8.347       | 891           | 919         | 1041         | PV       | 629743         | 49180967      | 13.92%          | 6.668%        |
| 4         | 9.496       | 1076          | 1120        | 1173         | BV 4     | 80273          | 5646072       | 1.60%           | 0.766%        |
| 5         | 11.247      | 1389          | 1426        | 1519         | BB 3     | 31463          | 3291983       | 0.93%           | 0.446%        |
| 6         | 13.242      | 1739          | 1775        | 1799         | BV 3     | 33575          | 1397323       | 0.40%           | 0.189%        |
| 7         | 14.596      | 1799          | 2011        | 2172         | PV 3     | 784653         | 353385333     | 100.00%         | 47.914%       |
| 8         | 15.657      | 2172          | 2197        | 2439         | VV 2     | 1465486        | 190148523     | 53.81%          | 25.782%       |
| 9         | 19.553      | 2780          | 2878        | 3010         | BV 2     | 604916         | 86093423      | 24.36%          | 11.673%       |
| 10        | 20.414      | 3010          | 3028        | 3119         | VV 2     | 32449          | 6385670       | 1.81%           | 0.866%        |
| 11        | 24.533      | 3733          | 3748        | 3797         | VB 2     | 21405          | 1925310       | 0.54%           | 0.261%        |
| 12        | 26.362      | 4035          | 4068        | 4082         | BV 7     | 37332          | 1855637       | 0.53%           | 0.252%        |
| 13        | 26.512      | 4082          | 4094        | 4132         | VB 6     | 39341          | 2375293       | 0.67%           | 0.322%        |
| 14        | 36.038      | 5634          | 5759        | 5924         | BB 6     | 34725          | 16028544      | 4.54%           | 2.173%        |
| 15        | 39.924      | 6288          | 6438        | 6624         | BB 5     | 29548          | 17739726      | 5.02%           | 2.405%        |

Sum of corrected areas: 737534233

File  
Operator :  
Acquired : 8 Mar 2019 2:19 using AcqMethod FOMETHOD.M  
Instrument : 5975 MSD  
Sample Name: Apiary D 17  
Misc Info :  
Vial Number: 23

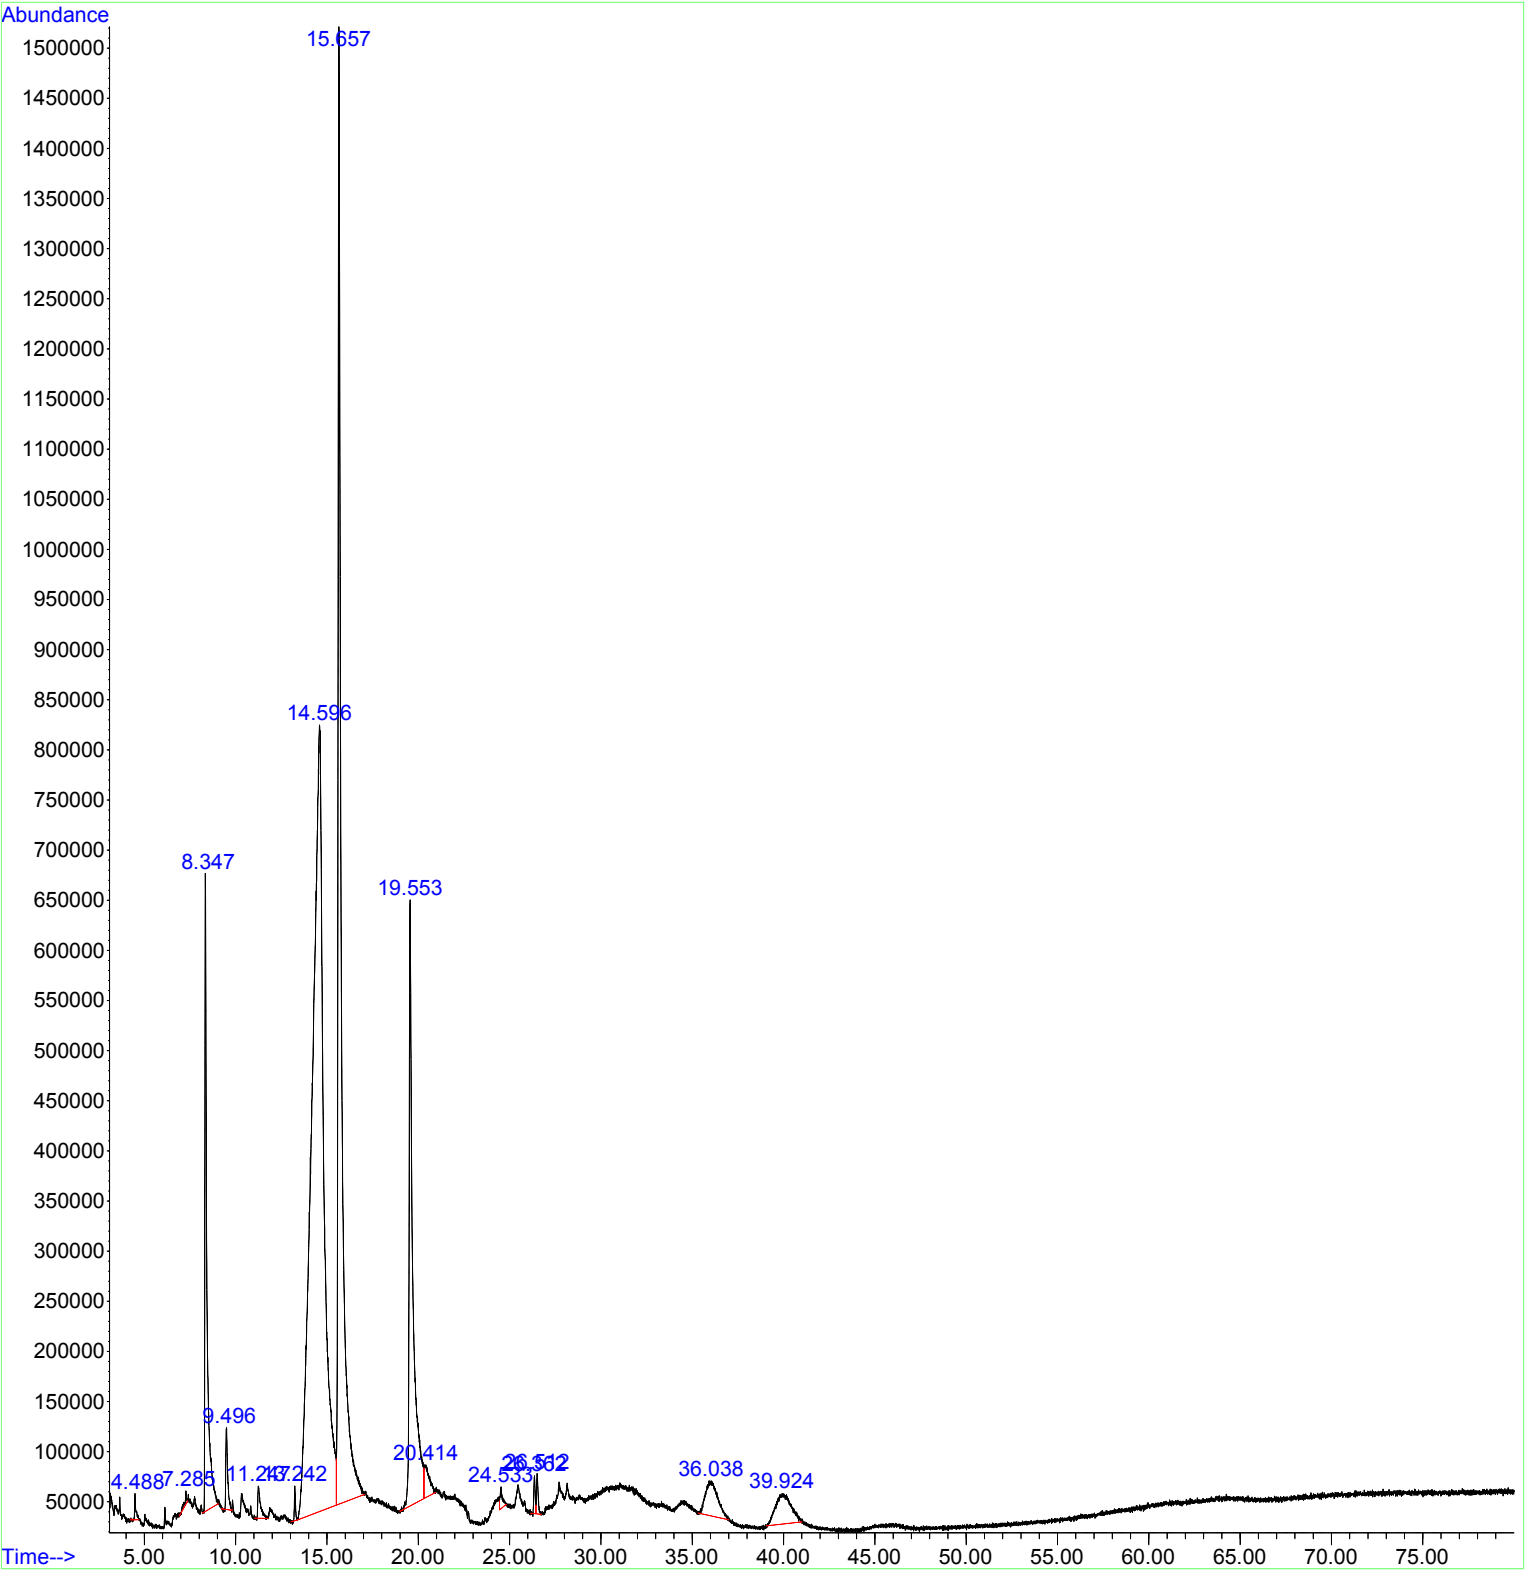

Acq On : 8 Mar 2019 3:48  
 Operator :  
 Sample : Apiary D  
 Misc 23 :  
 ALS Vial : 24 Sample Multiplier: 1

Integration Parameters: autoint1.e  
 Integrator: ChemStation

| peak<br># | R.T.<br>min | first<br>scan | max<br>scan | last<br>scan | PK<br>TY | peak<br>height | corr.<br>area | corr.<br>% max. | % of<br>total |
|-----------|-------------|---------------|-------------|--------------|----------|----------------|---------------|-----------------|---------------|
| ---       | ----        | -----         | -----       | -----        | ---      | -----          | -----         | -----           | -----         |
| 1         | 4.483       | 226           | 244         | 254          | BV 3     | 33808          | 969894        | 0.29%           | 0.127%        |
| 2         | 6.126       | 473           | 531         | 545          | BV 3     | 25748          | 285023        | 0.09%           | 0.037%        |
| 3         | 7.291       | 716           | 735         | 749          | VV 4     | 42667          | 3070401       | 0.93%           | 0.403%        |
| 4         | 7.411       | 749           | 756         | 764          | VV 5     | 39232          | 1629710       | 0.50%           | 0.214%        |
| 5         | 7.521       | 764           | 775         | 795          | VV 7     | 44811          | 3808104       | 1.16%           | 0.500%        |
| 6         | 7.762       | 795           | 817         | 854          | VV       | 49412          | 5848446       | 1.78%           | 0.767%        |
| 7         | 8.348       | 887           | 919         | 1041         | VV       | 864426         | 67164794      | 20.43%          | 8.812%        |
| 8         | 9.496       | 1093          | 1120        | 1169         | BV       | 74764          | 5771518       | 1.76%           | 0.757%        |
| 9         | 11.252      | 1393          | 1427        | 1519         | BV 3     | 40325          | 4213300       | 1.28%           | 0.553%        |
| 10        | 13.243      | 1737          | 1775        | 1794         | BV 2     | 44568          | 1812061       | 0.55%           | 0.238%        |
| 11        | 14.676      | 1794          | 2025        | 2172         | VV 3     | 886881         | 328781737     | 100.00%         | 43.136%       |
| 12        | 15.663      | 2172          | 2198        | 2446         | VV       | 1492442        | 197346619     | 60.02%          | 25.892%       |
| 13        | 19.558      | 2775          | 2879        | 3119         | BV 2     | 467706         | 77257792      | 23.50%          | 10.136%       |
| 14        | 24.536      | 3613          | 3749        | 3803         | PB 2     | 22245          | 4854089       | 1.48%           | 0.637%        |
| 15        | 26.368      | 4052          | 4069        | 4082         | PV 10    | 38404          | 1969842       | 0.60%           | 0.258%        |
| 16        | 26.520      | 4082          | 4095        | 4135         | VV 7     | 40121          | 2747649       | 0.84%           | 0.360%        |
| 17        | 27.721      | 4135          | 4305        | 4353         | PV 7     | 30589          | 7348809       | 2.24%           | 0.964%        |
| 18        | 28.160      | 4353          | 4382        | 4427         | VV 7     | 21368          | 2721929       | 0.83%           | 0.357%        |
| 19        | 36.105      | 5623          | 5770        | 6003         | BV 7     | 56859          | 28219558      | 8.58%           | 3.702%        |
| 20        | 40.010      | 6231          | 6453        | 6582         | BB 5     | 31500          | 16377372      | 4.98%           | 2.149%        |

Sum of corrected areas: 762198646

File  
Operator :  
Acquired : 8 Mar 2019 3:48 using AcqMethod FOMETHOD.M  
Instrument : 5975 MSD  
Sample Name: Apiary D 23  
Misc Info :  
Vial Number: 24

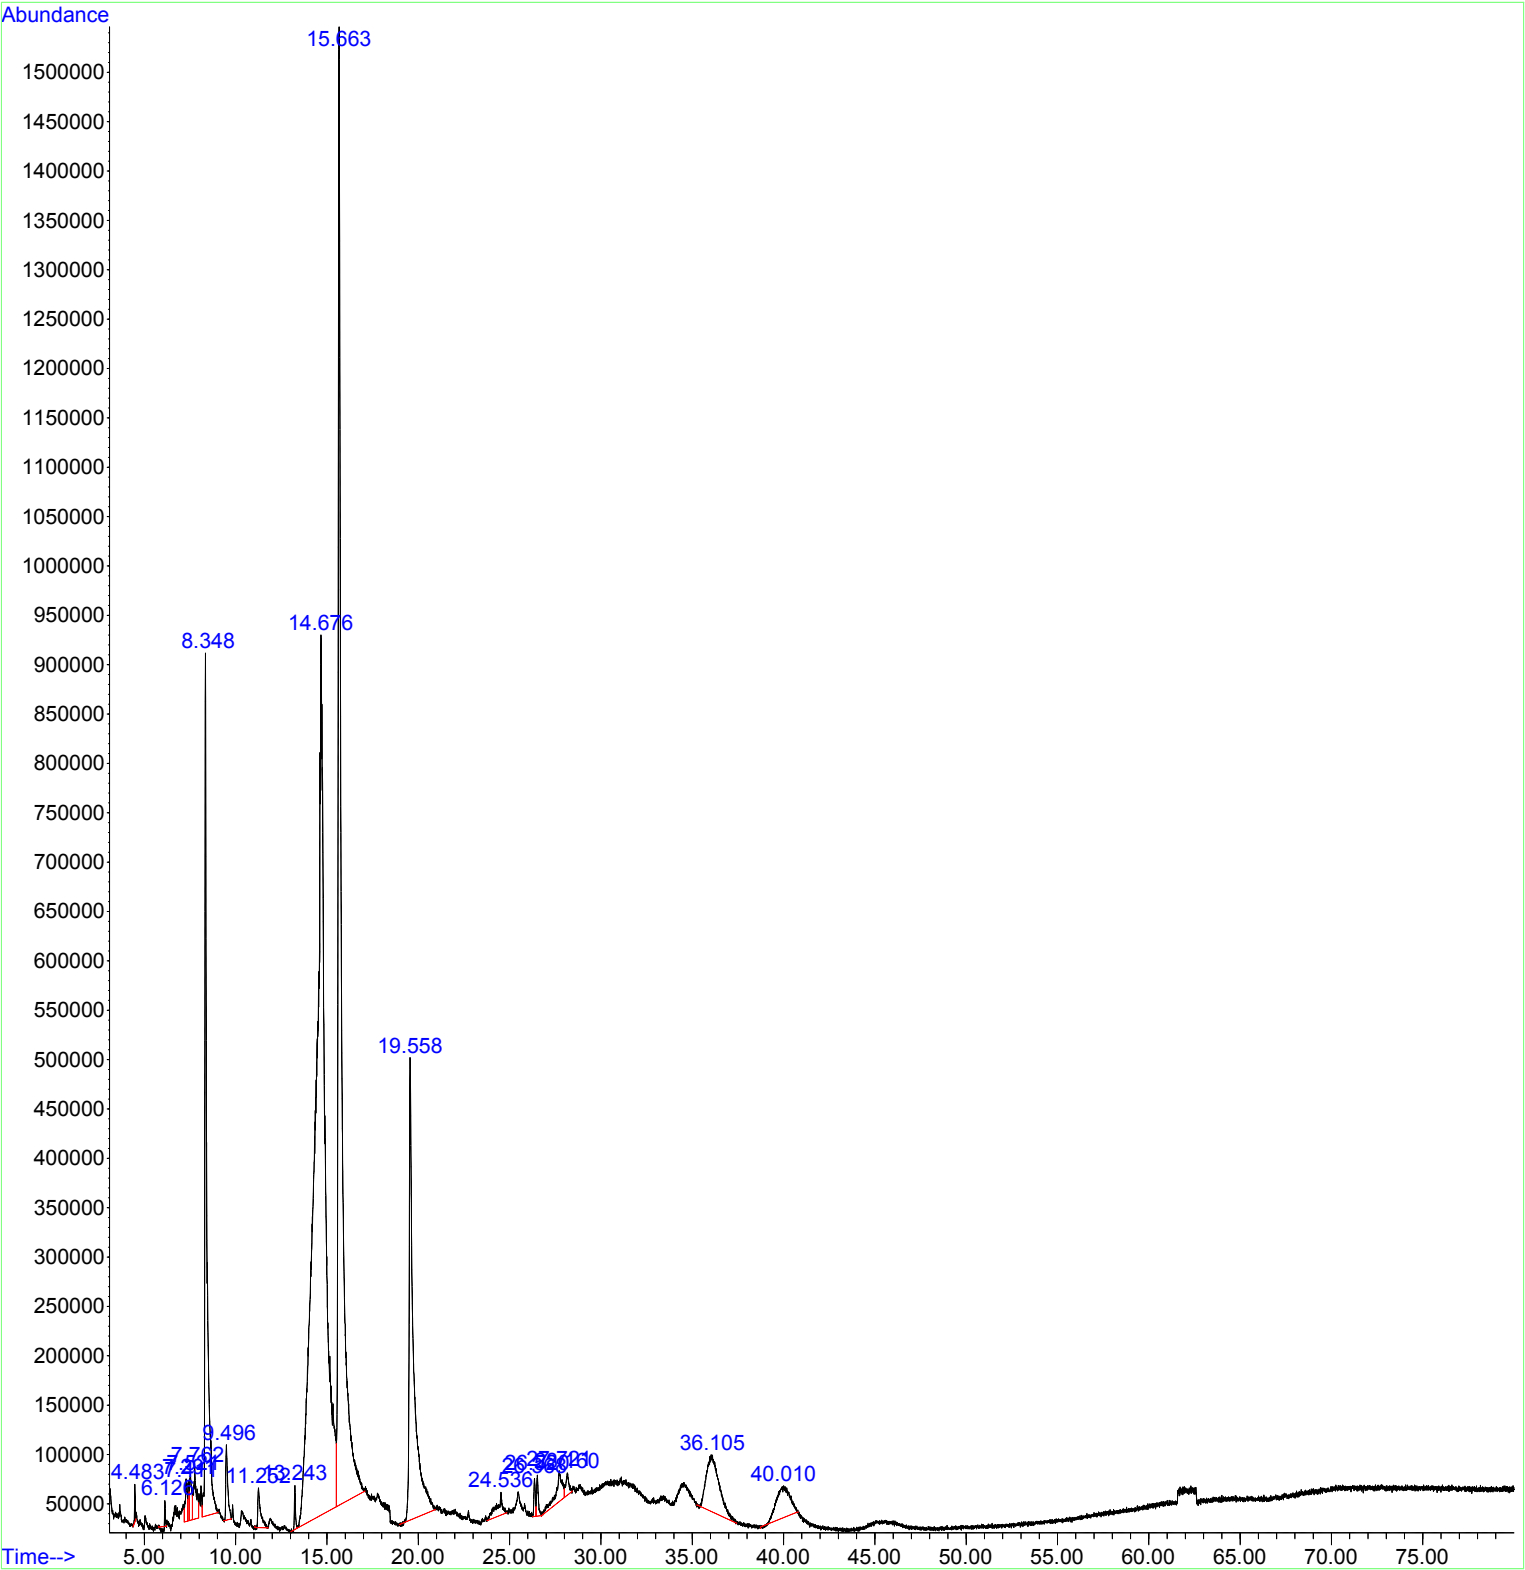

Acq On : 8 Mar 2019 5:17  
Operator :  
Sample : Apiary D 24 :  
Misc : 25  
ALS Vial Sample Multiplier: 1

Integration Parameters: autoint1.e  
Integrator: ChemStation

| peak<br># | R.T.<br>min | first<br>scan | max<br>scan | last<br>scan | PK<br>TY | peak<br>height | corr.<br>area | corr.<br>% max. | % of<br>total |
|-----------|-------------|---------------|-------------|--------------|----------|----------------|---------------|-----------------|---------------|
| ---       | ----        | -----         | -----       | -----        | ---      | -----          | -----         | -----           | -----         |
| 1         | 4.483       | 211           | 244         | 284          | BB       | 80280          | 3124320       | 0.89%           | 0.388%        |
| 2         | 6.125       | 487           | 531         | 547          | BV 2     | 46776          | 1215882       | 0.35%           | 0.151%        |
| 3         | 7.294       | 590           | 735         | 749          | BV 7     | 18341          | 2016659       | 0.57%           | 0.250%        |
| 4         | 8.355       | 905           | 921         | 1092         | VB 2     | 1575705        | 117090096     | 33.26%          | 14.538%       |
| 5         | 9.497       | 1093          | 1120        | 1170         | BV 2     | 122531         | 8971594       | 2.55%           | 1.114%        |
| 6         | 9.836       | 1170          | 1180        | 1206         | VB 3     | 50177          | 1982532       | 0.56%           | 0.246%        |
| 7         | 10.336      | 1236          | 1267        | 1306         | BB 7     | 23105          | 2059984       | 0.59%           | 0.256%        |
| 8         | 11.253      | 1395          | 1427        | 1521         | BB 2     | 102865         | 11026605      | 3.13%           | 1.369%        |
| 9         | 13.245      | 1752          | 1775        | 1790         | BV 2     | 55714          | 2210248       | 0.63%           | 0.274%        |
| 10        | 13.393      | 1790          | 1801        | 1832         | VV 2     | 48131          | 3104879       | 0.88%           | 0.386%        |
| 11        | 14.883      | 1832          | 2062        | 2175         | VV 4     | 724582         | 352010016     | 100.00%         | 43.706%       |
| 12        | 15.677      | 2175          | 2200        | 2442         | VV 2     | 1214979        | 168010477     | 47.73%          | 20.860%       |
| 13        | 19.567      | 2804          | 2880        | 3102         | BB 3     | 666932         | 104753656     | 29.76%          | 13.006%       |
| 14        | 24.534      | 3544          | 3748        | 3797         | BB 3     | 26420          | 6119923       | 1.74%           | 0.760%        |
| 15        | 26.371      | 4038          | 4069        | 4082         | BV 7     | 44587          | 2171171       | 0.62%           | 0.270%        |
| 16        | 26.521      | 4082          | 4095        | 4124         | VB 6     | 47223          | 2947313       | 0.84%           | 0.366%        |
| 17        | 27.729      | 4132          | 4307        | 4350         | BB 6     | 21555          | 1642050       | 0.47%           | 0.204%        |
| 18        | 28.174      | 4351          | 4384        | 4420         | BV 6     | 41018          | 3463652       | 0.98%           | 0.430%        |
| 19        | 28.494      | 4420          | 4440        | 4459         | VV 6     | 17693          | 1246795       | 0.35%           | 0.155%        |
| 20        | 40.132      | 6287          | 6474        | 6571         | BB 8     | 22490          | 10238166      | 2.91%           | 1.271%        |

Sum of corrected areas: 805406018



File  
Operator :  
Acquired : 8 Mar 2019 5:17 using AcqMethod FOMETHOD.M  
Instrument : 5975 MSD  
Sample Name: Apiary D 24  
Misc Info :  
Vial Number: 25

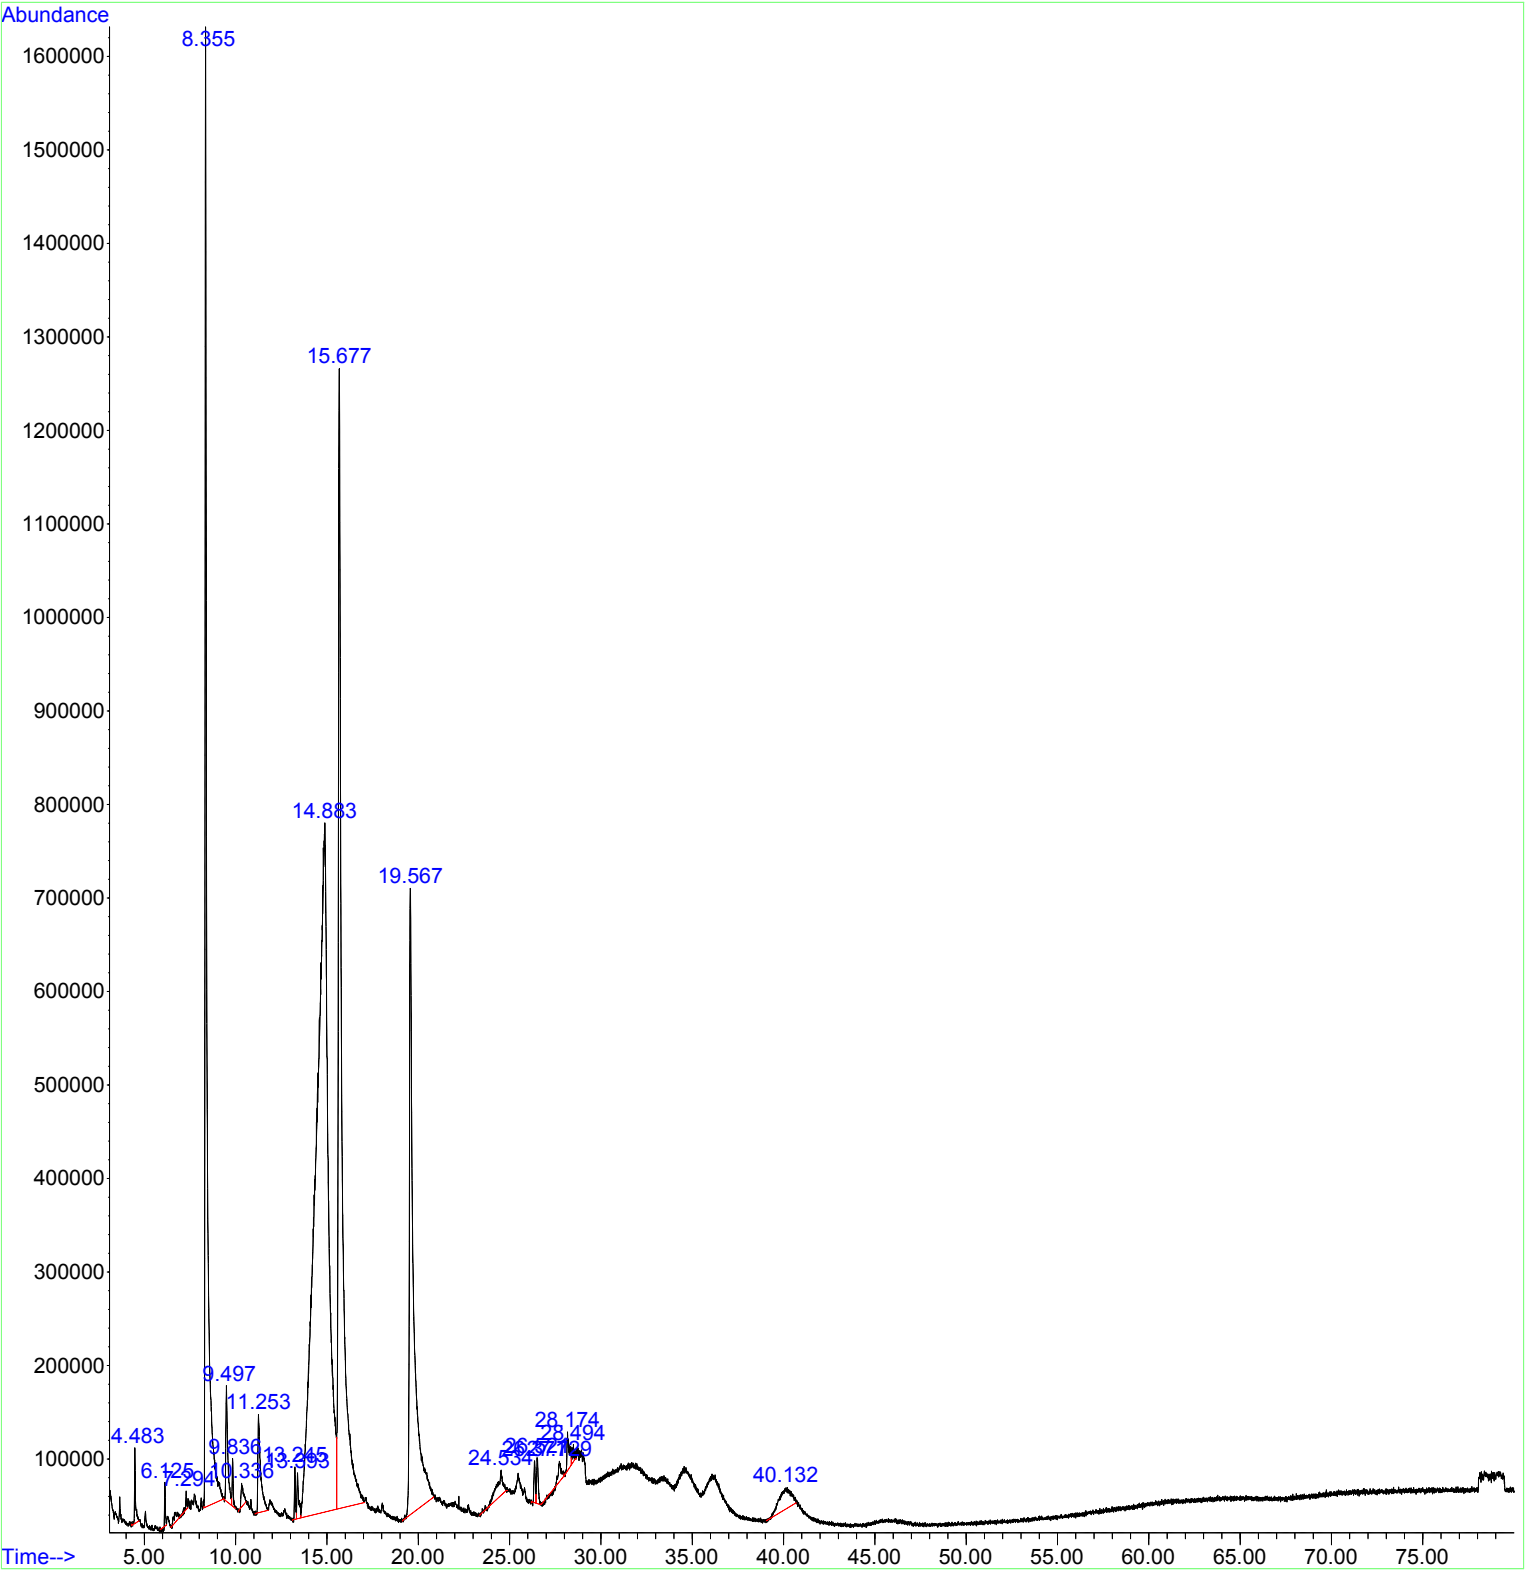

File  
Operator :  
Acquired : 7 Mar 2019 14:23 using AcqMethod FOMETHOD.M  
Instrument : 5975 MSD  
Sample Name: Apiary C 1  
Misc Info :  
Vial Number: 15

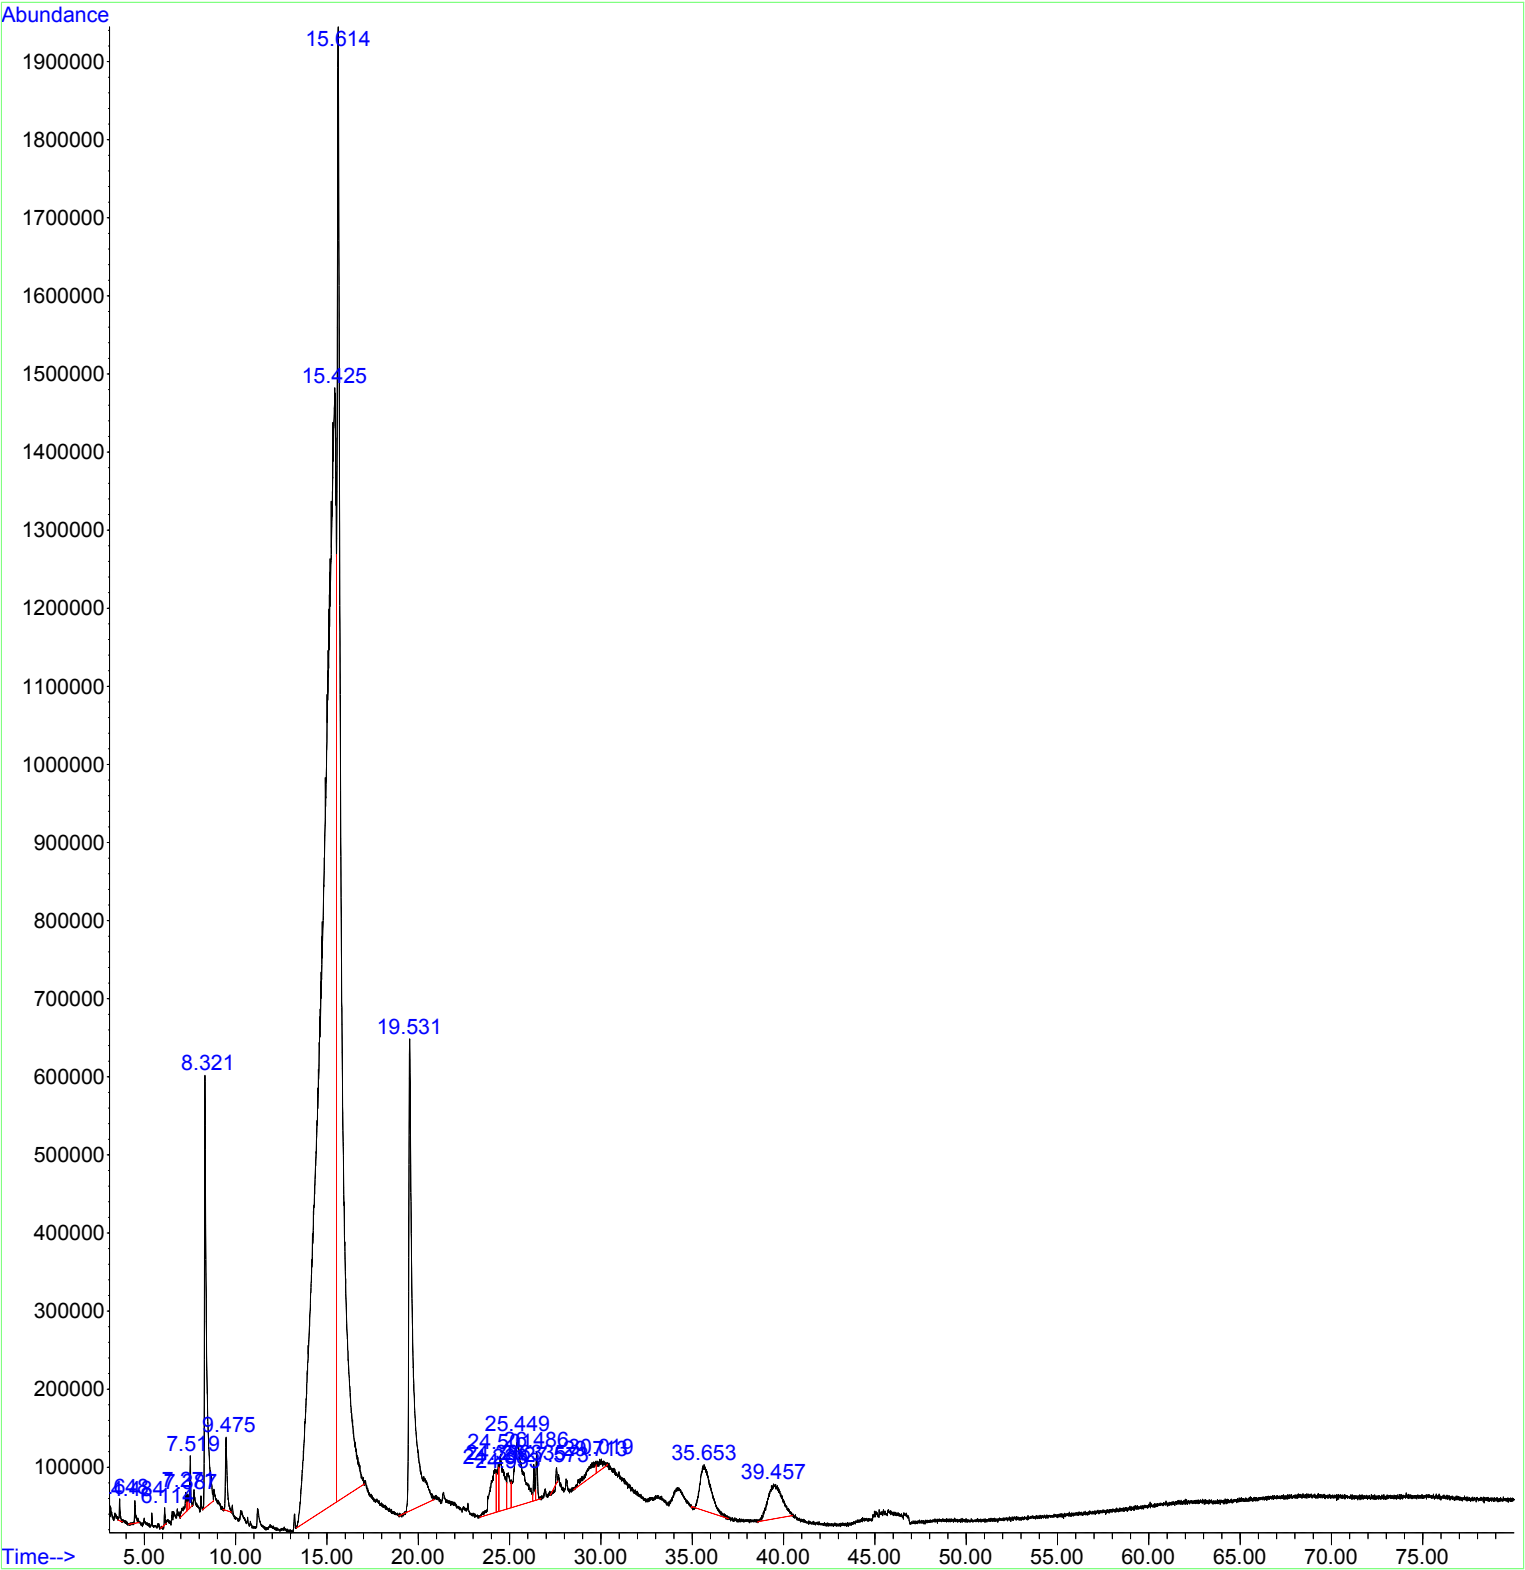

Acq On : 7 Mar 2019 14:23  
Operator :  
Sample : Apiary C 1  
Misc :  
ALS Vial : 15 Sample Multiplier: 1

Integration Parameters: autoint1.e  
Integrator: ChemStation

| peak<br># | R.T.<br>min | first<br>scan | max<br>scan | last<br>scan | PK<br>TY | peak<br>height | corr.<br>area | corr.<br>% max. | % of<br>total |
|-----------|-------------|---------------|-------------|--------------|----------|----------------|---------------|-----------------|---------------|
| ---       | ----        | -----         | -----       | -----        | ---      | -----          | -----         | -----           | -----         |
| 1         | 3.648       | 83            | 98          | 122          | PV 2     | 27559          | 902642        | 0.12%           | 0.066%        |
| 2         | 4.484       | 186           | 244         | 283          | BB       | 28154          | 1396042       | 0.19%           | 0.103%        |
| 3         | 6.114       | 491           | 529         | 544          | BV 2     | 21425          | 540876        | 0.07%           | 0.040%        |
| 4         | 7.271       | 676           | 731         | 743          | BV 7     | 24888          | 2173819       | 0.29%           | 0.160%        |
| 5         | 7.387       | 743           | 752         | 764          | VV 3     | 20020          | 1053796       | 0.14%           | 0.078%        |
| 6         | 7.519       | 764           | 775         | 798          | VV 3     | 64700          | 2118282       | 0.28%           | 0.156%        |
| 7         | 8.321       | 893           | 915         | 996          | PV 3     | 553496         | 42969704      | 5.70%           | 3.164%        |
| 8         | 9.475       | 1086          | 1116        | 1166         | BV 2     | 91822          | 6133895       | 0.81%           | 0.452%        |
| 9         | 15.425      | 1789          | 2156        | 2173         | PV 2     | 1417245        | 753701166     | 100.00%         | 55.491%       |
| 10        | 15.614      | 2173          | 2189        | 2439         | VV 4     | 1882196        | 327094424     | 43.40%          | 24.082%       |
| 11        | 19.531      | 2770          | 2874        | 3107         | BV 2     | 603375         | 93341786      | 12.38%          | 6.872%        |
| 12        | 24.238      | 3545          | 3697        | 3702         | BV 2     | 54287          | 12318513      | 1.63%           | 0.907%        |
| 13        | 24.386      | 3702          | 3722        | 3727         | VV 2     | 60232          | 4493584       | 0.60%           | 0.331%        |
| 14        | 24.501      | 3727          | 3742        | 3801         | VV 2     | 70734          | 13024712      | 1.73%           | 0.959%        |
| 15        | 24.933      | 3801          | 3818        | 3845         | VV 2     | 45559          | 5890723       | 0.78%           | 0.434%        |
| 16        | 25.449      | 3845          | 3908        | 4050         | VV 2     | 84722          | 28728971      | 3.81%           | 2.115%        |
| 17        | 26.335      | 4050          | 4063        | 4078         | VV 4     | 44574          | 2227265       | 0.30%           | 0.164%        |
| 18        | 26.486      | 4078          | 4089        | 4128         | VB 7     | 60125          | 3489066       | 0.46%           | 0.257%        |
| 19        | 27.573      | 4220          | 4279        | 4289         | PV 7     | 20107          | 332440        | 0.04%           | 0.024%        |
| 20        | 29.713      | 4445          | 4653        | 4660         | PV 7     | 14500          | 6271788       | 0.83%           | 0.462%        |
| 21        | 30.019      | 4660          | 4707        | 4763         | VB 7     | 11866          | 2588137       | 0.34%           | 0.191%        |
| 22        | 35.653      | 5571          | 5691        | 5923         | BV 7     | 58026          | 23784269      | 3.16%           | 1.751%        |
| 23        | 39.457      | 6206          | 6356        | 6537         | BB 5     | 43469          | 23676446      | 3.14%           | 1.743%        |

Sum of corrected areas: 1358252344

Acq On : 7 Mar 2019 15:52  
Operator :  
Sample : Apiary C 2  
Misc :  
ALS Vial : 16 Sample Multiplier: 1

Integration Parameters: autoint1.e  
Integrator: ChemStation

| peak<br># | R.T.<br>min | first<br>scan | max<br>scan | last<br>scan | PK<br>TY | peak<br>height | corr.<br>area | corr.<br>% max. | % of<br>total |
|-----------|-------------|---------------|-------------|--------------|----------|----------------|---------------|-----------------|---------------|
| ---       | ----        | -----         | -----       | -----        | ---      | -----          | -----         | -----           | -----         |
| 1         | 3.645       | 80            | 98          | 117          | BV 2     | 44996          | 1180291       | 0.11%           | 0.064%        |
| 2         | 8.323       | 888           | 915         | 1091         | VB       | 799207         | 67551550      | 6.24%           | 3.670%        |
| 3         | 9.475       | 1094          | 1116        | 1196         | BB 2     | 110712         | 8153984       | 0.75%           | 0.443%        |
| 4         | 11.218      | 1396          | 1421        | 1498         | BB 2     | 44208          | 4171406       | 0.39%           | 0.227%        |
| 5         | 13.222      | 1732          | 1771        | 1790         | BV 3     | 56663          | 2245204       | 0.21%           | 0.122%        |
| 6         | 15.396      | 1790          | 2151        | 2173         | VV 3     | 2031808        | 1082215712    | 100.00%         | 58.790%       |
| 7         | 15.624      | 2173          | 2191        | 2436         | VV 2     | 3036232        | 461174464     | 42.61%          | 25.053%       |
| 8         | 19.532      | 2814          | 2874        | 2997         | BV 3     | 766432         | 102798811     | 9.50%           | 5.584%        |
| 9         | 20.324      | 2997          | 3012        | 3097         | VB 6     | 42815          | 8049835       | 0.74%           | 0.437%        |
| 10        | 24.309      | 3549          | 3709        | 3722         | BV 5     | 31597          | 7988074       | 0.74%           | 0.434%        |
| 11        | 24.504      | 3722          | 3743        | 3780         | VB 5     | 31605          | 3517605       | 0.33%           | 0.191%        |
| 12        | 25.430      | 3830          | 3905        | 3965         | BV 5     | 50475          | 7752139       | 0.72%           | 0.421%        |
| 13        | 26.485      | 4075          | 4089        | 4125         | VB 10    | 44700          | 2288667       | 0.21%           | 0.124%        |
| 14        | 27.566      | 4127          | 4278        | 4289         | BV 10    | 42065          | 8335395       | 0.77%           | 0.453%        |
| 15        | 29.310      | 4412          | 4583        | 4760         | VB 10    | 27108          | 16030898      | 1.48%           | 0.871%        |
| 16        | 35.628      | 5597          | 5687        | 5930         | BB 10    | 70357          | 29735272      | 2.75%           | 1.615%        |
| 17        | 39.370      | 6210          | 6341        | 6613         | BB 6     | 47368          | 27616604      | 2.55%           | 1.500%        |

Sum of corrected areas: 1840805914

File  
Operator :  
Acquired : 7 Mar 2019 15:52 using AcqMethod FOMETHOD.M  
Instrument : 5975 MSD  
Sample Name: Apiary C 2  
Misc Info :  
Vial Number: 16

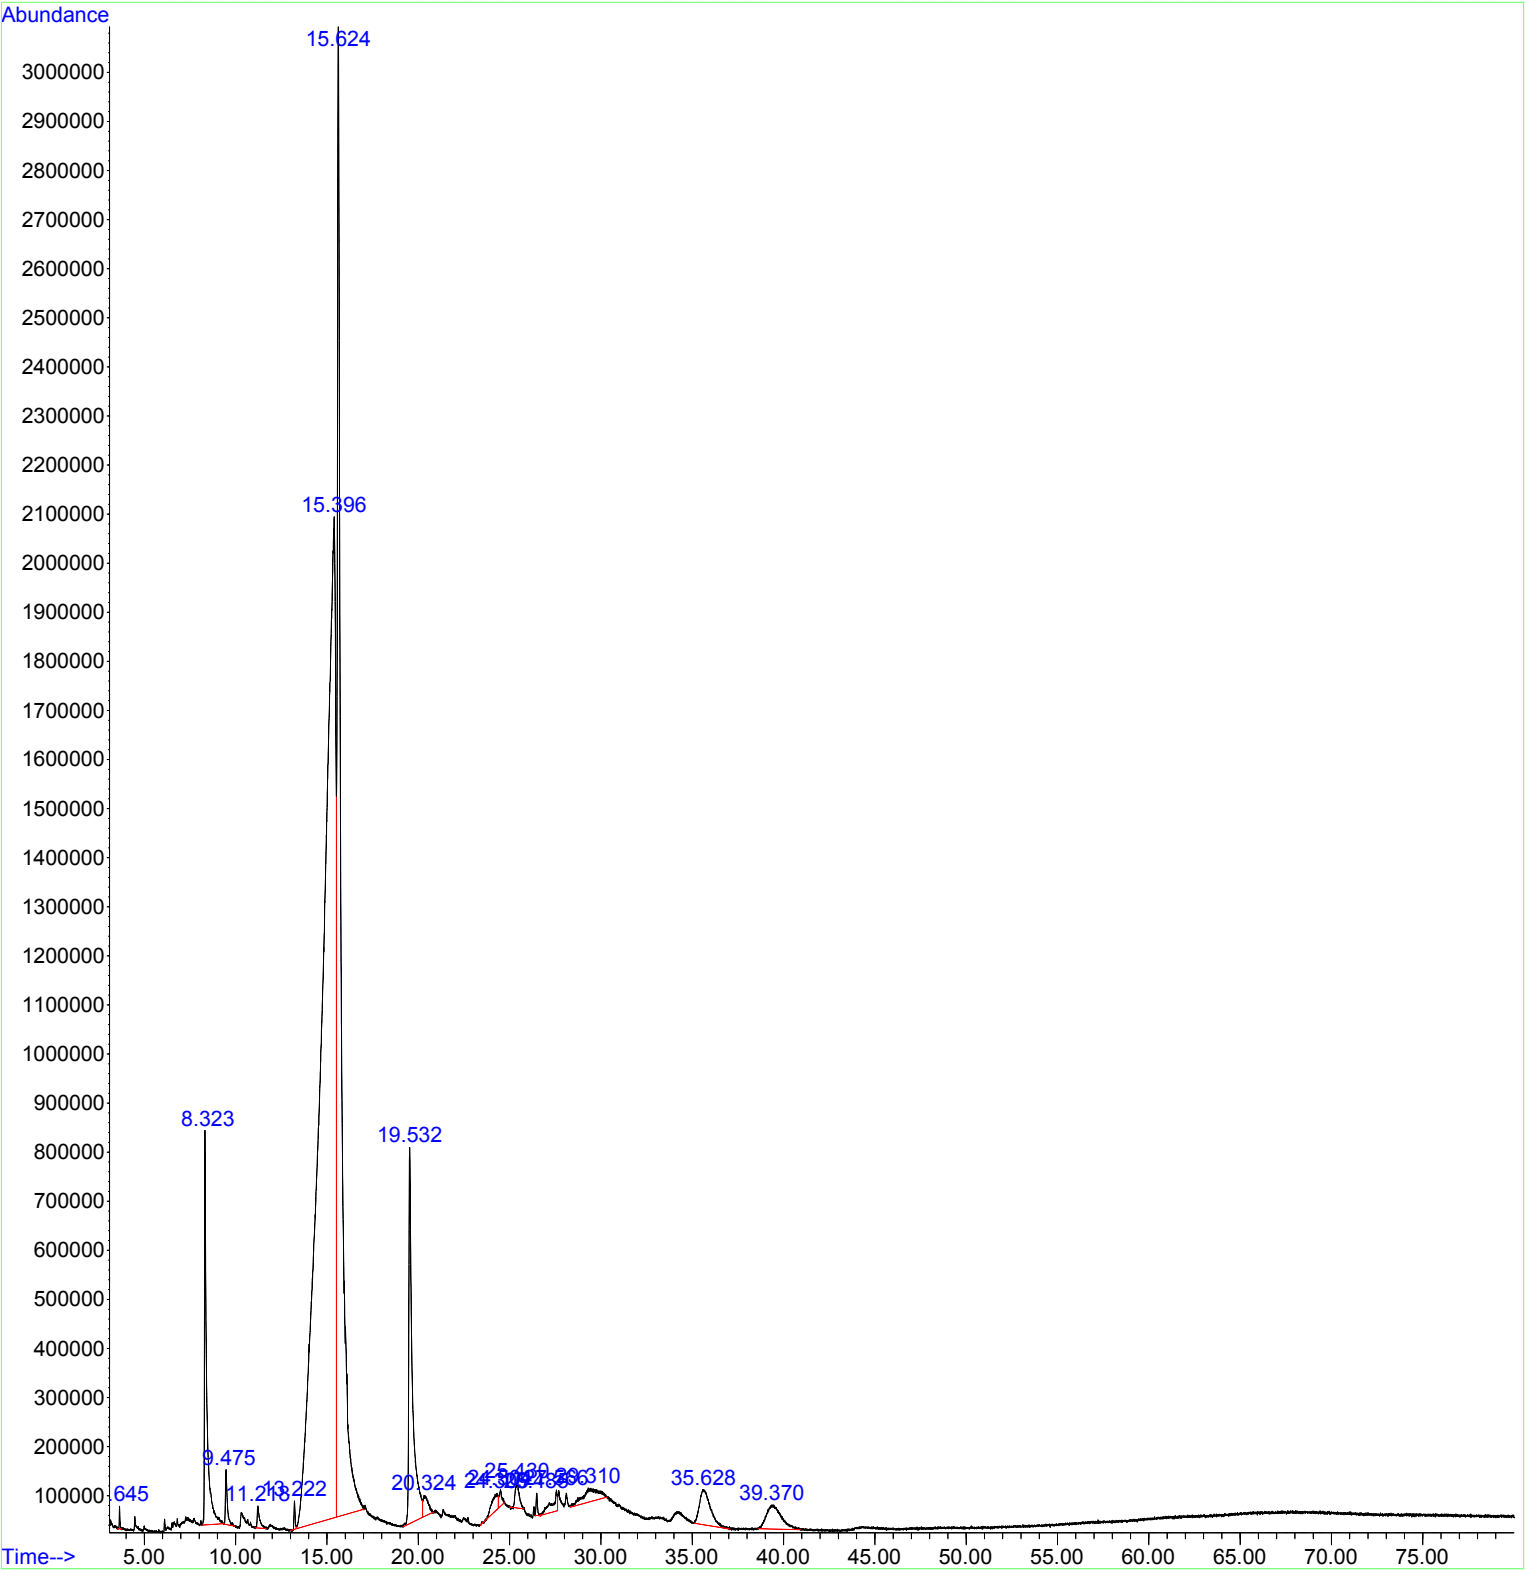

Acq On : 7 Mar 2019 17:22  
Operator :  
Sample : Apiary C 19  
Misc :  
ALS Vial : 17 Sample Multiplier: 1

Integration Parameters: autoint1.e  
Integrator: ChemStation

| peak<br># | R.T.<br>min | first<br>scan | max<br>scan | last<br>scan | PK<br>TY | peak<br>height | corr.<br>area | corr.<br>% max. | % of<br>total |
|-----------|-------------|---------------|-------------|--------------|----------|----------------|---------------|-----------------|---------------|
| ---       | ----        | -----         | -----       | -----        | ---      | -----          | -----         | -----           | -----         |
| 1         | 4.481       | 228           | 244         | 305          | PB 3     | 26007          | 1562722       | 0.44%           | 0.182%        |
| 2         | 7.268       | 717           | 731         | 779          | VB 6     | 28466          | 3185993       | 0.91%           | 0.371%        |
| 3         | 8.323       | 888           | 915         | 1034         | PV       | 349396         | 27750596      | 7.89%           | 3.233%        |
| 4         | 9.476       | 1083          | 1117        | 1166         | BV 2     | 66269          | 4759807       | 1.35%           | 0.555%        |
| 5         | 11.221      | 1388          | 1421        | 1499         | BB       | 46681          | 4506250       | 1.28%           | 0.525%        |
| 6         | 14.348      | 1789          | 1968        | 1972         | VV 4     | 589402         | 142894920     | 40.64%          | 16.650%       |
| 7         | 14.757      | 1972          | 2040        | 2164         | VV 3     | 996688         | 351638203     | 100.00%         | 40.972%       |
| 8         | 15.611      | 2164          | 2189        | 2439         | VV 2     | 1215750        | 170619398     | 48.52%          | 19.880%       |
| 9         | 19.528      | 2835          | 2873        | 3000         | BV 2     | 393907         | 57464025      | 16.34%          | 6.696%        |
| 10        | 20.334      | 3000          | 3014        | 3055         | VB 9     | 15503          | 1978689       | 0.56%           | 0.231%        |
| 11        | 24.510      | 3606          | 3744        | 3815         | PB 9     | 29883          | 7961246       | 2.26%           | 0.928%        |
| 12        | 25.436      | 3832          | 3906        | 3958         | BV 9     | 26333          | 4112033       | 1.17%           | 0.479%        |
| 13        | 26.341      | 4048          | 4064        | 4078         | PV 6     | 42226          | 1997243       | 0.57%           | 0.233%        |
| 14        | 26.492      | 4078          | 4090        | 4122         | VB 4     | 40082          | 2217135       | 0.63%           | 0.258%        |
| 15        | 27.573      | 4228          | 4279        | 4287         | VV 4     | 23465          | 2539686       | 0.72%           | 0.296%        |
| 16        | 27.700      | 4287          | 4302        | 4357         | VV 4     | 40656          | 4681992       | 1.33%           | 0.546%        |
| 17        | 28.116      | 4357          | 4374        | 4420         | VV 4     | 30398          | 2412473       | 0.69%           | 0.281%        |
| 18        | 34.392      | 5338          | 5471        | 5594         | BB 4     | 27867          | 11520686      | 3.28%           | 1.342%        |
| 19        | 35.767      | 5598          | 5711        | 5961         | BB 4     | 89031          | 40607631      | 11.55%          | 4.732%        |
| 20        | 39.545      | 6226          | 6372        | 6542         | BB 8     | 25869          | 13827127      | 3.93%           | 1.611%        |

Sum of corrected areas: 858237856

File  
Operator :  
Acquired : 7 Mar 2019 17:22 using AcqMethod FOMETHOD.M  
Instrument : 5975 MSD  
Sample Name: Apiary C 19  
Misc Info :  
Vial Number: 17

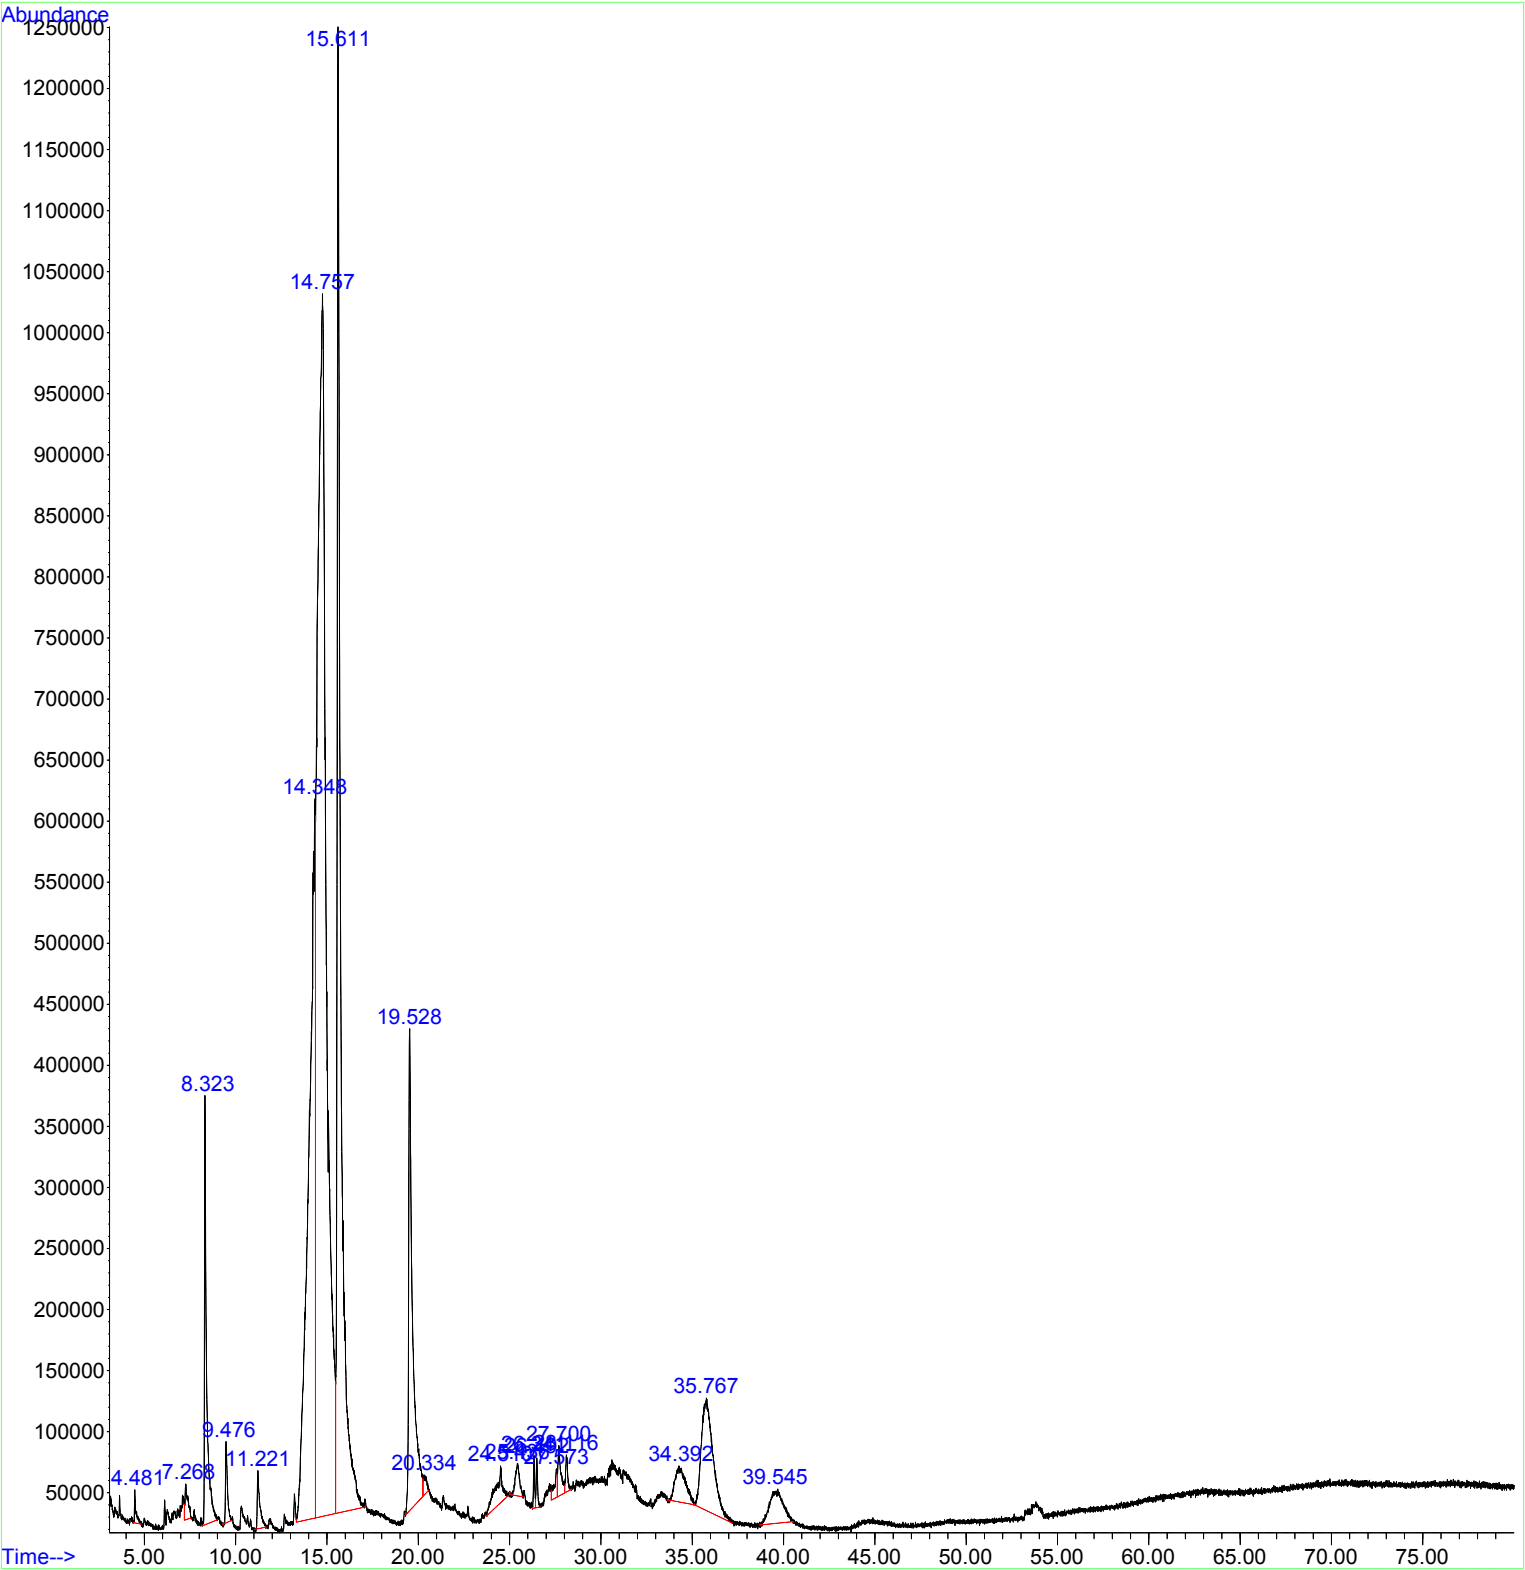

Acq On : 7 Mar 2019 18:51  
Operator :  
Sample : Apiary C 21  
Misc :  
ALS Vial : 18 Sample Multiplier: 1

Integration Parameters: autoint1.e  
Integrator: ChemStation

Method  
Title

| peak<br># | R.T.<br>min | first<br>scan | max<br>scan | last<br>scan | PK<br>TY | peak<br>height | corr.<br>area | corr.<br>% max. | % of<br>total |
|-----------|-------------|---------------|-------------|--------------|----------|----------------|---------------|-----------------|---------------|
| ---       | ----        | -----         | -----       | -----        | ---      | -----          | -----         | -----           | -----         |
| 1         | 4.488       | 206           | 245         | 316          | BB 2     | 30245          | 1951219       | 0.69%           | 0.301%        |
| 2         | 6.119       | 496           | 530         | 545          | BV 2     | 17759          | 389037        | 0.14%           | 0.060%        |
| 3         | 6.811       | 627           | 651         | 673          | VV 2     | 11409          | 896470        | 0.32%           | 0.138%        |
| 4         | 7.280       | 673           | 733         | 746          | VV 6     | 23228          | 2313419       | 0.82%           | 0.357%        |
| 5         | 7.400       | 746           | 754         | 765          | VV 5     | 16291          | 803101        | 0.29%           | 0.124%        |
| 6         | 7.519       | 765           | 775         | 798          | VV 3     | 28304          | 1036332       | 0.37%           | 0.160%        |
| 7         | 8.331       | 890           | 917         | 1093         | PB 2     | 401607         | 31133832      | 11.09%          | 4.803%        |
| 8         | 9.482       | 1098          | 1118        | 1165         | BV 3     | 61107          | 4430561       | 1.58%           | 0.684%        |
| 9         | 11.226      | 1384          | 1423        | 1498         | BB 4     | 36807          | 3077455       | 1.10%           | 0.475%        |
| 10        | 13.230      | 1734          | 1773        | 1792         | BV 4     | 47354          | 2192348       | 0.78%           | 0.338%        |
| 11        | 14.118      | 1792          | 1928        | 1936         | VV 2     | 336759         | 62051536      | 22.10%          | 9.573%        |
| 12        | 14.734      | 1936          | 2036        | 2165         | VV 3     | 684187         | 280792501     | 100.00%         | 43.318%       |
| 13        | 15.620      | 2165          | 2190        | 2434         | VV 3     | 844767         | 121228357     | 43.17%          | 18.702%       |
| 14        | 19.535      | 2830          | 2874        | 3144         | PV 3     | 487627         | 85930818      | 30.60%          | 13.257%       |
| 15        | 24.519      | 3619          | 3746        | 3808         | BV 8     | 33420          | 5187244       | 1.85%           | 0.800%        |
| 16        | 25.449      | 3808          | 3908        | 3955         | VV 8     | 27702          | 4803472       | 1.71%           | 0.741%        |
| 17        | 26.346      | 4052          | 4065        | 4078         | PV 7     | 47071          | 2186988       | 0.78%           | 0.337%        |
| 18        | 26.494      | 4078          | 4091        | 4131         | VV 5     | 65987          | 3543465       | 1.26%           | 0.547%        |
| 19        | 27.713      | 4255          | 4304        | 4357         | VV 5     | 45628          | 6908504       | 2.46%           | 1.066%        |
| 20        | 28.131      | 4357          | 4377        | 4423         | VV 5     | 36078          | 2950830       | 1.05%           | 0.455%        |
| 21        | 34.428      | 5370          | 5477        | 5569         | BB 5     | 18187          | 6089138       | 2.17%           | 0.939%        |
| 22        | 35.850      | 5591          | 5726        | 5933         | BB 5     | 40777          | 18311139      | 6.52%           | 2.825%        |

Sum of corrected areas: 648207764



File  
Operator :  
Acquired : 7 Mar 2019 18:51 using AcqMethod FOMETHOD.M  
Instrument : 5975 MSD  
Sample Name: Apiary C 21  
Misc Info :  
Vial Number: 18

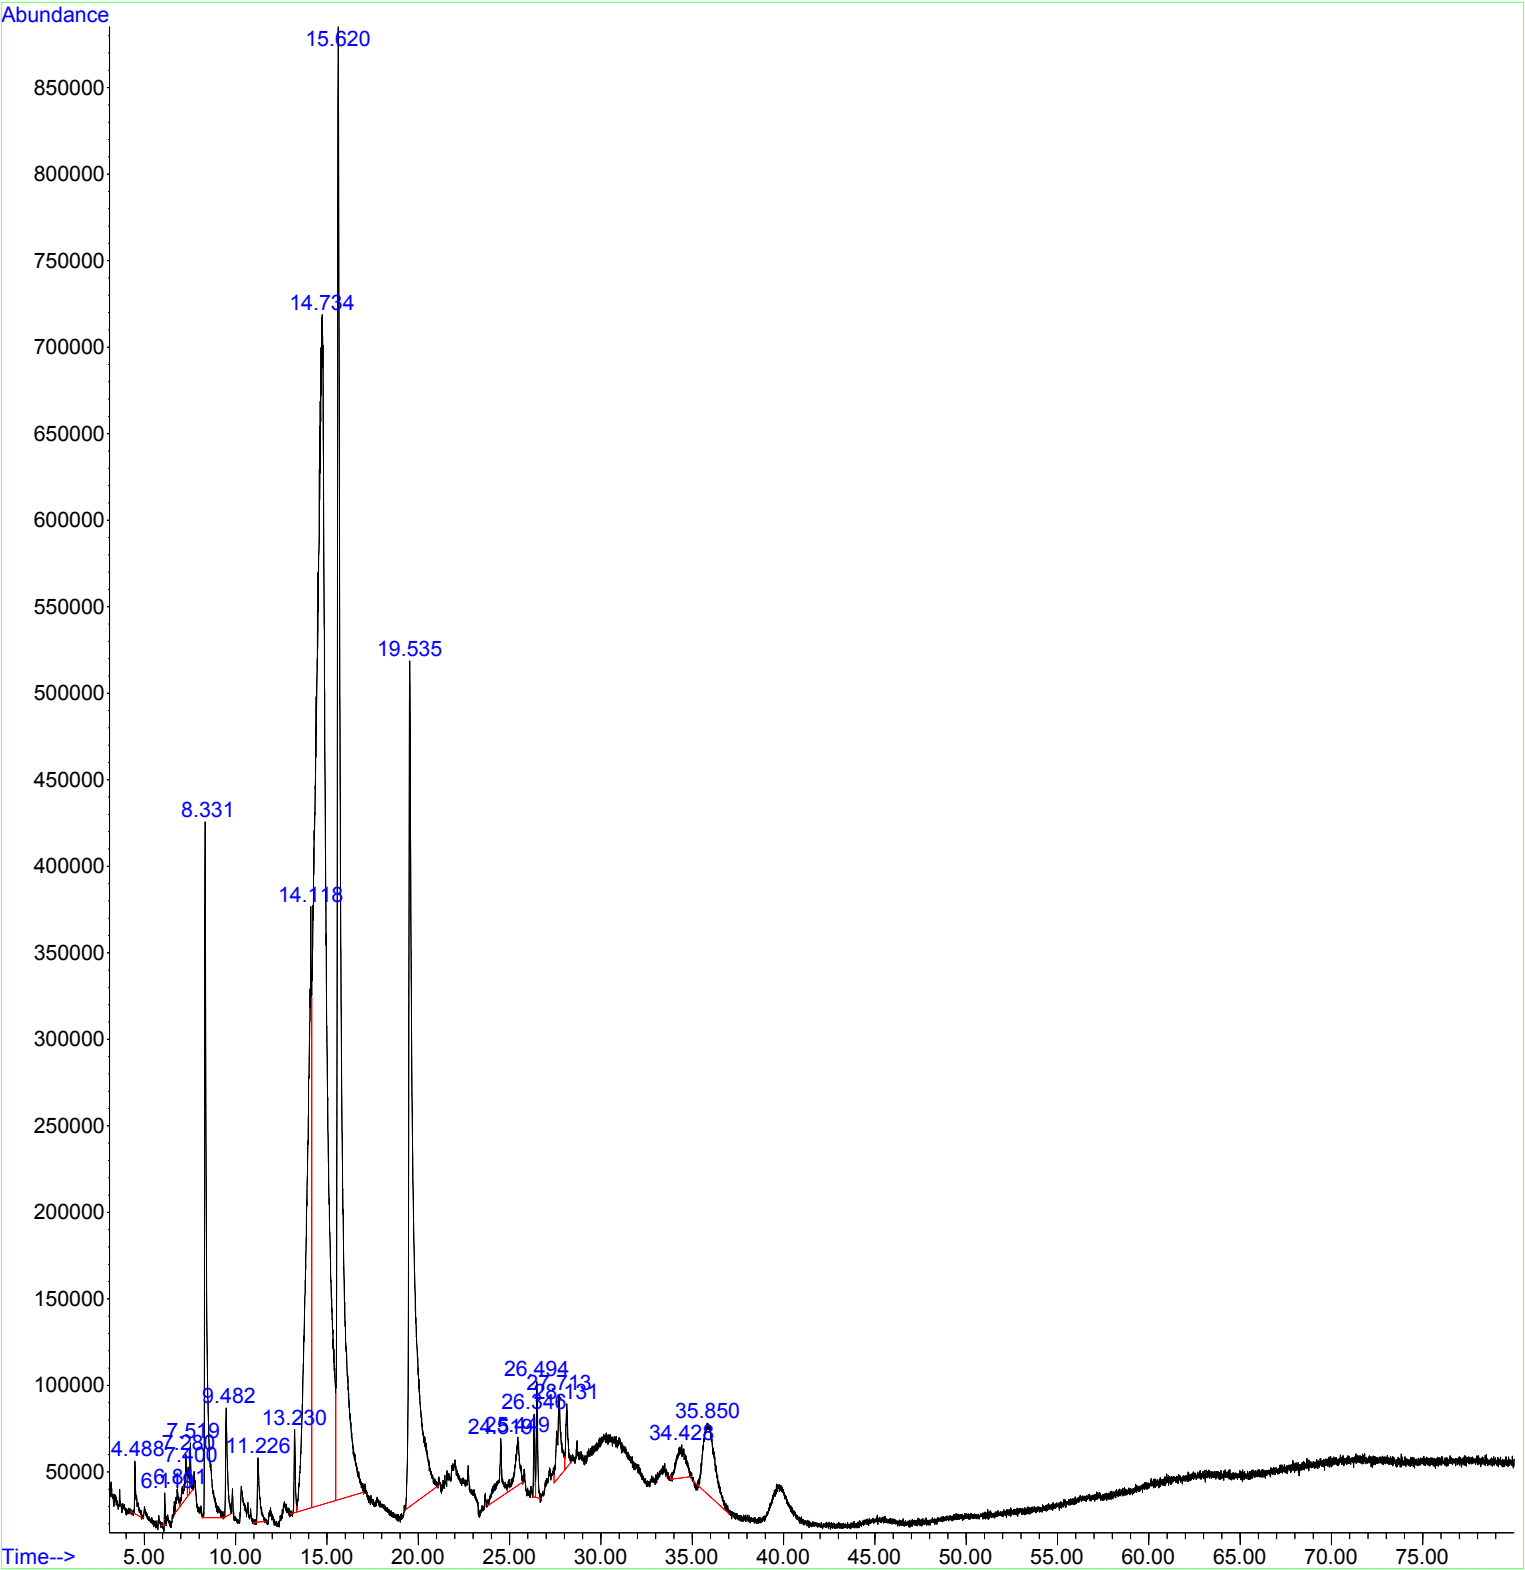

File  
Operator :  
Acquired : 7 Mar 2019 20:21 using AcqMethod FOMETHOD.M  
Instrument : 5975 MSD  
Sample Name: Apiary C 22  
Misc Info :  
Vial Number: 19

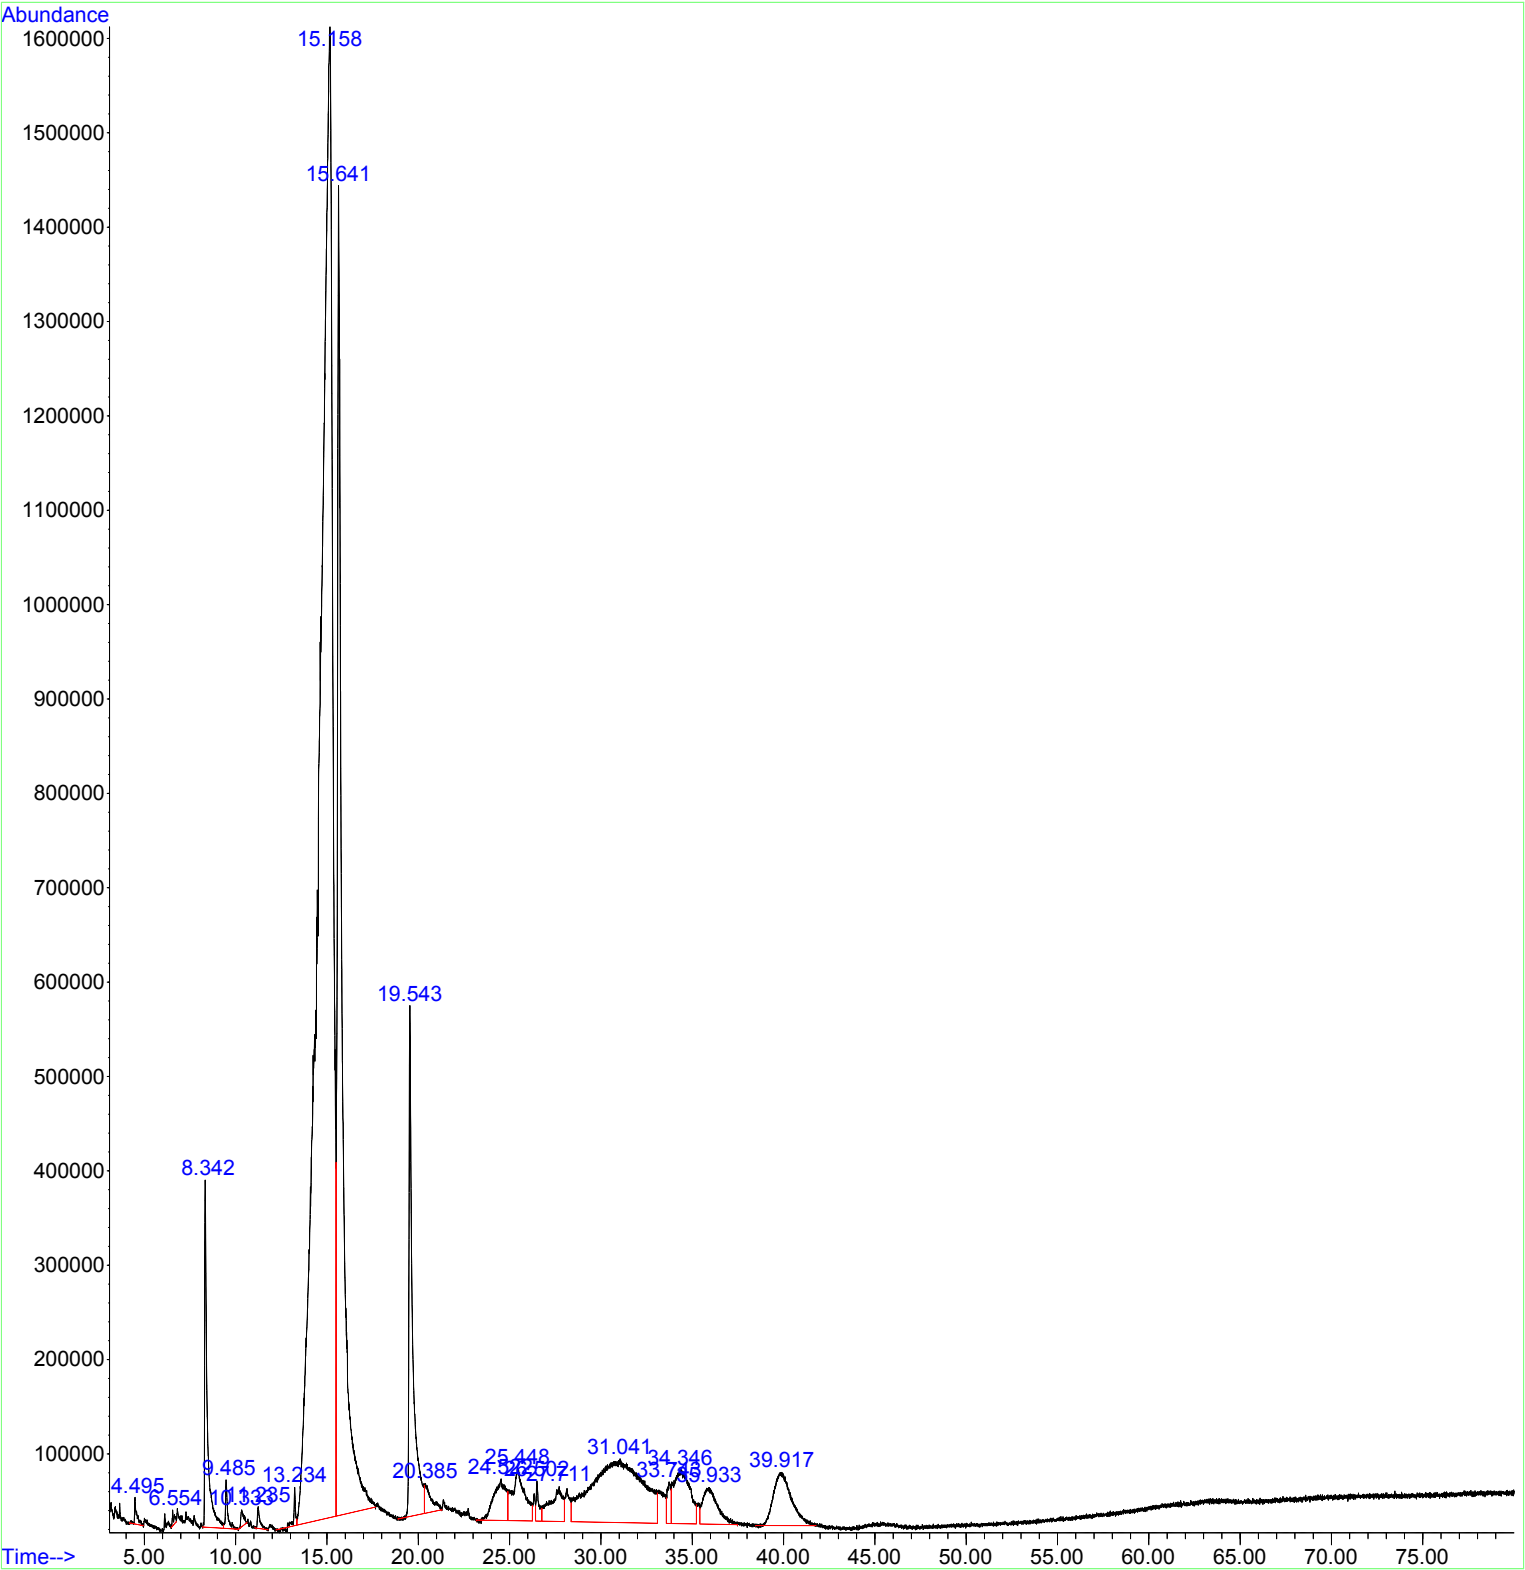

Acq On : 7 Mar 2019 20:21  
Operator :  
Sample : Apiary C 22  
Misc :  
ALS Vial : 19 Sample Multiplier: 1

Integration Parameters: autoint1.e  
Integrator: ChemStation

| peak<br># | R.T.<br>min | first<br>scan | max<br>scan | last<br>scan | PK<br>TY | peak<br>height | corr.<br>area | corr.<br>% max. | % of<br>total |
|-----------|-------------|---------------|-------------|--------------|----------|----------------|---------------|-----------------|---------------|
| ---       | ----        | -----         | -----       | -----        | ---      | -----          | -----         | -----           | -----         |
| 1         | 4.495       | 192           | 246         | 323          | BV 5     | 26632          | 2309006       | 0.28%           | 0.153%        |
| 2         | 6.554       | 591           | 606         | 641          | PV 4     | 15680          | 1027132       | 0.13%           | 0.068%        |
| 3         | 8.342       | 890           | 918         | 1092         | PV 3     | 355953         | 35130724      | 4.29%           | 2.326%        |
| 4         | 9.485       | 1092          | 1118        | 1235         | VB 2     | 48287          | 4363029       | 0.53%           | 0.289%        |
| 5         | 10.333      | 1235          | 1266        | 1315         | BV 7     | 16444          | 1858179       | 0.23%           | 0.123%        |
| 6         | 11.235      | 1392          | 1424        | 1518         | BV 2     | 21966          | 2180882       | 0.27%           | 0.144%        |
| 7         | 13.234      | 1595          | 1773        | 1794         | BV 3     | 36675          | 2111031       | 0.26%           | 0.140%        |
| 8         | 15.158      | 1794          | 2110        | 2169         | VV 3     | 1574374        | 819769776     | 100.00%         | 54.268%       |
| 9         | 15.641      | 2169          | 2194        | 2545         | VV 3     | 1386256        | 264520518     | 32.27%          | 17.511%       |
| 10        | 19.543      | 2761          | 2876        | 3015         | BV 3     | 538269         | 73996702      | 9.03%           | 4.899%        |
| 11        | 20.385      | 3015          | 3023        | 3181         | VV 3     | 30853          | 7563136       | 0.92%           | 0.501%        |
| 12        | 24.522      | 3511          | 3746        | 3813         | BV 3     | 41989          | 19533312      | 2.38%           | 1.293%        |
| 13        | 25.448      | 3813          | 3908        | 4048         | VV 3     | 52914          | 25806212      | 3.15%           | 1.708%        |
| 14        | 26.502      | 4078          | 4092        | 4137         | VV 3     | 41128          | 4425684       | 0.54%           | 0.293%        |
| 15        | 27.711      | 4137          | 4303        | 4354         | VV 3     | 35985          | 16787258      | 2.05%           | 1.111%        |
| 16        | 31.041      | 4418          | 4885        | 5244         | VV 9     | 65699          | 128274795     | 15.65%          | 8.492%        |
| 17        | 33.743      | 5329          | 5358        | 5377         | VV 9     | 42857          | 6146355       | 0.75%           | 0.407%        |
| 18        | 34.346      | 5377          | 5463        | 5617         | VV 9     | 55302          | 34703424      | 4.23%           | 2.297%        |
| 19        | 35.933      | 5650          | 5740        | 6010         | VB 9     | 37201          | 21649811      | 2.64%           | 1.433%        |
| 20        | 39.917      | 6183          | 6437        | 6760         | BV 6     | 55643          | 38438005      | 4.69%           | 2.545%        |

Sum of corrected areas: 1510594970
